# Supplementary material for: Blood coagulation parameter abnormalities in hospitalized patients with confirmed COVID-19 in Ethiopia
Source: PubMed Central journal article supplement (PMC8216564; doi:10.1371/journal.pone.0252939), 2021-06-21
Supplement: pone.0252939.s002.pdf [file pone.0252939.s002.pdf]

# PLOS ONE

## Blood coagulation parameter abnormalities in hospitalized patients with confirmed COVID-19 in Ethiopia --Manuscript Draft--

|                               |                                                                                                                                                                                                                                                                                                                                                                                                                                                                                                                                                                                                                                                                                                                                                                                                                                                                                                                                                                                                                                                                                                                                                                                                                                                                                                                                                                                                                                                                                                                                                                                                                                                                                                                              |
|-------------------------------|------------------------------------------------------------------------------------------------------------------------------------------------------------------------------------------------------------------------------------------------------------------------------------------------------------------------------------------------------------------------------------------------------------------------------------------------------------------------------------------------------------------------------------------------------------------------------------------------------------------------------------------------------------------------------------------------------------------------------------------------------------------------------------------------------------------------------------------------------------------------------------------------------------------------------------------------------------------------------------------------------------------------------------------------------------------------------------------------------------------------------------------------------------------------------------------------------------------------------------------------------------------------------------------------------------------------------------------------------------------------------------------------------------------------------------------------------------------------------------------------------------------------------------------------------------------------------------------------------------------------------------------------------------------------------------------------------------------------------|
| <b>Manuscript Number:</b>     | PONE-D-20-35898R1                                                                                                                                                                                                                                                                                                                                                                                                                                                                                                                                                                                                                                                                                                                                                                                                                                                                                                                                                                                                                                                                                                                                                                                                                                                                                                                                                                                                                                                                                                                                                                                                                                                                                                            |
| <b>Article Type:</b>          | Research Article                                                                                                                                                                                                                                                                                                                                                                                                                                                                                                                                                                                                                                                                                                                                                                                                                                                                                                                                                                                                                                                                                                                                                                                                                                                                                                                                                                                                                                                                                                                                                                                                                                                                                                             |
| <b>Full Title:</b>            | Blood coagulation parameter abnormalities in hospitalized patients with confirmed COVID-19 in Ethiopia                                                                                                                                                                                                                                                                                                                                                                                                                                                                                                                                                                                                                                                                                                                                                                                                                                                                                                                                                                                                                                                                                                                                                                                                                                                                                                                                                                                                                                                                                                                                                                                                                       |
| <b>Short Title:</b>           | Coagulation profile of COVID-19 patients                                                                                                                                                                                                                                                                                                                                                                                                                                                                                                                                                                                                                                                                                                                                                                                                                                                                                                                                                                                                                                                                                                                                                                                                                                                                                                                                                                                                                                                                                                                                                                                                                                                                                     |
| <b>Corresponding Author:</b>  | Shambel Araya, MSc<br>Addis Ababa University<br>Addis Ababa, ETHIOPIA                                                                                                                                                                                                                                                                                                                                                                                                                                                                                                                                                                                                                                                                                                                                                                                                                                                                                                                                                                                                                                                                                                                                                                                                                                                                                                                                                                                                                                                                                                                                                                                                                                                        |
| <b>Keywords:</b>              | COVID-19; Prothrombin time; activated partial thromboplastin time; international normalized ratio; platelet; Addis Ababa; Ethiopia                                                                                                                                                                                                                                                                                                                                                                                                                                                                                                                                                                                                                                                                                                                                                                                                                                                                                                                                                                                                                                                                                                                                                                                                                                                                                                                                                                                                                                                                                                                                                                                           |
| <b>Abstract:</b>              | <p><b>Background :</b> Coagulopathy and thromboembolic events are among the complications of Corona Virus disease 2019 (COVID-19). Thus, abnormal coagulation profiles in COVID-19 patients are taken as important prognostic factors of COVID-19 disease severity. The aim of this study was to analyze coagulation profiles of hospitalized COVID-19 patients in Addis Ababa, Ethiopia. <b>Methods :</b> This cross-sectional study was conducted among 455 Covid-19 patients admitted at Millennium COVID-19 treatment center, Addis Ababa, Ethiopia from July 1- October 23, 2020. Prothrombin Time (PT), Activated Partial Thromboplastin Time (APTT) and International normalized ratio (INR) were <del>estimated by</del> HUMACLOT DUE PLUS coagulation analyzer (Wiesbaden, Germany) . In all tests, <math>p &lt; 0.05</math> was defined as statistically significant. <b>Result :</b> A prolonged prothrombin time was found <del>among</del> 46.8% of study subjects with COVID-19 . Prolonged prothrombin time and high INR were seen among 53.3% severe and 51% critical patients with COVID-19 manifestation. Thrombocytopenia was detected in 22.1% of COVID-19 patients. 50.5% and 51.3% of COVID-19 patients <del>aged</del> older than 55 years had thrombocytopenia and prolonged APTT respectively. <b>Conclusion :</b></p> <p>In this study, prolonged prothrombin time and high INR were found <del>among</del> severe and critical COVID-19 patients. Thrombocytopenia and prolonged APTT were dominant in COVID-19 patients older than 55 years. Thus, we recommend emphasis to be given for monitoring of platelet count, PT, APTT and INR in hospitalized COVID-19 patients <b>management</b>.</p> |
| <b>Order of Authors:</b>      | Shambel Araya, MSc<br>Mintesnot Aragaw Mamo<br>Yakob Gebregziabher Tsegay<br>Aschalew Aytenew<br>Abebe Hordofa<br>AbebeEdao Negeso<br>Zemenu Tamir<br>Tirhas Niguse<br>Mahlet Cheru<br>Asegdew Atlaw<br>Moges Wordofa                                                                                                                                                                                                                                                                                                                                                                                                                                                                                                                                                                                                                                                                                                                                                                                                                                                                                                                                                                                                                                                                                                                                                                                                                                                                                                                                                                                                                                                                                                        |
| <b>Response to Reviewers:</b> | Cover letter<br>Shambel Araya<br>Addis Ababa University<br>Addis Ababa, Ethiopia                                                                                                                                                                                                                                                                                                                                                                                                                                                                                                                                                                                                                                                                                                                                                                                                                                                                                                                                                                                                                                                                                                                                                                                                                                                                                                                                                                                                                                                                                                                                                                                                                                             |

Email: shambelaraya8@gmail.com

Date: January 1, 2021

To: PLOS ONE Journal

Dear Editorial:

We are glad to write this response that our paper entitled "Blood coagulation parameter abnormalities among patients with confirmed COVID-19 in Ethiopia" (Submission ID: PONE-D-20-35898) has been requested to review for publication in PLOS ONE journal. We are pleased to have an opportunity to make our paper revised and we have greatly appreciated the reviewers' and editor's comments and suggestions were very helpful overall. In revising the paper, we have carefully considered reviewers' and editor's comments and suggestions on our revised submission. As instructed, we have attempted to succinctly explain changes made in reaction to all comments and reply to each comment in point-by-point fashion as follows:

#### Response to Editor's comments

##### Additional Editor comments

Comment. "This is an important and timely paper to consider the abnormalities of haematological parameters in an African context and in COVID-19 disease. There are, however, unfortunately significant numbers of typographical errors and word omissions which make the sense of the paper difficult to follow in some cases. For example, the authors refer to a "prolonged" but do not indicate which parameter. There are, in addition, a number of references which need to be included (especially in the discussion)."

Response: As suggested by the editor we thoroughly went through the manuscript and revised the typographical, grammatical, editorial, and word omissions.

##### Journal requirements

When submitting your revision, we need you to address these additional requirements.

Comment #1. "Please ensure that your manuscript meets PLOS ONE's style requirements, including those for file naming."

Response #1: we strictly followed PLOS ONE's style requirements during preparation and revision of our manuscript as suggested by the editor.

Comment #2. "Thank you for submitting the above manuscript to PLOS ONE. During our internal evaluation of the manuscript, we found significant text overlap in the Discussion, Abstract, and other sections, between your submission and the following previously published works:

- <https://applications.emro.who.int/emhj/v26/09/1020-3397-2020-2609-999-1004-eng.pdf>

- <https://www.hematology.org/COVID-19/COVID-19-and-coagulopathy>

- <https://pubmed.ncbi.nlm.nih.gov/32702124/>

We would like to make you aware that copying extracts from previous publications, especially outside the methods section, word-for-word is unacceptable. In addition, the reproduction of text from published reports has implications for the copyright that may apply to the publications.

Please revise the manuscript to rephrase the duplicated text, cite your sources, and provide details as to how the current manuscript advances on previous work. Please note that further consideration is dependent on the submission of a manuscript that addresses these concerns about the overlap in text with published work."

Response #2. As per the suggestion of the editor, we have revised different sections of manuscript to reduce text overlap with the mentioned previous studies and cite the utilized sources as follows:

•Abstract, Background section: 'Infection with corona virus disease 2019 (COVID-19) could be complicated with coagulopathy and high risk of thromboembolic events.'

Revised as "Coagulopathy and thromboembolic events are among the complications of Corona Virus disease 2019 (COVID-19)."

•Abstract, conclusion section: ‘We found an abnormal pattern of coagulation parameters and association of advanced age and co-morbidities with a high rate of mortality in severe COVID-19 patients, which should be taken into consideration in their hospital management.  
Revised as “In this study, prolonged prothrombin time and high INR were found among severe and critical COVID-19 patients. Thrombocytopenia and prolonged APTT were dominant in COVID-19 patients older than 55 years. Thus, we recommend emphasis to be given for monitoring of platelet count, PT, APTT and INR in hospitalized COVID-19 patients management.”

•Discussion part first paragraph: ‘COVID-19, which is caused by SARS-CoV-2, has spread across the globe. Although most patients recover within 1 to 3 weeks, COVID-19 has already caused >1.2 million deaths worldwide and more than 1400 in Ethiopia as of October 30,2020 according to WHO report (15). Dysregulation of coagulation produces a coagulopathy associated with hyper coagulability as evidenced by venous and arterial thrombosis and multi-organ dysfunction. Up to 20% of affected patients require hospitalization, and the mortality rate in such patients is high (16, 17). Coagulopathy is one of the most significant prognostic factors in patients with COVID-19 and is associated with increased mortality and admission to critical care (14, 18). Most commonly observed coagulopathy in patients hospitalized with COVID-19 (COVID-19-associated coagulopathy) is characterized by increased coagulation parameters like PT, APTT and INR levels (19, 20).’  
Revised as “The COVID-19 pandemic has brought major impact on health care globally. It has already caused >1.2 million deaths worldwide and more than 1400 in Ethiopia as of October 30,2020 according to WHO report(15). Coagulation abnormalities are indicated as frequent findings in COVID-19 patients and associated with poor prognosis and survival(7). Similarly, it is also indicated that coagulopathy which is resulted due to dysregulation of coagulation and associated with hypercoagulability as evidenced by venous and arterial thrombosis and multiorgan dysfunction(16); is one of the most significant prognostic factors in patients with COVID-19 and associated with increased hospitalization, admission to critical care, and mortality(14, 17-19). Previous studies indicated that coagulopathy in patients hospitalized with COVID-19 is characterized by increase in coagulation parameters such as PT, APTT and INR levels(20, 21).”

•Discussion part 3rd Paragraph: “As for all coagulopathies, treatment of the underlying condition is paramount. Experience to date suggests that COVID-19 infection infrequently leads to bleeding despite abnormal coagulation parameters (23,24). Supportive care including blood product transfusion should be individualized (24, 25). Blood component therapy should not be instituted on the basis of laboratory results alone, but reserved for those who are bleeding requires an invasive procedure, or who are otherwise at high risk for bleeding complications (25).”  
Revised as “Treatment of the underlying condition is suggested to be paramount in coagulopathies. It is shown that bleeding is not common clinical manifestation in COVID-19 infections despite abnormal coagulation parameters (23,24). Along these, it is suggested that supportive care including blood product transfusion should be individualized in COVID -19 patients (25, 26). Laboratory findings alone should not be taken as basis for instituting blood transfusion therapy, rather it should be reserved for those who are bleeding, require an invasive procedure, or who are otherwise at high risk for bleeding complications(26, 27)”

Discussion part 4th Paragraph: “Considerable evidence indicates that COVID-19 is associated with a hyper-coagulable state. Thus, despite anticoagulant thromboprophylaxis, different studies have reported that rates of venous thromboembolism (VTE) and arterial thrombosis ranging from 15% to 30% in critically ill patients with COVID-19 and ~7% in those admitted to medical wards (26-28). Clotting of access catheters, dialysis membranes, and extracorporeal circuits has also been reported. Furthermore, in patients dying from COVID-19, autopsy studies reveal unsuspected deep vein thrombosis and multiple thrombi in the vessels of the lungs, kidneys, and other organs (9, 27). These findings have prompted some clinicians to use treatment doses of heparin or low- molecular-weight heparin instead of prophylactic doses in critically ill COVID-19 patients (12,25, 29).  
Revised as “Evidences indicate that COVID-19 is associated with a hyper-coagulable state. Venous thromboembolism (VTE) and arterial thrombosis ranging from 15% to 30% were found in critically ill patients with COVID-19 and about 7% in those admitted to medical wards (28-30). Clotting is reported from different medical devices used,

deep vein thrombosis and multiple thrombi in the vessels of the lungs, kidneys and other organs from autopsy of patients died of Covid-19 (9, 29). These indicate clinicians to use therapeutic doses of heparin or low-molecular-weight heparin instead of prophylactic doses in critically ill COVID-19 patients (12, 26, 31).

•Conclusion part: “We recommend monitoring platelet count, PT, APTT and INR. Worsening of these parameters indicates progressive severity of COVID-19 infection and predicts that more aggressive critical care will be needed; experimental therapies for COVID-19 infection might be considered in this setting. Improvement of coagulation parameters along with improving clinical condition provides confidence that stepping down of aggressive treatment may be appropriate.”

Revised as “In this study, prolonged prothrombin time and high INR were found among severe and critical COVID-19 patients. Thrombocytopenia and prolonged APTT were dominant in COVID-19 patients older than 55 years. Thus, we recommend emphasis to be given for monitoring of platelet count, PT, APTT and INR in hospitalized COVID-19 patients management.

Comment #3. “Please state whether you validated the questionnaire prior to testing on study participants. Please provide details regarding the validation group within the methods section.”

Response #3. Not applicable. We did not use questionnaire in this study.

Comment #4. We note that you have indicated that data from this study are available upon request. PLOS only allows data to be available upon request if there are legal or ethical restrictions on sharing data publicly. For information on unacceptable data access restrictions, please see <http://journals.plos.org/plosone/s/data-availability#loc-unacceptable-data-access-restrictions>.

Response #4. All the available data were included in the manuscript.

Comment #5. “PLOS requires an ORCID iD for the corresponding author in Editorial Manager on papers submitted after December 6th, 2016. Please ensure that you have an ORCID iD and that it is validated in Editorial Manager. To do this, go to ‘Update my Information’ (in the upper left-hand corner of the main menu), and click on the Fetch/Validate link next to the ORCID field. This will take you to the ORCID site and allow you to create a new iD or authenticate a pre-existing iD in Editorial Manager. Please see the following video for instructions on linking an ORCID iD to your Editorial Manager account: [https://www.youtube.com/watch?v=\\_xcclfvtxQ](https://www.youtube.com/watch?v=_xcclfvtxQ)”

Response #5. “Already linked”

Comment #6. “Please amend the manuscript submission data (via Edit Submission) to include author Moges Wordofa.”

Response #6. Comment accepted and author included

Comment #7. “We note you have included a table to which you do not refer in the text of your manuscript. Please ensure that you refer to Table 1 in your text; if accepted, production will need this reference to link the reader to the Table.”

Response #7. Comment accepted and corrected accordingly.

Response to comments and suggestions inserted in the PDF format Manuscript  
Comment # 1: in the abstract section. A prolonged (insert analytical parameter that was prolonged) was present in 48.8% of study subjects with COVID-19?

Response 1: Parameter inserted and revised as “A prolonged prothrombin time was found among 46.8% of study subjects with COVID-19”

Comment # 2: In the abstract section. The comment to remove the interpretation and conclusion.

Response #2. Comment accepted and modified accordingly.

Comment #3. On Title. “Blood coagulation parameter abnormalities among in hospitalized patients with confirmed COVID-19 in Ethiopia”

Response #3: Accepted and modified as: “Blood coagulation parameter abnormalities in hospitalized patients with confirmed COVID-19 in Ethiopia”

Comment#4: in the abstract, method part: ‘...were estimated by auto analyzer.’ ‘Which parameter?’.

Response to #5. Although the comment was to indicate which parameter, since the parameter are already mentioned we perceived it as to mean which auto analyzer and inserted the specific analyzer used as\_”.....HUMACLOT DUE PLUS coagulation analyzer (Wiesbaden, Germany)”

Comment #6. In the introduction part. “ ...WHO. Write out abbreviation in full the first time it is used”.

Response #6. Corrected as suggested. ....World Health Organization(WHO).  
 Comment #7. In the laboratory analysis part, "...HUMACLOT DUE PLUS.. Insert trademark symbol e.g. R or TM."  
 Response #7. Accepted and modified as "...HUMACLOT DUE PLUS coagulation analyzer (Wiesbaden, Germany)

Comment #8. In the laboratory analysis part, "...Beckman coulter DxH 600 automated hematology analyzer.. Insert trademark symbol e.g. R or TM."  
 Response #8. Accepted and modified as "...Beckman coulter DxH 600 automated hematology analyzer

Comment #9. "Thrombocytopenia and abnormal coagulation parameters (PT, APTT and INR) could be considered as important indicators of COVID-19 disease severity. This statement belongs in the discussion section of the article."  
 Response # 9: Accepted and removed as suggested.

Comment #10. In discussion part. 'Thrombocytopenia, defined as platelet count less than  $100 \times 10^9$  cells per L were independently associated with severity. Insert reference.'  
 Response #10: Comment accepted; reference inserted as suggested.  
 "Thrombocytopenia, defined as platelet count less than  $100 \times 10^9$  cells/L were independently associated with COVID-19 severity(34)"

Comment 11. Discussion Part. "As many studies reported that the coagulopathy associated with COVID-19 is characterized by thrombocytopenia, prolongation of the prothrombin time, high levels of D-dimer, and elevated levels of fibrinogen, factor VIII, and von Willebrand factor. Insert reference"  
 Response #11. Comment accepted; reference inserted as suggested. "Many studies reported that coagulopathy associated with COVID-19 is characterized by thrombocytopenia, prolongation of the prothrombin time, high levels of D-dimer, and elevated levels of fibrinogen, factor VIII, and von Willebrand factor(3, 11, 16)."

Comment #12. Conclusion part. "We recommend monitoring platelet count, PT, APTT and INR. ...in patients hospitalized COVID-19 patients."  
 Response #12. Comment accepted and modified as "We recommend monitoring platelet count, PT, APTT and INR in hospitalized COVID-19 patients."  
 Looking forward to hearing from you. Thank you again for your consideration!  
 Sincerely,  
 Shambel Araya (BSc, MSc)  
 Corresponding author

**Additional Information:**

**Question**

**Response**

**Financial Disclosure**

The author(s) received no specific funding for this work.

Enter a financial disclosure statement that describes the sources of funding for the work included in this submission. Review the [submission guidelines](#) for detailed requirements. View published research articles from [PLOS ONE](#) for specific examples.

This statement is required for submission and **will appear in the published article** if the submission is accepted. Please make sure it is accurate.

**Unfunded studies**

Enter: *The author(s) received no specific funding for this work.*

**Funded studies**

Enter a statement with the following details:

- Initials of the authors who received each award
- Grant numbers awarded to each author
- The full name of each funder
- URL of each funder website
- Did the sponsors or funders play any role in the study design, data collection and analysis, decision to publish, or preparation of the manuscript?
- **NO** - Include this sentence at the end of your statement: *The funders had no role in study design, data collection and analysis, decision to publish, or preparation of the manuscript.*
- **YES** - Specify the role(s) played.

\* typeset

**Competing Interests**

Use the instructions below to enter a competing interest statement for this submission. On behalf of all authors, disclose any [competing interests](#) that could be perceived to bias this work—acknowledging all financial support and any other relevant financial or non-financial competing interests.

This statement **will appear in the published article** if the submission is accepted. Please make sure it is accurate. View published research articles from [PLOS ONE](#) for specific examples.

The authors have declared that no competing interests exist

**NO authors have competing interests**

Enter: *The authors have declared that no competing interests exist.*

**Authors with competing interests**

Enter competing interest details beginning with this statement:

*I have read the journal's policy and the authors of this manuscript have the following competing interests: [insert competing interests here]*

\* typeset

**Ethics Statement**

Enter an ethics statement for this submission. This statement is required if the study involved:

- Human participants
- Human specimens or tissue
- Vertebrate animals or cephalopods
- Vertebrate embryos or tissues
- Field research

Write "N/A" if the submission does not require an ethics statement.

General guidance is provided below. Consult the [submission guidelines](#) for detailed instructions. **Make sure that all information entered here is included in the Methods section of the manuscript.**

Addis Ababa University College of Health Science Department of Medical Laboratory Science research ethics review committee (DRERC) protocol number: DRERC/538/20/MLS

**Format for specific study types**

**Human Subject Research (involving human participants and/or tissue)**

- Give the name of the institutional review board or ethics committee that approved the study
- Include the approval number and/or a statement indicating approval of this research
- Indicate the form of consent obtained (written/oral) or the reason that consent was not obtained (e.g. the data were analyzed anonymously)

**Animal Research (involving vertebrate animals, embryos or tissues)**

- Provide the name of the Institutional Animal Care and Use Committee (IACUC) or other relevant ethics board that reviewed the study protocol, and indicate whether they approved this research or granted a formal waiver of ethical approval
- Include an approval number if one was obtained
- If the study involved *non-human primates*, add *additional details* about animal welfare and steps taken to ameliorate suffering
- If anesthesia, euthanasia, or any kind of animal sacrifice is part of the study, include briefly which substances and/or methods were applied

**Field Research**

Include the following details if this study involves the collection of plant, animal, or other materials from a natural setting:

- Field permit number
- Name of the institution or relevant body that granted permission

**Data Availability**

Authors are required to make all data underlying the findings described fully available, without restriction, and from the time of publication. PLOS allows rare exceptions to address legal and ethical concerns. See the [PLOS Data Policy](#) and [FAQ](#) for detailed information.

Yes - all data are fully available without restriction



A Data Availability Statement describing where the data can be found is required at submission. Your answers to this question constitute the Data Availability Statement and **will be published in the article**, if accepted.

**Important:** Stating 'data available on request from the author' is not sufficient. If your data are only available upon request, select 'No' for the first question and explain your exceptional situation in the text box.

Do the authors confirm that all data underlying the findings described in their manuscript are fully available without restriction?

**Describe where the data may be found in full sentences. If you are copying our sample text, replace any instances of XXX with the appropriate details.**

- If the data are **held or will be held in a public repository**, include URLs, accession numbers or DOIs. If this information will only be available after acceptance, indicate this by ticking the box below. For example: *All XXX files are available from the XXX database (accession number(s) XXX, XXX).*
- If the data are all contained **within the manuscript and/or Supporting Information files**, enter the following: *All relevant data are within the manuscript and its Supporting Information files.*
- If neither of these applies but you are able to provide **details of access elsewhere**, with or without limitations, please do so. For example:

*Data cannot be shared publicly because of [XXX]. Data are available from the XXX Institutional Data Access / Ethics Committee (contact via XXX) for researchers who meet the criteria for access to confidential data.*

*The data underlying the results presented in the study are available from (include the name of the third party*

All relevant data are within the manuscript

|                                                                                                                                                                                                                                         |  |
|-----------------------------------------------------------------------------------------------------------------------------------------------------------------------------------------------------------------------------------------|--|
| <p><i>and contact information or URL).</i></p> <ul style="list-style-type: none"><li>• This text is appropriate if the data are owned by a third party and authors do not have permission to share the data.</li></ul> <p>* typeset</p> |  |
| Additional data availability information:                                                                                                                                                                                               |  |

1 ***Blood coagulation parameter abnormalities in hospitalized patients with***  
2 ***confirmed COVID-19 in Ethiopia***

3 Shambel Araya<sup>1&2</sup>, Mintesnot Aragaw Mamo <sup>1&2</sup>, Yakob Gebregziabher Tsegay<sup>3&4</sup>, Asegdew Atlaw<sup>2</sup>,  
4 Aschalew Aytene<sup>2</sup>, Abebe Hordofa<sup>2</sup>, Abebe Edao Negeso<sup>1</sup>, Moges Wordofa<sup>1</sup>, Tirhas Niguse<sup>1</sup>, Mahlet  
5 Cheru<sup>1</sup>, Zemenu Tamir<sup>1</sup>

6 <sup>1</sup>Department of Medical Laboratory Sciences, College of Health Sciences, Addis Ababa  
7 University, Addis Ababa, Ethiopia

8 <sup>2</sup>Department of Medical Laboratory, Millennium COVID-19 Treatment and Care Centre,  
9 St. Paul Hospital Millennium Medical College, Addis Ababa, Ethiopia;

10 <sup>3</sup>Department of Medical Biotechnology, Institute of Biotechnology, University of  
11 Gondar, Gondar, Ethiopia.

12 <sup>4</sup>Department of Research and development center, College of Health Sciences, Defense  
13 University, Addis Ababa, Ethiopia.

14 Address:

15 1. Shambel Araya (corresponding author); [shambelaraya8@gmail.com](mailto:shambelaraya8@gmail.com)

16 2. Mintesnot Aragaw Mamo: [mintsh2015@gmail.com](mailto:mintsh2015@gmail.com)

17 3. Yakob Gebregziabher Tsegay: [yakobtsegay17@gmail.com](mailto:yakobtsegay17@gmail.com)

18 4. Asegdew Atlaw: [asegdew21@gmail.com](mailto:asegdew21@gmail.com)

19 5. Aschalew Aytene: [aschu9033@gmail.com](mailto:aschu9033@gmail.com)

20 6. Abebe Hordofa: [abuhordofa@gmail.com](mailto:abuhordofa@gmail.com)

21 7. Abebe Edao Negeso: [abenegesso@gmail.com](mailto:abenegesso@gmail.com)

22 8. Moges Wordofa: [heranmakmow@gmail.com](mailto:heranmakmow@gmail.com)

23 9. Tirhas Niguse: [peace.for.all.060610@gmail.com](mailto:peace.for.all.060610@gmail.com)

24 10. Mahlet Cheru: [yuluyaya54@gmail.com](mailto:yuluyaya54@gmail.com)

25 11. Zemenu Tamir: [zemenut266@gmail.com](mailto:zemenut266@gmail.com)

26 **Abstract** 

27 **Background:** Coagulopathy and thromboembolic events are among the complications of Corona  
28 Virus disease 2019 (COVID-19). Thus, abnormal coagulation profiles in COVID-19 patients are  
29 taken as important prognostic factors of COVID-19 disease severity. The aim of this study was  
30 to analyze coagulation profiles of hospitalized COVID-19 patients in Addis Ababa, Ethiopia.

31 **Methods:** This cross-sectional study was conducted among 455 Covid-19 patients admitted at  
32 Millennium COVID-19 treatment center, Addis Ababa, Ethiopia from July 1- October 23, 2020.  
33 Prothrombin Time (PT), Activated Partial Thromboplastin Time (APTT) and International  
34 normalized ratio (INR) were estimated by HUMACLOT DUE PLUS coagulation analyzer  
35 (Wiesbaden, Germany). In all tests,  $p < 0.05$  was defined as statistically significant.

36 **Result:** A prolonged prothrombin time was found among 46.8% of study subjects with COVID-  
37 19. Prolonged prothrombin time and high INR were seen among 53.3% severe and 51% critical  
38 patients with COVID-19 manifestation. Thrombocytopenia was detected in 22.1% of COVID-19  
39 patients. 50.5% and 51.3% of COVID-19 patients aged older than 55 years had  
40 thrombocytopenia and prolonged APTT respectively.

41 **Conclusion:**

42 In this study, prolonged prothrombin time and high INR were found among severe and critical  
43 COVID-19 patients. Thrombocytopenia and prolonged APTT were dominant in COVID-19  
44 patients older than 55 years. Thus, we recommend emphasis to be given for monitoring of  
45 platelet count, PT, APTT and INR in hospitalized COVID-19 patients management.

46 **Key words:** COVID-19, Prothrombin time, activated partial thromboplastin time, international  
47 normalized ratio, Platelet, Addis Ababa, Ethiopia.

## 49 **Introduction**

50 Coronavirus disease 2019 (COVID-19) is caused by a novel beta corona virus called severe acute  
51 respiratory syndrome coronavirus 2 (SARS-CoV-2)(1). COVID-19 has become a pandemic that  
52 has heavily affected the global population. As of November 8, 2020, there have been 49,578,590  
53 confirmed cases of COVID-19 and 1,245,717 deaths, reported to World Health organization  
54 (WHO). Similarly, there have been 99,204 confirmed cases of COVID-19 with 1,518 deaths in  
55 Ethiopia(2).

56 The severity of COVID-19 varies considerably from asymptomatic to life threatening, lung  
57 injury being the main clinical manifestation. Most of the patients have a favorable prognosis, but  
58 some rapidly progress to severe and critical cases with respiratory distress syndrome, coagulation  
59 dysfunction and multiple organ failures (3, 4). Although the pathophysiology and the underlining  
60 mechanisms of clinical manifestations remain unclear, thrombo-inflammation and cytokine  
61 storm are clearly established components in Severe Acute Respiratory Distress Syndrome  
62 (SARS) of COVID-19(5-8).

63 Coagulopathy and abnormal coagulation profiles were indicated among the most significant  
64 markers of poor prognosis in COVID-19 patients (9-11). A retrospective cohort study conducted  
65 in Spain Madrid ~~showed~~ COVID-19 non-survivors had significantly lower prothrombin activity,  
66 abnormal coagulation parameters like prolonged PT, APTT, higher D- dimer and higher  
67 fibrinogen levels compared to survivors indicating coagulation parameters could be an efficient  
68 measure for ~~improving the clinical management and~~ predicting the prognosis of patients with  
69 SARS COV-2(7).  Similarly, Long et al has reported that occurrence of coagulation dysfunction  
70 is more likely in severe and critically ill patients. The study also showed that D-dimer and  
71 prothrombin time could be considered as main indicators in predicting the mortality of COVID-

72 19 patients(3). ~~Different studies also support that COVID-19 patients are at high risk of~~  
73 ~~developing disseminated intravascular coagulation~~ (12, 13).

74 ~~It is also indicated that comparison of reports from various populations related to the clinical~~  
75 ~~course, outcome of COVID-19 and blood coagulation profile in these patients are necessary to~~  
76 ~~help the management and treatment of the disease~~ (12, 14). Moreover, ~~this routine coagulation~~  
77 ~~parameter tests could be used as potential indicators for COVID-19 in individuals having typical~~  
78 ~~clinical manifestations that would be inputs for prompt patient management especially in~~  
79 ~~resource limited settings where the high-tech gold standard RT-PCR is not widely available, like~~  
80 ~~Ethiopia~~. However, data on coagulation profiles among Ethiopian COVID-19 patients ~~is scarce~~.  
81 Thus, the aim of this study was to ~~find out~~ the coagulation profile of COVID-19 patients  
82 admitted at Millennium COVID-19 treatment center, Addis Ababa, Ethiopia.

### 83 *Methods*

84 ***Ethical consideration:*** The study was approved by Addis Ababa University College of Health  
85 Sciences, department of Medical Laboratory Sciences research ethics review committee  
86 (DRERC/538/20/MLS) and it was in accordance with the principles of the Helsinki II  
87 declaration. Laboratory test results were communicated to the responsible clinicians working at  
88 the treatment center. Written informed consent was obtained from the study participants. All the  
89 information obtained from the study participants were kept confidential.

### 90 *Study population*

91 In this study, we have included 455 consecutive patients with confirmed SARS-CoV-2 infection  
92 ~~and~~ admitted to Millennium COVID-19 treatment center, Addis Ababa, Ethiopia from July 1-  
93 October 23, 2020. The treatment center is the first referral center of COVID-19 patients in

94 Ethiopia, since May 02, 2020. None of the study participants ~~was~~ taking anticoagulant  
95 medications before blood drawing. Diagnosis of SARS-CoV-2 infection was made according to  
96 real time PCR.

## 97 *Sample collection and coagulation profile analysis*

### 98 **2.6. Laboratory Analysis**

99 ~~Eight milliliters of venous blood were~~ collected by professional nurses working in the treatment  
100 center: ~~five milliliters~~ in EDTA for platelet count, ~~three milliliters in~~ 3.2% sodium citrated anti-  
101 coagulated tube for analysis of coagulation parameters. The samples for coagulation tests were  
102 collected at hospital admission. The prothrombin time (PT), activated partial prothrombin time  
103 (APTT), and international normalized ratio (INR) were analyzed using HUMACLOT DUE  
104 PLUS<sup>®</sup> coagulation analyzer (Wiesbaden, Germany). Platelet count was performed using  
105 UniCel<sup>®</sup> DxH 800 Coulter<sup>®</sup> Cellular Analysis System (Beckman Coulter, Inc. 4300 N. Harbor  
106 Blvd. Fullerton, CA 92835). The coagulation parameters were compared with the manufacturer  
107 cut off normal range of PT = 11.7- 15 seconds, APTT = 23.8- 37.9 seconds, INR = 1.0- 1.2 and  
108 PLT= 159-386/ $\mu$ .l. The coagulation parameters above the cut off range were considered as a  
109 prolonged time and thrombocytopenia in the case of lower than cut off value for platelet. All  
110 laboratory tests and its interpretation were done following the manufacturers' recommendation  
111 and standard operating procedures.

### 112 ***Statistical Analysis***

113 Statistical Package for the Social Sciences (SPSS) software version 25.0 (SPSS Inc., Chicago,  
114 IL, USA) was used for statistical analysis. Chi-square test was used to determine association

115 among categorical variables. The quantitative data were expressed as Mean  $\pm$  SD. P value < 0.05  
116 was considered as statistically significant.

## 117 **Results**

### 118 ***Socio-demographic and Clinical characteristics of Study participants***

119 In this study, 455 patients diagnosed with COVID-19 were included. Among the study  
120 participants, 289 (63.5%) were males. The study participants were between the age of 4 and 90  
121 years with a mean of 49.9  $\pm$ 18.3 years. From the total 455 case, there were 297 mild cases, 90  
122 severe cases, and 68 critical cases based on disease severity of COVID-19 (Table 1).

123 **Table 1:** Socio-demographic characteristics of study participants ~~Addis Ababa, Ethiopia, 2020~~

| Variables        |             | Frequency | Percent |
|------------------|-------------|-----------|---------|
| Gender           | Male        | 289       | 63.5%   |
|                  | Female      | 166       | 36.5%   |
| Age group        | 0-18 years  | 15        | 3.2%    |
|                  | 18-35 years | 101       | 22.1%   |
|                  | 36-55 years | 158       | 34.7%   |
|                  | >55 years   | 181       | 39.7%   |
| Disease severity | Moderate    | 297       | 65.2%   |
|                  | Severe      | 90        | 19.8%   |
|                  | Critical    | 68        | 15%     |



124 The median time from the disease onset to admission was 4 days (2-8 days). Severe and critical  
 125 groups showed differences in sex ratio and age distribution. In severe and critical groups,  
 126 majority were males and elderly (Table 2).

127 **Table 2: Socio-demographic characteristics and disease severity of COVID-19 patients**  
 128 **~~admitted to Millennium COVID-19 treatment center Addis Ababa, Ethiopia~~**

| Variables     |               | Disease Severity |               |                 | P-value |
|---------------|---------------|------------------|---------------|-----------------|---------|
|               |               | Moderate, n (%)  | Severe, n (%) | Critical, n (%) |         |
| Age(year)     | 0-18, n= 15   | 10(66.7)         | 4(26.7)       | 1(6.7)          | 0.283   |
|               | 18-35, n=101  | 65(64.35)        | 22(21.78)     | 14(13.8)        |         |
|               | 36-55, n=158  | 107(67.7)        | 31(19.6)      | 20(12.65)       |         |
|               | >55, n=181    | 115(63.5)        | 33(18.2)      | 33(8.2)         |         |
| Sex,<br>N=455 | Male, n=289   | 187(64.7)        | 56(19.3)      | 46(15.9)        | 0.045   |
|               | Female, n=166 | 110(66.2)        | 34(20.4)      | 22(13.2)        |         |

129 ***Magnitude of coagulation abnormalities***

130 In this study, 209 COVID-19 patients (46%) showed prolonged PT and higher INR values.  
 131 Among those patients with prolonged PT, 51.3% were above 55 years of age. Prolonged PT  
 132 value was found among males (49.8%) than females (41%) and it has a significant association  
 133 with gender (P = 0.045). Similarly, 51.4% and 53.3% of ICU (critical) and severe patients had  
 134 prolonged PT values. Notably, prolonged APTT values were found among 43.1% of individuals,  
 135 and from these 47%, 45% and 41% were among ICU (critical), severe and moderate patients,  
 136 respectively. 57.2% of female patients had prolonged APTT; and 51.3% of patients aged older  
 137 than 55 years had a prolonged APTT.

138 Thrombocytopenia was detected in 22.1% (101 out of 455) ~~22.1% individuals~~. 50.5% (50 out of  
 139 99) patients aged older than 55 years had thrombocytopenia. ~~Thrombocytopenia was higher~~  
 140 among male (23.8%) than female (18%) ICU patients (Table 3).

141 **Table 3: Coagulation parameters in patients with severe COVID-19 according to different variables**

| Coagulation Parameters |              | Variables |            |            |           |           |             |                  |             |               |
|------------------------|--------------|-----------|------------|------------|-----------|-----------|-------------|------------------|-------------|---------------|
|                        |              | Age       |            |            |           | Sex       |             | Disease Severity |             |               |
|                        |              | 0-18 n(%) | 19-35 n(%) | 36-55 n(%) | >55 n(%)  | Male n(%) | Female n(%) | Moderate n(%)    | Severe n(%) | Critical n(%) |
| PT                     | High n=213   | 9(4.2)    | 50(23.47)  | 61(28.6)   | 93(43.6)  | 144(67.6) | 69(32.4)    | 130(61)          | 48(22.5)    | 35(16.4)      |
|                        | Normal n=220 | 6(2.7)    | 45(20.45)  | 89(40.4)   | 80(36.3)  | 131(59.5) | 89(40.4)    | 149(67.7)        | 40(18.1)    | 31(14.1)      |
|                        | Low=22       | 0         | 6(27.2)    | 8(36.3)    | 8(36.3)   | 14(63.6)  | 8(36.3)     | 18(81)           | 2(9)        | 2(9)          |
| APTT                   | High=196     | 6(3)      | 46(23.4)   | 68(34.7)   | 76(38.77) | 101(51.5) | 95(48.5)    | 115(58.67)       | 41(21)      | 42(21.4)      |
|                        | Normal n=193 | 6(3.1)    | 38(19.7)   | 70(36.2)   | 79(41)    | 136(70.4) | 57(29.5)    | 137(71)          | 36(18.6)    | 21(10.8)      |
|                        | Low n=66     | 3(4.5)    | 17(25.7)   | 20(30.3)   | 26(39.3)  | 52(78.7)  | 14(21)      | 45(68)           | 13(19.7)    | 5(7.5)        |
| PLT                    | High n=65    | 4(6.1)    | 11(17)     | 24(37)     | 26(40)    | 43(66)    | 22(33.8)    | 39(60)           | 8(12.3)     | 8(12.3)       |
|                        | Normal n=289 | 8(3)      | 70(24.2)   | 105(36.3)  | 105(36.3) | 175(60.8) | 114(39)     | 214(74)          | 44(15)      | 31(10.6)      |
|                        | Low n= 101   | 3(2.9)    | 20(20)     | 28(27.7)   | 50(49.5)  | 69(69.70) | 30(30.3)    | 33(32)           | 38(37.6)    | 30(29.7)      |
| INR                    | High n=210   | 9(4.2)    | 50(24.7)   | 60(28.5)   | 91(43.3)  | 141(67)   | 69(32.8)    | 127(60.4)        | 50(23.8)    | 33(15.7)      |
|                        | Normal =224  | 5(2.2)    | 44(19.6)   | 93(41.5)   | 82(36.6)  | 115(51)   | 75(33.4)    | 113(50.4)        | 45(20)      | 32(14.2)      |
|                        | Low n=21     | 1(4.7)    | 7(33.3)    | 5(23.8)    | 8(38)     | 14(66.6)  | 7(33.3)     | 15(71)           | 3(14.5)     | 3(14.5)       |

142 PLT=platelet; PT= prothrombin time; APTT=activated partial thromboplastin time;

143 INR=international normalized ratio.

144 **Discussion**

145 The COVID-19 pandemic has brought major impact on health care globally. COVID-19 has  
146 already caused >1.2 million deaths worldwide and more than 1400 in Ethiopia as of October  
147 30,2020 according to WHO report(15). Coagulation abnormalities are indicated as frequent  
148 findings in COVID-19 patients and associated with poor prognosis and survival(7). Similarly, it  
149 is also indicated that coagulopathy which is resulted due to dysregulation of coagulation and  
150 associated with hypercoagulability as evidenced by venous and arterial thrombosis and  
151 multiorgan dysfunction(16); is one of the most significant prognostic factors in patients with  
152 COVID-19 and is associated with increased hospitalization, admission to critical care, and  
153 mortality(14, 17-19). Previous studies indicated that coagulopathy in patients hospitalized with  
154 COVID-19 is characterized by increase in coagulation parameters such as PT, APTT and INR  
155 levels(20, 21).

156 Patients with serious infection are more likely to have COVID-19 associated coagulopathy than  
157 patients with a mild infection (21,22). In our study, prolonged PT, APTT an INR was found  
158 among severe and critical COVID-19 patients than moderate ones. Similarly, studies also  
159 reported that thrombotic complications are common among COVID-19 patients admitted to  
160 intensive care unit (ICU) (9.5%-47%)(22-24).

161 Treatment of the underlying condition is suggested to be paramount in coagulopathies. It is  
162 shown that bleeding is not common clinical manifestation in COVID-19 infections despite  
163 abnormal coagulation parameters (23,24). Along these, it is suggested that supportive care  
164 including blood product transfusion should be individualized in COVID -19 patients(25, 26).  
165 Laboratory findings alone should not be taken as basis for instituting blood transfusion therapy,  
166 rather it should be reserved for those who are bleeding, requires an invasive procedure, or who  
167 are otherwise at high risk for bleeding complications (26, 27).

168 ~~Evidences~~ indicate that COVID-19 is associated with a hyper-coagulable state. Venous  
169 thromboembolism (VTE) and arterial thrombosis ranging from 15% to 30% were found in  
170 critically ill patients with COVID-19 and about 7% in those admitted to medical wards (28-30).  
171 ~~Clotting is reported from~~ different medical devices ~~used~~, deep vein thrombosis and multiple  
172 thrombi in the vessels of the lungs, kidneys and other organs ~~from~~ autopsy of patients died of  
173 Covid-19 (9, 29). ~~These indicate clinicians to use~~ therapeutic doses of heparin or low-molecular-  
174 weight heparin instead of prophylactic doses in critically ill COVID-19 patients (12, 26, 31). In  
175 the current study, thrombocytopenia was observed among males (23.8%) than females (19.8%)  
176 and older people (27.6%). Severe (42.68%) and critical (42%) patients also had  
177 thrombocytopenia and this was in line with studies conducted in different countries (20, 22, 32,  
178 33). Thrombocytopenia, defined as platelet count less than  $100 \times 10^9$  cells/L were independently  
179 associated with COVID-19 severity(34). Studies ~~across~~ suggested that routine coagulation tests  
180 can be considered as a significant marker to help clinicians assess prognosis and severity of  
181 ~~patients with COVID-19~~. In critically ill patients, thrombocytopenia correlates with multi-organ  
182 failure and death, and a decline in platelet count, even in the absence of overt thrombocytopenia,  
183 portends a worse outcome (9, 12, 13). In patients who are not bleeding, there is no evidence that  
184 correction of laboratory parameters with blood products improves outcomes. Replacement might  
185 worsen disseminated thrombosis and further deplete scarce blood products (28, 35).

186 Many studies reported that coagulopathy associated with COVID-19 is characterized by  
187 thrombocytopenia, prolongation of the prothrombin time, high levels of D-dimer, and elevated  
188 levels of fibrinogen, factor VIII, and von Willebrand factor (3, 11, 16). The degree of  
189 coagulation abnormalities ~~correlates~~ correlates with disease severity and predict the risk of thrombosis, the  
190 need for ventilator support, and mortality. COVID-19-associated coagulopathy is however

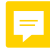

191 unique with a much decreased platelet count (9, 36-38) Patients with critical COVID-19  
192 infection and a cytokine storm have an extreme hyper-coagulable state. Even though the reason  
193 for this life-threatening condition is not known, this might be due to an uncontrolled hyper-  
194 inflammatory response without previous immunity (39, 40).

195 **Conclusion:** In this study, prolonged prothrombin time and high INR were found among severe  
196 and critical COVID-19 patients. Thrombocytopenia and prolonged APTT were dominant in  
197 COVID-19 patients older than 55 years. Thus, we recommend emphasis to be given for  
198 monitoring of platelet count, PT, APTT and INR in hospitalized COVID-19 patients  
199 management.

200 **Consent for publication:** Not applicable

201 **Availability of data and material**

202 All the available data are included in the manuscript.

203 **Funding:** none

204 **Conflict of interest:** The authors declare that they have no conflict of interest.

## 205 References

- 206 1. Sohrabi C, Alsafi Z, O'Neill N, Khan M, Kerwan A, Al-Jabir A, et al. World Health Organization declares  
207 global emergency: A review of the 2019 novel coronavirus (COVID-19). *Int J Surg.* 2020;76:71-6.
- 208 2. World Health Organization. Who coronavirus disease (covid-19) dashboard 2020, November 8 [Available  
209 from: <https://covid19.who.int/info>.
- 210 3. Long H, Nie L, Xiang X, Li H, Zhang X, Fu X, et al. D-Dimer and Prothrombin Time Are the Significant  
211 Indicators of Severe COVID-19 and Poor Prognosis. *BioMed research international.* 2020;2020:6159720.
- 212 4. Guan WJ, Ni ZY, Hu Y, Liang WH, Ou CQ, He JX, et al. Clinical Characteristics of Coronavirus Disease  
213 2019 in China. *The New England journal of medicine.* 2020;382(18):1708-20.
- 214 5. Aggarwal M, Dass J, Mahapatra M. Hemostatic Abnormalities in COVID-19: An Update. *Indian J Hematol*  
215 *Blood Transfus.* 2020:1-11.
- 216 6. Coccheri S. COVID-19: The crucial role of blood coagulation and fibrinolysis. *Intern Emerg Med.*  
217 2020;15(8):1369-73.

- 218 7. Quintana-Díaz M, Andrés-Esteban EM, Ramírez-Cervantes KL, Olivan-Blázquez B, Juárez-Vela R, Gea-  
219 Caballero V. Coagulation Parameters: An Efficient Measure for Predicting the Prognosis and Clinical Management  
220 of Patients with COVID-19. *Journal of Clinical Medicine*. 2020;9(11).
- 221 8. Parasher A. COVID-19: Current understanding of its pathophysiology, clinical presentation and treatment.  
222 *Postgrad Med J*. 2020.
- 223 9. Al-Samkari H, Karp Leaf RS, Dzik WH, Carlson JCT, Fogerty AE, Waheed A, et al. COVID-19 and  
224 coagulation: bleeding and thrombotic manifestations of SARS-CoV-2 infection. *Blood*. 2020;136(4):489-500.
- 225 10. Annunziata A, Imitazione P, Polistina GE, Lanza M, Coppola A, Fiorentino G. Pulmonary Embolism in  
226 Covid-19: Coagulation Parameters, Close Monitoring to Prevent? *Turk Thorac J*. 2020;21(4):287-8.
- 227 11. Savioli F, Rocha LL. Coagulation profile in severe COVID-19 patients: what do we know so far? *Revista*  
228 *Brasileira de Terapia Intensiva*. 2020;32(2).
- 229 12. Buioni D, Nardi P, Ruvolo G. Thrombocytopenia and coagulation disorders due to COVID 19 infection  
230 with concomitant cardiovascular diseases requiring anti-platelet and anticoagulant therapy, which strategy? *Clin*  
231 *Chim Acta*. 2020;508:109.
- 232 13. Levi M. COVID-19 coagulopathy vs disseminated intravascular coagulation. *Blood Adv*. 2020;4(12):2850.
- 233 14. Quintana-Díaz M, Andres-Esteban EM, Ramirez-Cervantes KL, Olivan-Blazquez B, Juarez-Vela R, Gea-  
234 Caballero V. Coagulation Parameters: An Efficient Measure for Predicting the Prognosis and Clinical Management  
235 of Patients with COVID-19. *J Clin Med*. 2020;9(11).
- 236 15. WHO. COVID19. 2020. Contract No.:
- 237 .
- 238 16. Chan NC, Weitz JI. COVID-19 coagulopathy, thrombosis, and bleeding. *Blood*. 2020;41:100648.
- 239 17. Rauch A, Labreuche J, Lassalle F, Goutay J, Caplan M, Charbonnier L, et al. Coagulation biomarkers are  
240 independent predictors of increased oxygen requirements in COVID-19. *J Thromb Haemost*. 2020.
- 241 18. Zhang Y, He L, Chen H, Lu S, Xiong Y, Liu J, et al. Manifestations of blood coagulation and its relation to  
242 clinical outcomes in severe COVID-19 patients: Retrospective analysis. *Int J Lab Hematol*. 2020.
- 243 19. Zhang A, Leng Y, Zhang Y, Wu K, Ji Y, Lei S, et al. Meta-analysis of coagulation parameters associated  
244 with disease severity and poor prognosis of COVID-19. *International journal of infectious diseases : IJID : official*  
245 *publication of the International Society for Infectious Diseases*. 2020;100:441-8.
- 246 20. Luo HC, You CY, Lu SW, Fu YQ. Characteristics of coagulation alteration in patients with COVID-19.  
247 *Ann Hematol*. 2020.
- 248 21. Levi M, Thachil J, Iba T, Levy JH. Coagulation abnormalities and thrombosis in patients with COVID-19.  
249 *Lancet Haematol*. 2020;7(6):e438-e40.
- 250 22. Zou Y, Guo H, Zhang Y, Zhang Z, Liu Y, Wang J, et al. Analysis of coagulation parameters in patients  
251 with COVID-19 in Shanghai, China. *Biosci Trends*. 2020;14(4):285-9.
- 252 23. Sayad B, Rahimi Z. Blood coagulation parameters in patients with severe COVID-19 from Kermanshah  
253 Province, Islamic Republic of Iran. *East Mediterr Health J*. 2020;26(9):999-1004.
- 254 24. Adam EH, Zacharowski K, Miesbach W. A comprehensive assessment of the coagulation profile in  
255 critically ill COVID-19 patients. *Thromb Res*. 2020;194:42-4.
- 256 25. Paar V, Wernly B, Zhou Z, Motloch LJ, Hoppe UC, Egle A, et al. Anti-coagulation for COVID-19  
257 treatment: both anti-thrombotic and anti-inflammatory? *J Thromb Thrombolysis*. 2020.
- 258 26. Belen-Apak FB, Sarialioglu F. Pulmonary intravascular coagulation in COVID-19: possible pathogenesis  
259 and recommendations on anticoagulant/thrombolytic therapy. *J Thromb Thrombolysis*. 2020;50(2):278-80.
- 260 27. Lee AY, Connors JM, Kreuziger LB, Murphy M, Gernsheimer T, Lin Y, et al. COVID-19 and  
261 Coagulopathy 2020, December 1 [Available from: [https://www.hematology.org/COVID-19/COVID-19-and-](https://www.hematology.org/COVID-19/COVID-19-and-coagulopathy)  
262 [coagulopathy](https://www.hematology.org/COVID-19/COVID-19-and-coagulopathy)].
- 263 28. Harenberg J, Favaloro E. COVID-19: progression of disease and intravascular coagulation - present status  
264 and future perspectives. *Clin Chem Lab Med*. 2020;58(7):1029-36.
- 265 29. Pizzi R, Gini G, Caiano L, Castelli B, Dotan N, Magni F, et al. Coagulation parameters and venous  
266 thromboembolism in patients with and without COVID-19 admitted to the Emergency Department for acute  
267 respiratory insufficiency. *Thromb Res*. 2020;196:209-12.
- 268 30. Voicu S, Delrue M, Chousterman BG, Stepanian A, Bonnin P, Malissin I, et al. Imbalance between  
269 procoagulant factors and natural coagulation inhibitors contributes to hypercoagulability in the critically ill COVID-  
270 19 patient: clinical implications. *Eur Rev Med Pharmacol Sci*. 2020;24(17):9161-8.
- 271 31. Mei H, Hu Y. [Characteristics, causes, diagnosis and treatment of coagulation dysfunction in patients with  
272 COVID-19]. *Zhonghua Xue Ye Xue Za Zhi*. 2020;41(3):185-91.

- 273 32. Bao C, Tao X, Cui W, Yi B, Pan T, Young KH, et al. SARS-CoV-2 induced thrombocytopenia as an  
274 important biomarker significantly correlated with abnormal coagulation function, increased intravascular blood clot  
275 risk and mortality in COVID-19 patients. *Exp Hematol Oncol.* 2020;9:16.
- 276 33. Xiong M, Liang X, Wei YD. Changes in blood coagulation in patients with severe coronavirus disease  
277 2019 (COVID-19): a meta-analysis. *Br J Haematol.* 2020;189(6):1050-2.
- 278 34. Kander T. Coagulation disorder in COVID-19. *The Lancet Haematology.* 2020;7(9):e630-e2.
- 279 35. Song JC, Wang G, Zhang W, Zhang Y, Li WQ, Zhou Z, et al. Chinese expert consensus on diagnosis and  
280 treatment of coagulation dysfunction in COVID-19. *Mil Med Res.* 2020;7(1):19.
- 281 36. Chen X, Wang Q, Xu M, Li C. A Retrospective Analysis of the Coagulation Dysfunction in COVID-19  
282 Patients. *Clin Appl Thromb Hemost.* 2020;26:1076029620964868.
- 283 37. Pavoni V, Ganesello L, Pazzi M, Stera C, Meconi T, Frigieri FC. Evaluation of coagulation function by  
284 rotation thromboelastometry in critically ill patients with severe COVID-19 pneumonia. *J Thromb Thrombolysis.*  
285 2020;50(2):281-6.
- 286 38. Savioli F, Rocha LL. Coagulation profile in severe COVID-19 patients: what do we know so far? *Rev Bras*  
287 *Ter Intensiva.* 2020;32(2):197-9.
- 288 39. Jose RJ, Manuel A. COVID-19 cytokine storm: the interplay between inflammation and coagulation.  
289 *Lancet Respir Med.* 2020;8(6):e46-e7.
- 290 40. Kasinathan G, Sathar J. Haematological manifestations, mechanisms of thrombosis and anti-coagulation in  
291 COVID-19 disease: A review. *Ann Med Surg (Lond).* 2020;56:173-7.

1 ***Blood coagulation parameter abnormalities ~~among~~ in hospitalized patients with***  
2 ***confirmed COVID-19 in Ethiopia***

Formatted: Numbering: Continuous

3 Shambel Araya<sup>1&2</sup>, Mintesnot Aragaw Mamo<sup>2&3</sup>, Yakob Gebregziabher Tsegay<sup>2&4</sup>, Aschalew  
4 Aytenew<sup>2&3</sup>, Abebe Hordofa<sup>2</sup>, Abebe Edao Negeso<sup>1</sup>, Moges Wordofa<sup>1</sup>, Zemenu Tamir<sup>1</sup>, Tirhas  
5 Niguse<sup>1</sup>, Mahlet Cheru<sup>1</sup>, Asegdew Atlaw<sup>2</sup>

- 6 1. Department of Medical Laboratory Sciences, College of Health Sciences, Addis Ababa  
7 University, Addis Ababa, Ethiopia  
8 2. Millennium COVID-19 treatment center, Addis Ababa, Ethiopia  
9 3. St. Paul hospital millennium medical college, Addis Ababa, Ethiopia  
10 4. College of Health Science, Defense University Addis Ababa, Ethiopia

11 Adress:

- 12 1. Shambel Araya (corresponding author); [shambelaraya8@gmail.com](mailto:shambelaraya8@gmail.com)  
13 2: Mintesnot Aragaw Mamo: [mintsh2015@gmail.com](mailto:mintsh2015@gmail.com)  
14 3: Yakob Gebreegziabher Tsegaye: [yakobtsegay17@gmail.com](mailto:yakobtsegay17@gmail.com)  
15 4: Aschalew Aytenew: [aschu9033@gmail.com](mailto:aschu9033@gmail.com)  
16 5: Abebe Hordofa: [abuhordofa@gmail.com](mailto:abuhordofa@gmail.com)  
17 6: Abebe Edao Negeso: [abenegesso@gmail.com](mailto:abenegesso@gmail.com)  
18 7: Moges Wordofa: [heranmakmow@gmail.com](mailto:heranmakmow@gmail.com)  
19 8: Zemenu Tamir: [zemenut266@gmail.com](mailto:zemenut266@gmail.com)  
20 9: Tirhas Niguse; [peace.for.all.060610@gmail.com](mailto:peace.for.all.060610@gmail.com)  
21 10. Mahlet Cheru: [yuluyaya54@gmail.com](mailto:yuluyaya54@gmail.com)  
22 11. Asegdew Atlaw: [asegdew21@gmail.com](mailto:asegdew21@gmail.com)



23 **Abstract**

24 **Background:** ~~Infection with Coagulopathy and thromboembolic events are among the~~  
25 ~~complications of Ceorona Vvirus disease 2019 (COVID-19).\_ could be complicated with~~  
26 ~~coagulopathy and high risk of thromboembolic events. Currently Thus, a~~ abnormal coagulation  
27 profiles in COVID-19 patients are taken as ~~an~~ important prognostic factors of ~~disease~~ severity.  
28 The aim of ~~this~~ study was ~~to~~ analyzing coagulation profiles of ~~admitted hospitalized COVID-~~  
29 ~~19 patients, with COVID 19 from in~~ Addis Ababa, Ethiopia. **Methods:** This cross-sectional  
30 study was conducted among 455 Covid-19 patients admitted at Millennium COVID-19 treatment  
31 center, Addis Ababa, Ethiopia from ~~July 1- October 23, 2020~~ June 2020 to October 2020.  
32 Prothrombin Time (PT), Activated Partial Thromboplastin Time (APTT) and International  
33 normalized ratio (INR) were estimated by ~~HUMACLOT DUE PLUS coagulation analyzer~~  
34 ~~(Wiesbaden, Germany) auto analyzer~~. In all tests,  $p < 0.05$  was defined as statistically significant.  
35 **Result:** A prolonged prothrombin time ~~has been reported in up to~~ was found among 46.8% of  
36 study subjects with COVID-19 ~~clinical conditions~~. Prolonged prothrombin time and high INR  
37 ~~was were~~ seen among 53.3% severe and 51% critical patients with COVID-19 manifestation. ~~An~~  
38 ~~increase in coagulation parameters is the most significant change in coagulation parameters in~~  
39 ~~severe COVID 19 patients, and progressively increasing values can be used as a prognostic~~  
40 ~~parameter indicating a worse outcome in older peoples (93 patients aged >55 years had a~~  
41 ~~coagulopathy).~~ Thrombocytopenia was detected in ~~around 101/455 (22.1%)~~ of  
42 ~~individuals~~ COVID-19 patients, 50.5% ~~and 51.3%.~~ ~~individual's of COVID-19 aged~~ patients aged  
43 older than 55 years had thrombocytopenia ~~and prolonged APTT~~ respectively.

44 **Conclusion:**

45 In this study, prolonged prothrombin time and high INR were found among severe and critical  
46 COVID-19 patients. Thrombocytopenia and prolonged APTT were dominant in COVID-19  
47 patients older than 55 years. Thus, we recommend emphasis to be given for monitoring of  
48 platelet count, PT, APTT and INR in hospitalized COVID-19 patients management.

49 ~~We found an abnormal pattern of coagulation parameters and association of advanced age and~~  
50 ~~co-morbidities with a high rate of mortality in severe COVID-19 patients, which should be taken~~  
51 ~~into consideration in their hospital management.~~

52 **Key words:** COVID-19, Prothrombin time, Activated partial thromboplastin time, international  
53 normalized ratio, Platelet, Addis Ababa, Ethiopia.

54

Formatted: Line spacing: Double

## 55 **Introduction**

56 Coronavirus disease 2019 (COVID-19) is caused by a novel beta corona\_virus\_called ~~as~~-severe  
57 acute respiratory syndrome coronavirus 2 (SARS-CoV-2)(1). COVID-19 has become a  
58 pandemic that has heavily affected the global population. As of November 8,2020,\_there have  
59 been 49,578,590 confirmed cases of COVID-19 and 1,245,717 deaths, reported to [World Health](#)  
60 [organization \(WHO\)](#). Similarly, there have been 99,204 confirmed cases of COVID-19 with  
61 1,518 deaths in Ethiopia(2).

62 The severity of COVID-19 varies considerably from asymptomatic to life threatening, lung  
63 injury being the main clinical manifestation. Most of the patients have a favorable prognosis, but  
64 some rapidly progress to severe and critical cases with respiratory distress syndrome, coagulation  
65 dysfunction and multiple organ failures(3, 4).\_Although\_the pathophysiology and the underlining  
66 mechanisms of clinical manifestations remain unclear,\_thrombo-inflammation and cytokine  
67 storm are clearly established components in Severe Acute Respiratory Distress Syndrome  
68 (SARS) of COVID-19(5-8).

69 Coagulopathy and abnormal coagulation ~~factors~~[profiles](#) were indicated among the most  
70 significant markers of poor prognosis in COVID-19 [patients](#) (9-11). A retrospective cohort study  
71 conducted in Spain Madrid showed COVID-19 non-survivors had significantly lower  
72 prothrombin activity, abnormal coagulation parameters like prolonged PT, APTT, higher D-  
73 dimer ~~and~~ higher fibrinogen levels compared to survivors indicating coagulation parameters  
74 could be an efficient measure for improving the clinical management and predicting the  
75 prognosis of patients with SARS COV-2(7).\_Similarly, Long et al has reported that occurrence of  
76 coagulation dysfunction is more likely in severe and critically ill patients. The study also showed  
77 that D-dimer and prothrombin\_time could be considered as ~~a~~-main indicators in predicting the

78 mortality of COVID-19 patients(3). Different studies also support that COVID-19 patients  
79 ~~infected by COVID-19~~ are at high risk of developing disseminated intravascular coagulation (12,  
80 13).

81 It is also indicated that comparison of ~~-~~reports from various populations related to the clinical  
82 course, outcome of COVID-19 and blood coagulation profile in these patients are necessary to  
83 help the management and treatment of the disease(12, 14). Moreover, this routine coagulation  
84 parameter tests could be used as potential indicators for COVID-19 in individuals having typical  
85 clinical manifestations that would be inputs for prompt patient management especially in  
86 resource limited settings where the high-tech gold standard RT-PCR is not widely available, like  
87 Ethiopia. However, data on coagulation profiles among Ethiopian COVID-19 patients is scarce.  
88 Thus, the aim of this study was to find out the coagulation profile of COVID-19 patients  
89 admitted at Millennium COVID-19 treatment center, Addis Ababa, Ethiopia.

## 90 ***Methods***

### 91 ***Study population***

92 In this study, we have included 455 consecutive patients with confirmed SARS-CoV-2 infection  
93 and admitted to Millennium COVID-19 treatment center, Addis Ababa, Ethiopia from July 1-  
94 October 23, 2020. The treatment center is the first referral center of COVID-19 patients in  
95 Ethiopia, since May 02, 2020. ~~Blood samples were collected by nurse professional in the~~  
96 ~~treatment center and transported to Millennium COVID-19 treatment center.~~ None of the study  
97 participants was taking anticoagulant ~~drugs~~ medications before blood drawing. Diagnosis of  
98 SARS-CoV-2 infection ~~COVID-19~~ was made according to real time PCR.

### 99 ***Sample collection and coagulation profile analysis***

100 **2.6. Laboratory Analysis**

101 Eight milliliters of venous blood ~~were~~was collected by professional nurses working in the  
102 treatment center: five milliliters in EDTA for platelet count, three milliliters in 3.2% sodium  
103 citrated anti-coagulated tube for analysis of coagulation parameters. The samples for coagulation  
104 tests were collected at hospital admission. The prothrombin time (PT), activated partial  
105 prothrombin time (APTT), and international normalized ratio (INR) were analyzed using  
106 **HUMACLOT DUE PLUS** coagulation analyzer (Wiesbaden, Germany). Platelet count was  
107 performed using Beckman coulter DxH 600 automated hematology analyzer. The coagulation  
108 parameters were compared with the manufacturer cut\_off normal range of  
109 PT = 11.7- 15 seconds, APTT = 23.8- 37.9 seconds, INR = 1.0- 1.2 and PLT= 159-386/ $\mu$ .l. The  
110 coagulation parameters above the cut\_off range were considered as a prolonged time and  
111 thrombocytopenia in the case of lower than cut\_off value for platelet. All laboratory tests and its  
112 interpretation were done following the manufacturers' recommendation and standard operating  
113 procedures.

114 **Ethical Consideration.** The study was approved by Addis Ababa University College of Hhealth  
115 Sciences, department of Mmedical Laboratory Sciences research ethics ~~and research~~review  
116 committee. Informed consent was taken from each of the study participants. Laboratory test  
117 results were communicated to the responsible clinicians working at the treatment center. All the  
118 information obtained from the study participants were kept confidential.

119 **Statistical Analysis**

120 Statistical Package for the Social Sciences (SPSS) ~~statistical~~ software ~~package~~ version 25.0  
121 (SPSS Inc., Chicago, IL, USA) was used for statistical analysis. Chi-square test was used to

Formatted: Highlight

122 determine association among categorical variables. The quantitative data were expressed as  
123 Mean  $\pm$  SD. P-value < 0.05 was considered as statistically significant.

124

## 125 **Results**

### 126 ***Socio-demographic and Clinical characteristics of Study participants***

127 In this study, 455 patients diagnosed with COVID-19 were included. Among the study  
128 participants, 289 (63.5%) were males. The study participants were between the age of 4 and 90  
129 years with a mean of  $49.9 \pm 18.3$  years. From the total 455 case, there were 297 mild cases, 90  
130 severe cases, and 68 critical cases based on disease severity of COVID-19. These cases were  
131 divided into three groups based on the disease severity and the rate of critical cases was  
132 15% (Table 1).

133 **Table 1:** Socio-demographic characteristics of study participants Addis Ababa, Ethiopia, 2020

| Variables |             | Frequency | Percent |
|-----------|-------------|-----------|---------|
| Gender    | Male        | 289       | 63.5%   |
|           | Female      | 166       | 36.5%   |
| Age group | 0-18 years  | 15        | 3.2%    |
|           | 18-35 years | 101       | 22.1%   |
|           | 36-55 years | 158       | 34.7%   |
|           | >55 years   | 181       | 39.7%   |

|                  |          |     |       |
|------------------|----------|-----|-------|
| Disease severity | Moderate | 297 | 65.2% |
|                  | Severe   | 90  | 19.8% |
|                  | Critical | 68  | 15%   |

134 The median time from the disease onset to admission was 4 days (2-8 days). Severe and critical  
135 groups showed ~~statistically significant~~ differences in sex ratio and age distribution. In severe and  
136 critical groups, majority were males and elderly (Table 2)<sup>†</sup>

137 **Table 2: Socio-demographic characteristics and disease severity of COVID-19 patients**  
138 **admitted to Millennium COVID-19 treatment center Addis Ababa, Ethiopia**

| Variables                 |                           | Disease Severity              |                                    |                               | P-value |
|---------------------------|---------------------------|-------------------------------|------------------------------------|-------------------------------|---------|
|                           |                           | Moderate <sub>2</sub><br>n(%) | Severe <sub>2</sub><br><u>n(%)</u> | Critical <sub>2</sub><br>n=68 |         |
| Age(year)                 | 0-18 <sub>2</sub> n= 15   | 10                            | 4                                  | 1                             | 0.283   |
|                           | 18-35 <sub>2</sub> n=101  | 65                            | 22                                 | 14                            |         |
|                           | 36-55 <sub>2</sub> n=158  | 107                           | 31                                 | 20                            |         |
|                           | >55 <sub>2</sub> n=181    | 115                           | 33                                 | 33                            |         |
| Sex <sub>2</sub><br>N=455 | Male <sub>2</sub> n=289   | 187                           | 56                                 | 46                            | 0.045   |
|                           | Female <sub>2</sub> n=166 | 110                           | 34                                 | 22                            |         |
|                           |                           |                               |                                    |                               |         |

139

140 **Magnitude of coagulation abnormalities**

141 In this study, 209 COVID-19 patients (46%) showed prolonged PT and higher INR values.  
 142 Among those patients with prolonged PT, 51.3% ~~are~~ were above -55 years of age. Prolonged PT  
 143 value was found among males (49.8%) than females (41%) and ~~prolonged PT~~ it has a significant  
 144 association with gender (P =value 0.045). Similarly, 51.4% and 53.3% of ICU (critical) and  
 145 severe patients had ~~a~~ prolonged PT values. Notably, prolonged APTT values were found among  
 146 ~~196/455~~ 43.1% of ~~-~~ individuals, and from these 47%, 45% and 41% were ~~the distribution~~  
 147 ICU (critical), ~~s~~ Severe and moderate patients, respectively. 57.2% of 95/166 female patients had  
 148 prolonged APTT; and 51.3% of patients aged older than 55 years had a prolonged APTT.  
 149 ~~Thrombocytopenia and abnormal coagulation parameters (PT, APTT and INR) could be~~  
 150 ~~considered as important indicators of COVID-19 disease severity.~~

151 Thrombocytopenia was detected in 22.1%(101 out of 455) ~~around 101/455 (22.1%) of~~  
 152 individuals. 50.5%(50 out of 99)/99 (50.5%) individual's ~~patients~~ aged older than 55 years had  
 153 thrombocytopenia. Thrombocytopenia was higher among male (23.8%) ~~ICU patients~~ than female  
 154 (18%) ICU patients.

Formatted: Space Before: 12 pt

155 **Table 3: Coagulation parameters in patients with severe COVID-19 according to different**  
 156 **variables**

| Coagulation Parameters |      | Variables    |                |                |              |               |                 |                   |                |                  |
|------------------------|------|--------------|----------------|----------------|--------------|---------------|-----------------|-------------------|----------------|------------------|
|                        |      | Age          |                |                |              | Sex           |                 | Disease Severity  |                |                  |
|                        |      | 0-18<br>n=15 | 19-35<br>n=101 | 36-55<br>n=158 | >55<br>n=181 | Male<br>n=289 | Female<br>n=166 | Moderate<br>n=297 | Severe<br>n=90 | Critical<br>n=68 |
| PT                     | High | 9            | 50             | 61             | 93           | 144           | 69              | 130               | 48             | 35               |



|      |        |   |    |     |     |     |     |     |    |    |
|------|--------|---|----|-----|-----|-----|-----|-----|----|----|
|      | Normal | 6 | 45 | 89  | 80  | 131 | 89  | 149 | 40 | 31 |
|      | Low    | 0 | 6  | 8   | 8   | 14  | 8   | 18  | 2  | 2  |
| APTT | High   | 6 | 46 | 68  | 76  | 101 | 95  | 115 | 41 | 42 |
|      | Normal | 6 | 38 | 70  | 79  | 136 | 57  | 137 | 36 | 21 |
|      | Low    | 3 | 17 | 20  | 26  | 52  | 14  | 45  | 13 | 5  |
| PLT  | High   | 4 | 11 | 24  | 26  | 43  | 22  | 39  | 8  | 8  |
|      | Normal | 9 | 70 | 107 | 105 | 177 | 114 | 130 | 44 | 31 |
|      | Low    | 2 | 20 | 27  | 50  | 69  | 30  | 128 | 38 | 29 |
| INR  | High   | 8 | 52 | 60  | 92  | 140 | 68  | 96  | 49 | 33 |
|      | Normal | 6 | 39 | 88  | 77  | 105 | 65  | 106 | 38 | 32 |
|      | Low    | 1 | 10 | 10  | 12  | 44  | 33  | 95  | 3  | 3  |

157

158 PLT=platelet; PT= prothrombin time; APTT=activated partial thromboplastin time;

159 INR=international normalized ratio.

160 **Discussion**

161 The COVID-19 pandemic has brought major impact on health care globally. ,which is caused by

162 SARS-CoV 2, has spread across the globe. Although most patients recover within 1 to 3 weeks,

163 COVID-19 has already caused >1.2 million deaths worldwide and more than 1400 in Ethiopia as

164 of October 30,2020 according to WHO report(15). Coagulation abnormalities are indicated as

165 frequent findings in COVID-19 patients and associated with poor prognosis and survival(7).  
166 Dysregulation of coagulation produces a coagulopathy associated with hyper coagulability (7)as  
167 evidenced by venous and arterial thrombosis and multi organ dysfunction. Up toSimilarly, it is  
168 also indicated that coagulopathy which is resulted due to dysregulation of coagulation and  
169 associated with hypercoagulability as evidenced by venous and arterial thrombosis and  
170 multiorgan dysfunction(16); is one of the most significant prognostic factors in patients with  
171 COVID-19 and is associated with increased hospitalization, admission to critical care, and  
172 mortality(14, 17-19) 20% of affected patients require hospitalization, and the mortality rate in  
173 such patients is high(18, 19). Coagulopathy is one of the most significant prognostic factors in  
174 patients with COVID-19 and is associated with increased mortality and admission to critical  
175 care(14, 17). Previous studies indicated that Most commonly observed coagulopathy in patients  
176 hospitalized with COVID-19 (COVID-19 associated coagulopathy) is characterized by increase  
177 in  $\downarrow$  coagulation parameters like such as PT, APTT and INR levels(20, 21),

Formatted: Pattern: Clear (White)

178 Patients with a serious infection are more likely to have COVID-19 associated coagulopathy than  
179 patients with a mild infection (21,22). In our study, prolonged PT, APTT an INR was found  
180 among sSevere and critical COVID-19 patients than moderate clinical manifestations ones. and  
181 Similarly, many studies also reported that thrombotic complications are common among  
182 COVID-19 patients admitted to the intensive care unit (ICU) for COVID-19 (reported in 9.5%-  
183 47%)(22-24).

184 As for all coagulopathies, Ttreatment of the underlying condition is suggested to be paramount in  
185 coagulopathies. It is shown that bleeding is not common clinical manifestation in. Experience to  
186 date suggests that COVID-19 infections infrequently leads to bleeding despite abnormal  
187 coagulation parameters (23,24). Along these, it is suggested that sSupportive care including

188 blood product transfusion should be individualized in COVID -19 patients(25, 26). ~~Blood~~  
189 ~~component therapy should not be instituted on the basis of Llaboratory results findings~~ alone  
190 ~~should not be taken as basis for instituting blood transfusion therapy, but rather it should be~~  
191 reserved for those who are bleeding, require an invasive procedure, or who are otherwise at high  
192 risk for bleeding complications(26, 27).

193 ~~Considerable Evidence indicate~~evidences indicates that COVID-19 is associated with a hyper-  
194 coagulable state. ~~Thus, despite anticoagulant thrombo prophylaxis, different studies have~~  
195 ~~reported that rates of Vvenous thromboembolism (VTE) and arterial thrombosis ranging from~~  
196 15% to 30% were found in critically ill patients with COVID-19 and ~about 7% in those  
197 admitted to medical wards(28-30). Clotting is reported from different medical devices used,  
198 deep vein thrombosis and multiple thrombi in the vessels of the lungs, kidneysand other organs  
199 from autopsy of patients died of Covid-19 Clotting of access catheters, dialysis membranes, and  
200 extracorporeal circuits has also been reported. Furthermore, in patients dying from COVID-19,  
201 autopsy studies reveal unsuspected deep vein thrombosis and multiple thrombi in the vessels of  
202 the lungs, kidneys, and other organs(9, 29). These ~~findings have prompted some~~  
203 cliniciansindicate clinicians to use ~~treatment therapeutic~~ doses of heparin or low-molecular-  
204 weight heparin instead of prophylactic doses in critically ill COVID-19 patients(12, 26, 31).

205 In ~~this the~~ current study, thrombocytopenia was observed among males\_(23.8%) than  
206 ~~malesfemales~~ (19.8%) and older peoples(27.6%). Severe\_(42.68%) and critical (42%) patients  
207 ~~had alsoalso had shown~~ thrombocytopenia and this was in line with studies conducted in  
208 different countries (20, 22, 32, 33). Thrombocytopenia, defined as platelet count less than  
209  $100 \times 10^9$  cells/per-L were independently associated with COVID-19 severity(34). Studies across  
210 suggested that routine coagulation tests can be considered as a significant marker to help

211 clinicians assess prognosis and severity of patients with COVID-19. In critically ill patients,  
212 thrombocytopenia correlates with multi-organ failure and death, and a decline in platelet count,  
213 even in the absence of overt thrombocytopenia, portends a worse outcome(9, 12, 13). In patients  
214 who are not bleeding, there is no evidence that correction of laboratory parameters with blood  
215 products improves outcomes. Replacement might worsen disseminated thrombosis and further  
216 deplete scarce blood products(28, 35).

217 ~~As M~~any studies reported that ~~the~~ coagulopathy associated with COVID-19 is characterized by  
218 thrombocytopenia, prolongation of the prothrombin time, high levels of D-dimer, and elevated  
219 levels of fibrinogen, factor VIII, and von Willebrand factor(3, 11, 16). The ~~levels of~~  
220 ~~coagulation~~degree of coagulation abnormalities correlate with disease severity and predict the  
221 risk of thrombosis, the need for ventilator support, and mortality. ~~Although the features of~~  
222 COVID-19-associated coagulopathy ~~have been considered~~ is however unique with a very  
223 decreased platelet count (9, 36-38). ~~However, in P~~patients with critical COVID-19 infection and  
224 a cytokine storm, have an an extreme hyper-coagulable state, ~~was reported~~. Even though the  
225 reason for this life-threatening condition is not known, ~~but~~ this might be due to an uncontrolled  
226 hyper-inflammatory response without previous immunity(39, 40).

227 **Conclusion:** In this study, prolonged prothrombin time and high INR were found among severe  
228 and critical COVID-19 patients. Thrombocytopenia and prolonged APTT were dominant in  
229 COVID-19 patients older than 55 years. Thus, We we recommend emphasis to be given for  
230 monitoring of platelet count, PT, APTT and INR in hospitalized COVID-19 patients  
231 management. Worsening of these parameters indicates progressive severity of COVID 19  
232 infection and predicts that more aggressive critical care will be needed; experimental therapies

233 ~~for COVID-19 infection might be considered in this setting. Improvement of~~  
234 ~~coagulation parameters along with improving clinical condition provides confidence that stepping~~  
235 ~~down of aggressive treatment may be appropriate.~~

Formatted: Pattern: Clear (White)

236 **Ethical Clearance:** Ethical clearance was obtained from Addis Ababa University, College of  
237 Health Science, Department of Medical Laboratory Sciences. Research ethics ~~ethical~~-review  
238 committee and it was in accordance with the principles of the Helsinki II declaration.

239 **Consent for publication:** Not applicable

#### 240 **Availability of data and material**

241 ~~The data sets used or analyzed during the current study are available from the corresponding~~  
242 ~~author on reasonable request.~~ All the available data were included in the manuscript.

243 **Funding:** None.

244 **Conflict of interest:** The authors declare that they have no conflict of interest.

#### 245 **References**

- 246 1. Sohrabi C, Alsafi Z, O'Neill N, Khan M, Kerwan A, Al-Jabir A, et al. World Health  
247 Organization declares global emergency: A review of the 2019 novel coronavirus (COVID-19).  
248 Int J Surg. 2020;76:71-6.
- 249 2. World Health Organization. Who coronavirus disease (covid-19) dashboard  
250 2020, November 8 [Available from: <https://covid19.who.int/info>.
- 251 3. Long H, Nie L, Xiang X, Li H, Zhang X, Fu X, et al. D-Dimer and Prothrombin Time  
252 Are the Significant Indicators of Severe COVID-19 and Poor Prognosis. BioMed research  
253 international. 2020;2020:6159720.
- 254 4. Guan WJ, Ni ZY, Hu Y, Liang WH, Ou CQ, He JX, et al. Clinical Characteristics of  
255 Coronavirus Disease 2019 in China. The New England journal of medicine. 2020;382(18):1708-  
256 20.
- 257 5. Aggarwal M, Dass J, Mahapatra M. Hemostatic Abnormalities in COVID-19: An  
258 Update. Indian J Hematol Blood Transfus. 2020:1-11.
- 259 6. Coccheri S. COVID-19: The crucial role of blood coagulation and fibrinolysis. Intern  
260 Emerg Med. 2020;15(8):1369-73.

- 261 7. Quintana-Díaz M, Andrés-Esteban EM, Ramírez-Cervantes KL, Olivan-Blázquez B,  
262 Juárez-Vela R, Gea-Caballero V. Coagulation Parameters: An Efficient Measure for Predicting  
263 the Prognosis and Clinical Management of Patients with COVID-19. *Journal of Clinical*  
264 *Medicine*. 2020;9(11).
- 265 8. Parasher A. COVID-19: Current understanding of its pathophysiology, clinical  
266 presentation and treatment. *Postgrad Med J*. 2020.
- 267 9. Al-Samkari H, Karp Leaf RS, Dzik WH, Carlson JCT, Fogerty AE, Waheed A, et al.  
268 COVID-19 and coagulation: bleeding and thrombotic manifestations of SARS-CoV-2 infection.  
269 *Blood*. 2020;136(4):489-500.
- 270 10. Annunziata A, Imitazione P, Polistina GE, Lanza M, Coppola A, Fiorentino G.  
271 Pulmonary Embolism in Covid-19: Coagulation Parameters, Close Monitoring to Prevent? *Turk*  
272 *Thorac J*. 2020;21(4):287-8.
- 273 11. Savioli F, Rocha LL. Coagulation profile in severe COVID-19 patients: what do we  
274 know so far? *Revista Brasileira de Terapia Intensiva*. 2020;32(2).
- 275 12. Buioni D, Nardi P, Ruvolo G. Thrombocytopenia and coagulation disorders due to  
276 COVID 19 infection with concomitant cardiovascular diseases requiring anti-platelet and  
277 anticoagulant therapy, which strategy? *Clin Chim Acta*. 2020;508:109.
- 278 13. Levi M. COVID-19 coagulopathy vs disseminated intravascular coagulation. *Blood Adv*.  
279 2020;4(12):2850.
- 280 14. Quintana-Díaz M, Andrés-Esteban EM, Ramírez-Cervantes KL, Olivan-Blázquez B,  
281 Juárez-Vela R, Gea-Caballero V. Coagulation Parameters: An Efficient Measure for Predicting  
282 the Prognosis and Clinical Management of Patients with COVID-19. *J Clin Med*. 2020;9(11).
- 283 15. WHO. COVID19. 2020. Contract No.:
- 284 .
- 285 16. Chan NC, Weitz JI. COVID-19 coagulopathy, thrombosis, and bleeding. *Blood*.  
286 2020;41:100648.
- 287 17. Rauch A, Labreuche J, Lassalle F, Goutay J, Caplan M, Charbonnier L, et al. Coagulation  
288 biomarkers are independent predictors of increased oxygen requirements in COVID-19. *J*  
289 *Thromb Haemost*. 2020.
- 290 18. Zhang Y, He L, Chen H, Lu S, Xiong Y, Liu J, et al. Manifestations of blood coagulation  
291 and its relation to clinical outcomes in severe COVID-19 patients: Retrospective analysis. *Int J*  
292 *Lab Hematol*. 2020.
- 293 19. Zhang A, Leng Y, Zhang Y, Wu K, Ji Y, Lei S, et al. Meta-analysis of coagulation  
294 parameters associated with disease severity and poor prognosis of COVID-19. *International*  
295 *journal of infectious diseases : IJID : official publication of the International Society for*  
296 *Infectious Diseases*. 2020;100:441-8.
- 297 20. Luo HC, You CY, Lu SW, Fu YQ. Characteristics of coagulation alteration in patients  
298 with COVID-19. *Ann Hematol*. 2020.
- 299 21. Levi M, Thachil J, Iba T, Levy JH. Coagulation abnormalities and thrombosis in patients  
300 with COVID-19. *Lancet Haematol*. 2020;7(6):e438-e40.
- 301 22. Zou Y, Guo H, Zhang Y, Zhang Z, Liu Y, Wang J, et al. Analysis of coagulation  
302 parameters in patients with COVID-19 in Shanghai, China. *Biosci Trends*. 2020;14(4):285-9.
- 303 23. Sayad B, Rahimi Z. Blood coagulation parameters in patients with severe COVID-19  
304 from Kermanshah Province, Islamic Republic of Iran. *East Mediterr Health J*. 2020;26(9):999-  
305 1004.

- 306 24. Adam EH, Zacharowski K, Miesbach W. A comprehensive assessment of the coagulation  
307 profile in critically ill COVID-19 patients. *Thromb Res.* 2020;194:42-4.
- 308 25. Paar V, Wernly B, Zhou Z, Motloch LJ, Hoppe UC, Egle A, et al. Anti-coagulation for  
309 COVID-19 treatment: both anti-thrombotic and anti-inflammatory? *J Thromb Thrombolysis.*  
310 2020.
- 311 26. Belen-Apak FB, Sarialioglu F. Pulmonary intravascular coagulation in COVID-19:  
312 possible pathogenesis and recommendations on anticoagulant/thrombolytic therapy. *J Thromb*  
313 *Thrombolysis.* 2020;50(2):278-80.
- 314 27. Lee AY, Connors JM, Kreuziger LB, Murphy M, Gernsheimer T, Lin Y, et al. COVID-  
315 19 and Coagulopathy 2020, December 1 [Available from: [https://www.hematology.org/COVID-](https://www.hematology.org/COVID-19/COVID-19-and-coagulopathy)  
316 [19/COVID-19-and-coagulopathy](https://www.hematology.org/COVID-19/COVID-19-and-coagulopathy)].
- 317 28. Harenberg J, Favaloro E. COVID-19: progression of disease and intravascular  
318 coagulation - present status and future perspectives. *Clin Chem Lab Med.* 2020;58(7):1029-36.
- 319 29. Pizzi R, Gini G, Caiano L, Castelli B, Dotan N, Magni F, et al. Coagulation parameters  
320 and venous thromboembolism in patients with and without COVID-19 admitted to the  
321 Emergency Department for acute respiratory insufficiency. *Thromb Res.* 2020;196:209-12.
- 322 30. Voicu S, Delrue M, Chousterman BG, Stepanian A, Bonnin P, Malissin I, et al.  
323 Imbalance between procoagulant factors and natural coagulation inhibitors contributes to  
324 hypercoagulability in the critically ill COVID-19 patient: clinical implications. *Eur Rev Med*  
325 *Pharmacol Sci.* 2020;24(17):9161-8.
- 326 31. Mei H, Hu Y. [Characteristics, causes, diagnosis and treatment of coagulation  
327 dysfunction in patients with COVID-19]. *Zhonghua Xue Ye Xue Za Zhi.* 2020;41(3):185-91.
- 328 32. Bao C, Tao X, Cui W, Yi B, Pan T, Young KH, et al. SARS-CoV-2 induced  
329 thrombocytopenia as an important biomarker significantly correlated with abnormal coagulation  
330 function, increased intravascular blood clot risk and mortality in COVID-19 patients. *Exp*  
331 *Hematol Oncol.* 2020;9:16.
- 332 33. Xiong M, Liang X, Wei YD. Changes in blood coagulation in patients with severe  
333 coronavirus disease 2019 (COVID-19): a meta-analysis. *Br J Haematol.* 2020;189(6):1050-2.
- 334 34. Kander T. Coagulation disorder in COVID-19. *The Lancet Haematology.*  
335 2020;7(9):e630-e2.
- 336 35. Song JC, Wang G, Zhang W, Zhang Y, Li WQ, Zhou Z, et al. Chinese expert consensus  
337 on diagnosis and treatment of coagulation dysfunction in COVID-19. *Mil Med Res.*  
338 2020;7(1):19.
- 339 36. Chen X, Wang Q, Xu M, Li C. A Retrospective Analysis of the Coagulation Dysfunction  
340 in COVID-19 Patients. *Clin Appl Thromb Hemost.* 2020;26:1076029620964868.
- 341 37. Pavoni V, Ganesello L, Pazzi M, Stera C, Meconi T, Frigieri FC. Evaluation of  
342 coagulation function by rotation thromboelastometry in critically ill patients with severe  
343 COVID-19 pneumonia. *J Thromb Thrombolysis.* 2020;50(2):281-6.
- 344 38. Savioli F, Rocha LL. Coagulation profile in severe COVID-19 patients: what do we  
345 know so far? *Rev Bras Ter Intensiva.* 2020;32(2):197-9.
- 346 39. Jose RJ, Manuel A. COVID-19 cytokine storm: the interplay between inflammation and  
347 coagulation. *Lancet Respir Med.* 2020;8(6):e46-e7.
- 348 40. Kasinathan G, Sathar J. Haematological manifestations, mechanisms of thrombosis and  
349 anti-coagulation in COVID-19 disease: A review. *Ann Med Surg (Lond).* 2020;56:173-7.
