# Supplementary material for: Blood coagulation parameter abnormalities in hospitalized patients with confirmed COVID-19 in Ethiopia
Source: PubMed Central journal article supplement (PMC8216564; doi:10.1371/journal.pone.0252939), 2021-06-21
Supplement: pone.0252939.s003.pdf [file pone.0252939.s003.pdf]

# PLOS ONE

## Blood coagulation parameter abnormalities in hospitalized patients with confirmed COVID-19 in Ethiopia --Manuscript Draft--

|                               |                                                                                                                                                                                                                                                                                                                                                                                                                                                                                                                                                                                                                                                                                                                                                                                                                                                                                                                                                                                                                                                                                                                                                                                                                                                                                                                                                                                                                                                                                                                                                                                                                                                                                                                                                                                                   |
|-------------------------------|---------------------------------------------------------------------------------------------------------------------------------------------------------------------------------------------------------------------------------------------------------------------------------------------------------------------------------------------------------------------------------------------------------------------------------------------------------------------------------------------------------------------------------------------------------------------------------------------------------------------------------------------------------------------------------------------------------------------------------------------------------------------------------------------------------------------------------------------------------------------------------------------------------------------------------------------------------------------------------------------------------------------------------------------------------------------------------------------------------------------------------------------------------------------------------------------------------------------------------------------------------------------------------------------------------------------------------------------------------------------------------------------------------------------------------------------------------------------------------------------------------------------------------------------------------------------------------------------------------------------------------------------------------------------------------------------------------------------------------------------------------------------------------------------------|
| <b>Manuscript Number:</b>     | PONE-D-20-35898R2                                                                                                                                                                                                                                                                                                                                                                                                                                                                                                                                                                                                                                                                                                                                                                                                                                                                                                                                                                                                                                                                                                                                                                                                                                                                                                                                                                                                                                                                                                                                                                                                                                                                                                                                                                                 |
| <b>Article Type:</b>          | Research Article                                                                                                                                                                                                                                                                                                                                                                                                                                                                                                                                                                                                                                                                                                                                                                                                                                                                                                                                                                                                                                                                                                                                                                                                                                                                                                                                                                                                                                                                                                                                                                                                                                                                                                                                                                                  |
| <b>Full Title:</b>            | Blood coagulation parameter abnormalities in hospitalized patients with confirmed COVID-19 in Ethiopia                                                                                                                                                                                                                                                                                                                                                                                                                                                                                                                                                                                                                                                                                                                                                                                                                                                                                                                                                                                                                                                                                                                                                                                                                                                                                                                                                                                                                                                                                                                                                                                                                                                                                            |
| <b>Short Title:</b>           | Coagulation profile of COVID-19 patients                                                                                                                                                                                                                                                                                                                                                                                                                                                                                                                                                                                                                                                                                                                                                                                                                                                                                                                                                                                                                                                                                                                                                                                                                                                                                                                                                                                                                                                                                                                                                                                                                                                                                                                                                          |
| <b>Corresponding Author:</b>  | Shambel Araya<br>Addis Ababa University<br>Addis Ababa, ETHIOPIA                                                                                                                                                                                                                                                                                                                                                                                                                                                                                                                                                                                                                                                                                                                                                                                                                                                                                                                                                                                                                                                                                                                                                                                                                                                                                                                                                                                                                                                                                                                                                                                                                                                                                                                                  |
| <b>Keywords:</b>              | COVID-19; Prothrombin time; activated partial thromboplastin time; international normalized ratio; platelet; Addis Ababa; Ethiopia                                                                                                                                                                                                                                                                                                                                                                                                                                                                                                                                                                                                                                                                                                                                                                                                                                                                                                                                                                                                                                                                                                                                                                                                                                                                                                                                                                                                                                                                                                                                                                                                                                                                |
| <b>Abstract:</b>              | <p>Background : Coagulopathy and thromboembolic events are among the complications of Corona Virus disease 2019 (COVID-19). <del>Thus,</del> abnormal coagulation profiles in COVID-19 patients are <del>taken as</del> important prognostic factors of <del>COVID-19</del> disease severity. The aim of this study was to analyze coagulation profiles of hospitalized COVID-19 patients in Addis Ababa, Ethiopia. Methods : This cross-sectional study was conducted among 455 Covid-19 patients admitted at Millennium COVID-19 treatment center, Addis Ababa, Ethiopia from July 1- October 23, 2020. Prothrombin Time (PT), Activated Partial Thromboplastin Time (APTT) and International normalized ratio (INR) were determined on HUMACLOT DUE PLUS  agulation analyzer (Wiesbaden, Germany) . In all <del>tests,</del> <math>p &lt; 0.05</math> was defined as statistically significant. Result : A prolonged prothrombin time was found in 46.8% of study subjects with COVID-19 and a prolonged prothrombin time and elevated INR <del>with</del> 53.3% of study subjects with severe and 51 % of critically COVID patients. Thrombocytopenia was detected in 22.1% of COVID-19 patients. 50.5% and 51.3% of COVID-19 patients older than 55 years had thrombocytopenia and prolonged APTT respectively. Conclusion :</p> <p>In this study, prolonged prothrombin time and high INR were detected in <del>around</del> 50% of severe and critical COVID-19 patients. Thrombocytopenia and prolonged APTT were dominant in COVID-19 patients older than 55 years. Thus, we recommend emphasis to be given for monitoring of platelet count, PT, APTT and INR in hospitalized COVID-19 patients.</p> |
| <b>Order of Authors:</b>      | Shambel Araya, MSc<br>Mintesnot Aragaw Mamo<br>Yakob Gebregziabher Tsegay<br>Aschalew Ayteneu<br>Abebe Hordofa<br>AbebeEdao Negeso<br>Zemenu Tamir<br>Tirhas Niguse<br>Mahlet Cheru<br>Asegdew Atlaw<br>Moges Wordofa                                                                                                                                                                                                                                                                                                                                                                                                                                                                                                                                                                                                                                                                                                                                                                                                                                                                                                                                                                                                                                                                                                                                                                                                                                                                                                                                                                                                                                                                                                                                                                             |
| <b>Response to Reviewers:</b> | Cover letter<br>Shambel Araya<br>Addis Ababa University<br>Addis Ababa, Ethiopia                                                                                                                                                                                                                                                                                                                                                                                                                                                                                                                                                                                                                                                                                                                                                                                                                                                                                                                                                                                                                                                                                                                                                                                                                                                                                                                                                                                                                                                                                                                                                                                                                                                                                                                  |

Email: shambelaraya8@gmail.com

Date: April, 2021

To: PLOS ONE Journal

Dear Editorial:

We are glad to write this response that our research article entitled "Blood coagulation parameter abnormalities among patients with confirmed COVID-19 in Ethiopia" (Submission ID: PONE-D-20-35898R1) has been requested to review for publication in PLOS ONE journal. We are pleased to have an opportunity to make our paper revised and we have greatly appreciated the reviewers' and editor's comments and suggestions were very helpful overall. In revising the paper, we have carefully considered reviewers' and editor's comments and suggestions on our revised submission. As instructed, we have attempted to succinctly explain changes made in reaction to all comments and reply to each comment in point-by-point fashion as follows:

Response to comments and suggestions inserted in the PDF format of the Manuscript

Comment 1: Abstract, methods section: "...Estimated by..." was replaced by "...determined on..." as per your suggestion in line 34

Comment 2: Abstract, Result section: "among" is replaced with 'in' in line 36

Comment 3: Abstract, Result section: "...Prolonged prothrombin time and high INR were seen among 53.3% severe and 51% critical 38 patients with COVID-19 manifestation.... Thrombocytopenia was detected in 22.1% of COVID-19 39 patients" has replaced with... and a prolonged prothrombin time and elevated INR with 53.3% of study subjects with severe and 51 % of critically COVID patients..." in line 37-39

Comment 4: abstract, conclusion section. In this study, prolonged prothrombin time and high INR were found among severe and critical COVID-19 patients.

Revised: In this study, prolonged prothrombin time and high INR were detected in 50% of severe and critical COVID-19 patients

Comment: abstract, conclusion section. Delete management

Response: Accepted and deleted in line 45

Comment 6: Introduction section. Replace showed with demonstrated that

Response: Accepted and replaced

Comment 7: ...Introduction section. coagulation parameters could be an efficient measure for improving the clinical management and predicting the prognosis of patients with SARS COV-2(7)...

Revised: ...coagulation parameters could be an efficient measure for predicting the prognosis of patients with SARS COV-2(7) and guiding management...

Comment 8: Introduction section: Accepted and modified as follow

"Different studies also support that COVID-19 patients are at high risk of developing disseminated intravascular coagulation (12, 13). It is also indicated that comparison of reports from various populations related to the clinical course, outcome of COVID-19 and blood coagulation profile in these patients are necessary to help the management and treatment of the disease (12, 14). Moreover, this routine coagulation parameter tests could be used as potential indicators for COVID-19 in individuals having typical clinical manifestations that would be inputs for prompt patient management especially in resource limited settings where the high-tech gold standard RT-PCR is not widely available, like Ethiopia"

Revised: Several studies have also demonstrated the increased occurrence of intravascular disseminated coagulopathy (DIC) in patients with COVID-19 (12, 13). The result of blood coagulation parameters in COVID-19 can also guide management decisions and improve outcomes (12, 14).

Moreover, routine coagulation parameter tests results could potentially be utilized in symptomatic patients in resource limited settings with inadequate access to COVID-19 RT-PCR, as in Ethiopia, to raise suspension of this infection. However, data on coagulation profiles among Ethiopian COVID-19 patients is not readily available, like

Ethiopia.

Comment8: Introduction section Replace "...find out..." with "...Determine..."

Response: accepted and replaced as per your suggestion

Comment 9: Delete "and" in line 88

Line 92: Replace "...of..." with "...for..."

Line 94: Replace "...Was taking..." with "...were receiving..."

Line 95: Change "According to" in to "...with..."

Response: Accepted and modified accordingly

Comment 10: Methods, laboratory section.

Eight milliliters of venous blood were collected by professional nurses working in the treatment center: five milliliters in EDTA for platelet count, three milliliters in 3.2% sodium citrated

Revised: Venous bloods were collected by professional nurses working in the treatment center: 5 mL in EDTA and 3 mL in 3.2% sodium citrated

Comment 11: Insert trade mark for each instruments and software's

Response: accepted and inserted as follow in line 99-102

Comment12: remove Addis Ababa, Ethiopia, 2020 from table 1

Response: Deleted as per your suggestion

Comment 13: Result section line 120-122 "Severe and critical groups showed differences in sex ratio and age distribution. In severe and critical groups, majority were males and elderly (Table 2)."

Revised: Severe and critical groups showed differences in sex ratio and age distribution. In severe (36.6%) and critical groups (48.5%), were elderly males of the age of >55 years old. y (Table 2).

Comment 14: result section table 3: remove "...admitted to Millennium COVID-19 treatment center Addis Ababa, Ethiopia..."

Response: accepted and removed table heading

Comment 15: Result section line 127-129, rewrite "Prolonged PT value was found among males (49.8%) than females (41%) and it has a significant association with gender (P = 0.045)."

Revised: accepted and modified as "Prolonged PT values were demonstrated more frequently among males (49.8%) than females (41%) and this difference was significantly different (P = 0.045)."

Comment 16: replace study subjects with individuals

Response accepted and replaced in line 130

Comment 16 result section line 135-136: rearrange "...patients aged older than 55 years had thrombocytopenia. Thrombocytopenia was higher among..." in to

Revised: modified as "...patients aged older than 55 years had thrombocytopenia and the occurrence was higher among..."

Comment 17: insert "...Result of ..." in table 3 heading

Response: accepted and modified as follow "Result of coagulation parameters in patients with severe COVID-19 according to different variables"

Comment 18: Discussion section: Replace "...had brought..." with "...had a..."

Delete indicated as

Remove findings

Comment 19: Rearrange the paragraph as below for "Coagulation abnormalities are indicated as frequent findings in COVID-19 patients and associated with poor prognosis and survival(7). Similarly, it is also indicated that coagulopathy which is resulted due to dysregulation of coagulation and associated with hypercoagulability as evidenced by venous and arterial thrombosis and multiorgan dysfunction (16); is one of the most significant prognostic factors in patients with COVID-19 and is associated with increased hospitalization, admission to critical care, and mortality"

Response: accepted

Revised: Coagulation abnormalities are frequent in COVID-19 patients and are associated with poor prognosis and reduced survival(7). Dysregulation of coagulation and associated with hypercoagulability in patients with COVID manifest as venous and arterial thrombosis and multiorgan dysfunction (16); which are poor prognostic markers resulting in increased mortality and hospitalization and ICU admission

Comment 20: discussion section

Line 151: remove "...levels..."

Line 153 insert "...more frequent..."

Line 153: remove "...than moderate ones..."

Line 159: replace "... alongside these, it is suggested that..." with "and"

Line 164: replace "...Evidence..." with "...published studies..."

Response: Accepted and modified as per your suggestion  
 Line 167: replace "...clotting is reported from..." with "...Abnormal thrombosis of..."  
 Line 167-170: rewrite it as follow for "...Clotting is reported from different medical devices used, deep vein thrombosis and multiple thrombi in the vessels of the lungs, kidneys and other organs from autopsy of patients died of Covid-19 (9, 29). These indicate clinicians to use..."  
 Response: Accepted and rephrase as follow  
 Revised: "...Abnormal thrombosis of different medical devices, deep vein thrombosis and multiple thrombi in the vessels of the lungs, kidneys and other organs at autopsy of patients who died of Covid-19 have been reported serving as the impetus behind guidelines (9, 29) which support the use..."  
 Line 173-175: rewrite it as follow for "Studies across suggested that routine coagulation tests can be considered as a significant marker to help clinicians assess prognosis and severity of patients with COVID-19..."  
 Response: Accepted and rephrase as follow  
 Revised: (34). "...Studies suggest that routine coagulation test results are markers of disease severity and assist in management decision..."  
 Line 184: Insert "... in critically ill non-COVID patients..."  
 Response: accepted  
 Line 186-189: rephrase the sentence "COVID-19-associated coagulopathy is however unique with a much-decreased platelet count (9, 36-38)"  
 Revised: Published studies support that COVID-19-associated coagulopathy is characterized by a decreased platelet count (9, 36-38).  
 Dear all, we are very grateful for your valuable comments and for your time  
 Looking forward to hearing from you. Thank you again for your consideration!  
 Sincerely,  
 Shambel Araya (BSc, MSc, PhD fellow)

**Additional Information:**

| Question | Response |
|----------|----------|
|----------|----------|

|                                                                                                                                                                                                                                                                                                                                                                                                                                                                                                     |                                                                  |
|-----------------------------------------------------------------------------------------------------------------------------------------------------------------------------------------------------------------------------------------------------------------------------------------------------------------------------------------------------------------------------------------------------------------------------------------------------------------------------------------------------|------------------------------------------------------------------|
| <p><b>Financial Disclosure</b></p> <p>Enter a financial disclosure statement that describes the sources of funding for the work included in this submission. Review the <a href="#">submission guidelines</a> for detailed requirements. View published research articles from <a href="#">PLOS ONE</a> for specific examples.</p> <p>This statement is required for submission and <b>will appear in the published article</b> if the submission is accepted. Please make sure it is accurate.</p> | <p>The author(s) received no specific funding for this work.</p> |
|-----------------------------------------------------------------------------------------------------------------------------------------------------------------------------------------------------------------------------------------------------------------------------------------------------------------------------------------------------------------------------------------------------------------------------------------------------------------------------------------------------|------------------------------------------------------------------|

**Unfunded studies**

Enter: *The author(s) received no specific funding for this work.*

**Funded studies**

Enter a statement with the following details:

- Initials of the authors who received each award
- Grant numbers awarded to each author
- The full name of each funder
- URL of each funder website
- Did the sponsors or funders play any role in the study design, data collection and analysis, decision to publish, or preparation of the manuscript?
- **NO** - Include this sentence at the end of your statement: *The funders had no role in study design, data collection and analysis, decision to publish, or preparation of the manuscript.*
- **YES** - Specify the role(s) played.

\* typeset

**Competing Interests**

Use the instructions below to enter a competing interest statement for this submission. On behalf of all authors, disclose any [competing interests](#) that could be perceived to bias this work—acknowledging all financial support and any other relevant financial or non-financial competing interests.

This statement **will appear in the published article** if the submission is accepted. Please make sure it is accurate. View published research articles from [PLOS ONE](#) for specific examples.

The authors have declared that no competing interests exist

**NO authors have competing interests**

Enter: *The authors have declared that no competing interests exist.*

**Authors with competing interests**

Enter competing interest details beginning with this statement:

*I have read the journal's policy and the authors of this manuscript have the following competing interests: [insert competing interests here]*

\* typeset

**Ethics Statement**

Enter an ethics statement for this submission. This statement is required if the study involved:

- Human participants
- Human specimens or tissue
- Vertebrate animals or cephalopods
- Vertebrate embryos or tissues
- Field research

Write "N/A" if the submission does not require an ethics statement.

General guidance is provided below. Consult the [submission guidelines](#) for detailed instructions. **Make sure that all information entered here is included in the Methods section of the manuscript.**

Addis Ababa University College of Health Science Department of Medical Laboratory Science research ethics review committee (DRERC) protocol number: DRERC/538/20/MLS

**Format for specific study types**

**Human Subject Research (involving human participants and/or tissue)**

- Give the name of the institutional review board or ethics committee that approved the study
- Include the approval number and/or a statement indicating approval of this research
- Indicate the form of consent obtained (written/oral) or the reason that consent was not obtained (e.g. the data were analyzed anonymously)

**Animal Research (involving vertebrate animals, embryos or tissues)**

- Provide the name of the Institutional Animal Care and Use Committee (IACUC) or other relevant ethics board that reviewed the study protocol, and indicate whether they approved this research or granted a formal waiver of ethical approval
- Include an approval number if one was obtained
- If the study involved *non-human primates*, add *additional details* about animal welfare and steps taken to ameliorate suffering
- If anesthesia, euthanasia, or any kind of animal sacrifice is part of the study, include briefly which substances and/or methods were applied

**Field Research**

Include the following details if this study involves the collection of plant, animal, or other materials from a natural setting:

- Field permit number
- Name of the institution or relevant body that granted permission

**Data Availability**

Authors are required to make all data underlying the findings described fully available, without restriction, and from the time of publication. PLOS allows rare exceptions to address legal and ethical concerns. See the [PLOS Data Policy](#) and [FAQ](#) for detailed information.

Yes - all data are fully available without restriction

A Data Availability Statement describing where the data can be found is required at submission. Your answers to this question constitute the Data Availability Statement and **will be published in the article**, if accepted.

**Important:** Stating 'data available on request from the author' is not sufficient. If your data are only available upon request, select 'No' for the first question and explain your exceptional situation in the text box.

Do the authors confirm that all data underlying the findings described in their manuscript are fully available without restriction?

**Describe where the data may be found in full sentences. If you are copying our sample text, replace any instances of XXX with the appropriate details.**

- If the data are **held or will be held in a public repository**, include URLs, accession numbers or DOIs. If this information will only be available after acceptance, indicate this by ticking the box below. For example: *All XXX files are available from the XXX database (accession number(s) XXX, XXX).*
- If the data are all contained **within the manuscript and/or Supporting Information files**, enter the following: *All relevant data are within the manuscript and its Supporting Information files.*
- If neither of these applies but you are able to provide **details of access elsewhere**, with or without limitations, please do so. For example:

*Data cannot be shared publicly because of [XXX]. Data are available from the XXX Institutional Data Access / Ethics Committee (contact via XXX) for researchers who meet the criteria for access to confidential data.*

*The data underlying the results presented in the study are available from (include the name of the third party*

All relevant data are within the manuscript



|                                                                                                                                                                                                                                         |  |
|-----------------------------------------------------------------------------------------------------------------------------------------------------------------------------------------------------------------------------------------|--|
| <p><i>and contact information or URL).</i></p> <ul style="list-style-type: none"><li>• This text is appropriate if the data are owned by a third party and authors do not have permission to share the data.</li></ul> <p>* typeset</p> |  |
| Additional data availability information:                                                                                                                                                                                               |  |

1 ***Blood coagulation parameter abnormalities in hospitalized patients with confirmed COVID-19***  
2 ***in Ethiopia***

3 Shambel Araya<sup>1&2\*</sup>, Mintesnot Aragaw Mamo<sup>1&2</sup>, Yakob Gebregziabher Tsegay<sup>3&4</sup>, Asegdew Atlaw<sup>2</sup>,  
4 Aschalew Ayteneu<sup>2</sup>, Abebe Hordofa<sup>2</sup>, Abebe Edao Negeso<sup>1</sup>, Moges Wordofa<sup>1</sup>, Tirhas Niguse<sup>1</sup>, Mahlet  
5 Cheru<sup>1</sup>, Zemenu Tamir<sup>1</sup>

6 <sup>1</sup>Department of Medical Laboratory Sciences, College of Health Sciences, Addis Ababa  
7 University, Addis Ababa, Ethiopia

8 <sup>2</sup>Department of Medical Laboratory, Millennium COVID-19 Treatment and Care Centre,  
9 St. Paul Millennium Medical College, Addis Ababa, Ethiopia;

10 <sup>3</sup>Department of Medical Biotechnology, Institute of Biotechnology, University of  
11 Gondar, Gondar, Ethiopia.

12 <sup>4</sup>Department of Research and development center, College of Health Sciences, Defense  
13 University, Addis Ababa, Ethiopia.

14 Address:

15 1. Shambel Araya (corresponding author); [shambelaraya8@gmail.com](mailto:shambelaraya8@gmail.com)

16 2. Mintesnot Aragaw Mamo: [mintsh2015@gmail.com](mailto:mintsh2015@gmail.com)

17 3. Yakob Gebregziabher Tsegay: [yakobtsegay17@gmail.com](mailto:yakobtsegay17@gmail.com)

18 4. Asegdew Atlaw: [asegdew21@gmail.com](mailto:asegdew21@gmail.com)

19 5. Aschalew Ayteneu: [aschu9033@gmail.com](mailto:aschu9033@gmail.com)

20 6. Abebe Hordofa: [abuhordofa@gmail.com](mailto:abuhordofa@gmail.com)

21 7. Abebe Edao Negeso: [abenegesso@gmail.com](mailto:abenegesso@gmail.com)

22 8. Moges Wordofa: [heranmakmow@gmail.com](mailto:heranmakmow@gmail.com)

23 9. Tirhas Niguse: [peace.for.all.060610@gmail.com](mailto:peace.for.all.060610@gmail.com)

24 10. Mahlet Cheru: [yuluyaya54@gmail.com](mailto:yuluyaya54@gmail.com)

25 11. Zemenu Tamir: [zemenut266@gmail.com](mailto:zemenut266@gmail.com)

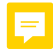

## 26 Abstract

27 **Background:** Coagulopathy and thromboembolic events are among the complications of Corona  
28 Virus disease 2019 (COVID-19). Thus, abnormal coagulation profiles in COVID-19 patients are  
29 taken as important prognostic factors of COVID-19 disease severity. The aim of this study was  
30 to analyze coagulation profiles of hospitalized COVID-19 patients in Addis Ababa, Ethiopia.

31 **Methods:** This cross-sectional study was conducted among 455 Covid-19 patients admitted at  
32 Millennium COVID-19 treatment center, Addis Ababa, Ethiopia from July 1- October 23, 2020.  
33 Prothrombin Time (PT), Activated Partial Thromboplastin Time (APTT) and International  
34 normalized ratio (INR) were determined on HUMACLOT DUE PLUS coagulation analyzer  
35 (Wiesbaden, Germany). In all tests,  $p < 0.05$  was defined as statistically significant.

36 **Result:** A prolonged prothrombin time was found in 46.8% of study subjects with COVID-19  
37 and a prolonged prothrombin time and elevated INR with 53.3% of study subjects with severe  
38 and 51 % of critically COVID patients. Thrombocytopenia was detected in 22.1% of COVID-19  
39 patients. 50.5% and 51.3% of COVID-19 patients older than 55 years had thrombocytopenia and  
40 prolonged APTT respectively.

### 41 **Conclusion:**

42 In this study, prolonged prothrombin time and high INR were detected in around 50% of severe  
43 and critical COVID-19 patients. Thrombocytopenia and prolonged APTT were dominant in  
44 COVID-19 patients older than 55 years. Thus, we recommend emphasis to be given for  
45 monitoring of platelet count, PT, APTT and INR in hospitalized COVID-19 patients.

46 **Key words:** COVID-19, Prothrombin time, activated partial thromboplastin time, international  
47 normalized ratio, Platelet, Addis Ababa, Ethiopia.

## 49 **Introduction**

50 Coronavirus disease 2019 (COVID-19) is caused by a novel beta corona virus called severe acute  
51 respiratory syndrome coronavirus 2 (SARS-CoV-2)(1). COVID-19 has become a pandemic that  
52 has ~~heavily~~ affected the global population. As of November 8, 2020, there have been ~~49,578,590~~  
53 confirmed cases of COVID-19 and ~~1,245,717~~ deaths, reported to World Health organization  
54 (WHO). Similarly, there have been 99,204 confirmed cases of COVID-19 with 1,518 deaths in  
55 Ethiopia(2).

56 The severity of COVID-19 varies considerably from asymptomatic to life threatening, lung   
57 injury being the main clinical manifestation. Most of the patients have a favorable prognosis, but  
58 some rapidly progress to severe ~~and critical cases with~~ respiratory distress syndrome, coagulation  
59 dysfunction and multiple organ failures (3, 4). Although the pathophysiology and the underlining  
60 mechanisms of clinical manifestations remain unclear, thrombo-inflammation and cytokine  
61 storm are clearly established components in Severe Acute Respiratory Distress Syndrome  
62 (SARS) of COVID-19(5-8).

63 Coagulopathy and abnormal coagulation profiles were indicated among the most significant  
64 markers of poor prognosis in COVID-19 patients (9-11). A retrospective cohort study conducted  
65 in Spain Madrid demonstrated that COVID-19 non-survivors had significantly lower  
66 prothrombin activity, abnormal coagulation parameters like prolonged PT, APTT, higher D-  
67 dimer and higher fibrinogen levels compared to survivors indicating coagulation parameters  
68 could be an efficient measure for predicting the prognosis of patients with SARS COV-2(7) and  
69 guiding management. Similarly, Long et al has reported that occurrence of coagulation  
70 dysfunction is more likely in severe and critically ill patients. The study also showed that D-  
71 dimer and prothrombin time could be considered as main indicators in predicting the mortality of

72 COVID-19 patients (3). Several studies have also demonstrated the increased occurrence of  
73 intravascular disseminated coagulopathy (DIC) in patients with COVID-19 (12, 13). The result  
74 of blood coagulation parameters in COVID-19 can also guide management decisions and  
75 improve outcomes (12, 14).

76 Moreover, routine coagulation parameter tests results could potentially be utilized in  
77 symptomatic patients in resource limited settings with inadequate access to COVID-19 RT-PCR,  
78 as in Ethiopia, to raise suspension of this infection. However, data on coagulation profiles among  
79 Ethiopian COVID-19 patients is not readily available. Thus, the aim of this study was to  
80 determinethe coagulation profile of COVID-19 patients admitted at Millennium COVID-19  
81 treatment center, Addis Ababa, Ethiopia.

## 82 ***Methods***

83 ***Ethical consideration:*** The study was approved by Addis Ababa University College of Health  
84 Sciences, department of Medical Laboratory Sciences research ethics review committee  
85 (DRERC/538/20/MLS) and it was in accordance with the principles of the Helsinki II  
86 declaration. Laboratory test results were communicated to the responsible clinicians working at  
87 the treatment center. Written informed consent was obtained from the study participants. All the  
88 information obtained from the study participants were kept confidential.

## 89 ***Study population***

90 In this study, we have included 455 consecutive patients with confirmed SARS-CoV-2 infection  
91 admitted to Millennium COVID-19 treatment center, Addis Ababa, Ethiopia from July 1-  
92 October 23, 2020. The treatment center is the first referral center for COVID-19 patients in  
93 Ethiopia, since May 02, 2020. None of the study participants were receiving anticoagulant

94 medications before blood drawing. Diagnosis of SARS-CoV-2 infection was made with real time  
95 PCR.

## 96 *Sample collection and coagulation profile analysis*

### 97 *2.6. Laboratory Analysis*

98 Venous bloods were collected by professional nurses working in the treatment center: 5 mL in  
99 EDTA and 3 mL in 3.2% sodium citrated anti-coagulated tube for analysis of coagulation  
100 parameters. The samples for coagulation tests were collected at hospital admission. The  
101 prothrombin time (PT), activated partial prothrombin time (APTT), and international normalized  
102 ratio (INR) were analyzed using HUMACLOT DUE PLUS<sup>®</sup> coagulation analyzer (Wiesbaden<sup>®</sup>,  
103 Germany). Platelet count was performed using UniCel<sup>®</sup> DxH 800 Coulter<sup>®</sup> Cellular Analysis  
104 System (Beckman Coulter<sup>®</sup>, Inc. 4300 N. Harbor Blvd. Fullerton, CA 92835). The coagulation  
105 parameters were compared with the manufacturer cut off normal range of  
106 PT = 11.7- 15 seconds, APTT = 23.8- 37.9 seconds, INR = 1.0- 1.2 and PLT= 159-386/ $\mu$ .l. The  
107 coagulation parameters above the cut off range were considered as a prolonged ~~time~~ and  
108 thrombocytopenia in the case of lower than cut off value for platelet. All laboratory tests and ~~its~~  
109 interpretation were done following the manufacturers' recommendation and standard operating  
110 procedures.

### 111 *Statistical Analysis*

112 Statistical Package for the Social Sciences (SPSS) software version 25.0 (SPSS<sup>®</sup> Inc., Chicago,  
113 IL, USA) was used for statistical analysis. Chi-square test was used to determine association  
114 among categorical variables. The quantitative data were expressed as Mean  $\pm$  SD. P value < 0.05  
115 was considered as statistically significant.

116

117 **Results**

118 ***Socio-demographic and Clinical characteristics of Study participants***

119 In this study, 455 patients diagnosed with COVID-19 were included. Among the study  
120 participants, 289 (63.5%) were males. The study participants were between the age of 4 and 90  
121 years with a mean of  $49.9 \pm 18.3$  years. From the total 455 case, there were 297 mild cases, 90  
122 severe cases, and 68 critical cases based on disease severity of COVID-19(Table 1).

123 **Table 1:** Socio-demographic characteristics of study participants

| Variables        |             | Frequency | Percent |
|------------------|-------------|-----------|---------|
| Gender           | Male        | 289       | 63.5%   |
|                  | Female      | 166       | 36.5%   |
| Age group        | 0-18 years  | 15        | 3.2%    |
|                  | 18-35 years | 101       | 22.1%   |
|                  | 36-55 years | 158       | 34.7%   |
|                  | >55 years   | 181       | 39.7%   |
| Disease severity | Moderate    | 297       | 65.2%   |
|                  | Severe      | 90        | 19.8%   |
|                  | Critical    | 68        | 15%     |

124 The median time from the disease onset to admission was 4 days (2-8 days). Severe and critical  
 125 groups showed differences in sex ratio and age distribution. In severe (36.6%) and critical groups  
 126 (48.5%), were elderly males of the age of >55 years old. y-(Table 2).

127

128 **Table 2: Socio-demographic characteristics and disease severity of COVID-19 patients**

| Variables     |               | Disease Severity |               |                 | P-value |
|---------------|---------------|------------------|---------------|-----------------|---------|
|               |               | Moderate, n (%)  | Severe, n (%) | Critical, n (%) |         |
| Age(year)     | 0-18, n= 15   | 10(66.7)         | 4(26.7)       | 1(6.7)          | 0.283   |
|               | 18-35, n=101  | 65(64.35)        | 22(21.78)     | 14(13.8)        |         |
|               | 36-55, n=158  | 107(67.7)        | 31(19.6)      | 20(12.65)       |         |
|               | >55, n=181    | 115(63.5)        | 33(18.2)      | 33(8.2)         |         |
| Sex,<br>N=455 | Male, n=289   | 187(64.7)        | 56(19.3)      | 46(15.9)        | 0.045   |
|               | Female, n=166 | 110(66.2)        | 34(20.4)      | 22(13.2)        |         |

129 ***Magnitude of coagulation abnormalities***

130 In this study, 209 COVID-19 patients (46%) showed prolonged PT and higher INR values.  
 131 Among those patients with prolonged PT, 51.3% were above 55 years of age. Prolonged PT  
 132 values were demonstrated more frequently among males (49.8%) than females (41%) and this  
 133 difference was statistically different(P = 0.045). Similarly, 51.4% and 53.3% of ICU (critical)  
 134 and severe patients had prolonged PT values. Notably, prolonged APTT values were found  
 135 among 43.1% of individuals, and from these 47%, 45% and 41% were among ICU (critical),  
 136 severe and moderate patients, respectively. 57.2% of female patients had prolonged APTT; and  
 137 51.3% of patients aged older than 55 years had a prolonged APTT.



138 Thrombocytopenia was detected in 22.1% (101 out of 455) study subjects. 50.5% (50 out of 99)  
 139 patients aged older than 55 years had thrombocytopenia and the occurrence was higher among  
 140 male (23.8%) than female (18%) ICU patients (Table 3).

141

| <b>Coagulation Parameters</b> |                 | <b>Variables</b>     |                       |                       |                        |                      |                        |                          |                        |                          |
|-------------------------------|-----------------|----------------------|-----------------------|-----------------------|------------------------|----------------------|------------------------|--------------------------|------------------------|--------------------------|
|                               |                 | <b>Age</b>           |                       |                       |                        | <b>Sex</b>           |                        | <b>Disease Severity</b>  |                        |                          |
|                               |                 | <b>0-18<br/>n(%)</b> | <b>19-35<br/>n(%)</b> | <b>36-55<br/>n(%)</b> | <b>&gt;55<br/>n(%)</b> | <b>Male<br/>n(%)</b> | <b>Female<br/>n(%)</b> | <b>Moderate<br/>n(%)</b> | <b>Severe<br/>n(%)</b> | <b>Critical<br/>n(%)</b> |
| PT                            | High<br>n=213   | 9(4.2)               | 50(23.47)             | 61(28.6)              | 93(43.6)               | 144(67.6)            | 69(32.4)               | 130(61)                  | 48(22.5)               | 35(16.4)                 |
|                               | Normal<br>n=220 | 6(2.7)               | 45(20.45)             | 89(40.4)              | 80(36.3)               | 131(59.5)            | 89(40.4)               | 149(67.7)                | 40(18.1)               | 31(14.1)                 |
|                               | Low=22          | 0                    | 6(27.2)               | 8(36.3)               | 8(36.3)                | 14(63.6)             | 8(36.3)                | 18(81)                   | 2(9)                   | 2(9)                     |
| APTT                          | High=196        | 6(3)                 | 46(23.4)              | 68(34.7)              | 76(38.77)              | 101(51.5)            | 95(48.5)               | 115(58.67)               | 41(21)                 | 42(21.4)                 |
|                               | Normal<br>n=193 | 6(3.1)               | 38(19.7)              | 70(36.2)              | 79(41)                 | 136(70.4)            | 57(29.5)               | 137(71)                  | 36(18.6)               | 21(10.8)                 |
|                               | Low<br>n=66     | 3(4.5)               | 17(25.7)              | 20(30.3)              | 26(39.3)               | 52(78.7)             | 14(21)                 | 45(68)                   | 13(19.7)               | 5(7.5)                   |
| PLT                           | High<br>n=65    | 4(6.1)               | 11(17)                | 24(37)                | 26(40)                 | 43(66)               | 22(33.8)               | 39(60)                   | 8(12.3)                | 8(12.3)                  |
|                               | Normal<br>n=289 | 8(3)                 | 70(24.2)              | 105(36.3)             | 105(36.3)              | 175(60.8)            | 114(39)                | 214(74)                  | 44(15)                 | 31(10.6)                 |
|                               | Low<br>n=101    | 3(2.9)               | 20(20)                | 28(27.7)              | 50(49.5)               | 69(69.70)            | 30(30.3)               | 33(32)                   | 38(37.6)               | 30(29.7)                 |
| INR                           | High<br>n=210   | 9(4.2)               | 50(24.7)              | 60(28.5)              | 91(43.3)               | 141(67)              | 69(32.8)               | 127(60.4)                | 50(23.8)               | 33(15.7)                 |

|                 |        |          |          |          |          |          |           |         |          |
|-----------------|--------|----------|----------|----------|----------|----------|-----------|---------|----------|
| Normal<br>n=224 | 5(2.2) | 44(19.6) | 93(41.5) | 82(36.6) | 115(51)  | 75(33.4) | 113(50.4) | 45(20)  | 32(14.2) |
| Low<br>n=21     | 1(4.7) | 7(33.3)  | 5(23.8)  | 8(38)    | 14(66.6) | 7(33.3)  | 15(71)    | 3(14.5) | 3(14.5)  |

142 **Table 3: Result of coagulation parameters in patients with severe COVID-19 according to**  
143 **different variables**

144 PLT=platelet; PT= prothrombin time; APTT=activated partial thromboplastin time;  
145 INR=international normalized ratio.

146 **Discussion**

147 The COVID-19 pandemic had a major impact on health care globally. COVID-19 has already  
148 caused >1.2 million deaths worldwide and more than 1400 in Ethiopia as of October 30,2020  
149 according to WHO report(15). Coagulation abnormalities are frequent in COVID-19 patients  
150 and are associated with poor prognosis and reduced survival(7). The dysregulation of  
151 coagulation and associated with hypercoagulability in patients with COVID, manifest as venous  
152 and arterial thrombosis and multiorgan dysfunction(16);-which are poor prognostic markers  
153 ~~resulting in increased mortality and hospitalization and ICU admission~~ (13, 14, 17-19). Previous  
154 studies indicated that coagulopathy in patients hospitalized with COVID-19 is characterized by  
155 ~~increase~~ in coagulation parameters such as PT, APTT and INR (20, 21).

156 Patients with serious infection are more likely to have COVID-19 associated coagulopathy than  
157 patients with a mild infection (21,22). In our study, prolonged PT, APTT and INR was more  
158 frequent among severe and critical COVID-19 patients. Similarly, studies also reported that  
159 thrombotic complications are common among COVID-19 patients admitted to intensive care unit  
160 (ICU) ~~(9.5%-47%)~~(22-24).

161 Treatment of the underlying condition is suggested to be paramount in coagulopathies. It is  
162 shown that bleeding is not common clinical manifestation in COVID-19 infections despite  
163 abnormal coagulation parameters (23,24). and supportive care including blood product  
164 transfusion should be individualized in COVID -19 patients(25, 26). Laboratory findings alone  
165 should not be taken as basis for instituting blood transfusion therapy, rather it should be reserved  
166 for those who are bleeding, requires an invasive procedure, or who are otherwise at high risk for  
167 bleeding complications (26, 27).

168 Published studies indicate that COVID-19 is associated with a hyper-coagulable state. Venous  
169 thromboembolism (VTE) and arterial thrombosis ranging from 15% to 30% were found in  
170 critically ill patients with COVID-19 and about 7% in those admitted to medical wards (28-30).  
171 Abnormal thrombosis of different medical devices, deep vein thrombosis and multiple thrombi in  
172 the vessels of the lungs, kidneys and other organs at autopsy of patients who died of Covid-19  
173 have been reported serving as the impetus behind guidelines (9, 29)which support the use of  
174 therapeutic doses of heparin or low-molecular-weight heparin instead of prophylactic doses in  
175 critically ill COVID-19 patients (12, 26, 31).In the current study, thrombocytopenia was  
176 observed among males (23.8%) than females (19.8%) and older people (27.6%). Severe  
177 (42.68%) and critical (42%) patients also had thrombocytopenia and this was in line with studies  
178 conducted in different countries (20, 22, 32, 33). Thrombocytopenia, defined as platelet count  
179 less than  $100 \times 10^9$  cells/L were independently associated with COVID-19 severity(34). Studies  
180 suggest that routine coagulation test results are markers of disease severity and assist in  
181 management decision.In critically ill patients, thrombocytopenia correlates with multi-organ  
182 failure and death, and a decline in platelet count, even in the absence of overt thrombocytopenia,  
183 portends a worse outcome (9, 12, 13). In patients who are not bleeding, there is no evidence that

184 correction of laboratory parameters with blood products improves outcomes. Replacement might  
185 worsen disseminated thrombosis and further deplete scarce blood products (28, 35).

186 Many studies reported that coagulopathy associated with COVID-19 is characterized by  
187 thrombocytopenia, prolongation of the prothrombin time, high levels of D-dimer, and elevated  
188 levels of fibrinogen, factor VIII, and von Willebrand factor (3, 11, 16). ~~The degree of~~  
189 ~~coagulation abnormalities in critically ill non-COVID patients correlates with disease severity~~  
190 ~~and predict the risk of thrombosis, the need for ventilator support, and mortality.~~ Published  
191 studies ~~support~~ that COVID-19-associated coagulopathy is characterized by a decreased platelet  
192 count (9, 36-38). ~~Patients with critical COVID-19 infection~~ and a cytokine storm ~~have~~ an  
193 extreme hyper-coagulable state. Even though the reason for this life-threatening condition is not  
194 known, this might be due to an uncontrolled hyper-inflammatory response without previous  
195 immunity (39, 40).

196 **Conclusion:** In this study, prolonged prothrombin time and high INR were found among severe  
197 and critical COVID-19 patients. Thrombocytopenia and prolonged ~~APTT~~ were dominant in  
198 COVID-19 patients older than 55 years. Thus, we recommend emphasis to be given for  
199 monitoring of platelet count, PT, APTT and INR in hospitalized COVID-19 patients  
200 management.

201 **Consent for publication:** Not applicable

202 **Availability of data and material**

203 All the available data were included in the manuscript.

204 **Funding:** None

205 **Conflict of interest:** The authors declare that they have no conflict of interest.

206 References

- 207 1. Sohrabi C, Alsafi Z, O'Neill N, Khan M, Kerwan A, Al-Jabir A, et al. World Health  
208 Organization declares global emergency: A review of the 2019 novel coronavirus (COVID-19).  
209 Int J Surg. 2020;76:71-6.
- 210 2. World Health Organization. Who coronavirus disease (covid-19) dashboard  
211 2020, November 8 [Available from: <https://covid19.who.int/info>].
- 212 3. Long H, Nie L, Xiang X, Li H, Zhang X, Fu X, et al. D-Dimer and Prothrombin Time  
213 Are the Significant Indicators of Severe COVID-19 and Poor Prognosis. BioMed research  
214 international. 2020;2020:6159720.
- 215 4. Guan WJ, Ni ZY, Hu Y, Liang WH, Ou CQ, He JX, et al. Clinical Characteristics of  
216 Coronavirus Disease 2019 in China. The New England journal of medicine. 2020;382(18):1708-  
217 20.
- 218 5. Aggarwal M, Dass J, Mahapatra M. Hemostatic Abnormalities in COVID-19: An  
219 Update. Indian J Hematol Blood Transfus. 2020:1-11.
- 220 6. Coccheri S. COVID-19: The crucial role of blood coagulation and fibrinolysis. Intern  
221 Emerg Med. 2020;15(8):1369-73.
- 222 7. Quintana-Díaz M, Andrés-Esteban EM, Ramírez-Cervantes KL, Olivan-Blázquez B,  
223 Juárez-Vela R, Gea-Caballero V. Coagulation Parameters: An Efficient Measure for Predicting  
224 the Prognosis and Clinical Management of Patients with COVID-19. Journal of Clinical  
225 Medicine. 2020;9(11).
- 226 8. Parasher A. COVID-19: Current understanding of its pathophysiology, clinical  
227 presentation and treatment. Postgrad Med J. 2020.
- 228 9. Al-Samkari H, Karp Leaf RS, Dzik WH, Carlson JCT, Fogerty AE, Waheed A, et al.  
229 COVID-19 and coagulation: bleeding and thrombotic manifestations of SARS-CoV-2 infection.  
230 Blood. 2020;136(4):489-500.
- 231 10. Annunziata A, Imitazione P, Polistina GE, Lanza M, Coppola A, Fiorentino G.  
232 Pulmonary Embolism in Covid-19: Coagulation Parameters, Close Monitoring to Prevent? Turk  
233 Thorac J. 2020;21(4):287-8.
- 234 11. Savioli F, Rocha LL. Coagulation profile in severe COVID-19 patients: what do we  
235 know so far? Revista Brasileira de Terapia Intensiva. 2020;32(2).
- 236 12. Buioni D, Nardi P, Ruvolo G. Thrombocytopenia and coagulation disorders due to  
237 COVID 19 infection with concomitant cardiovascular diseases requiring anti-platelet and  
238 anticoagulant therapy, which strategy? Clin Chim Acta. 2020;508:109.
- 239 13. Levi M. COVID-19 coagulopathy vs disseminated intravascular coagulation. Blood Adv.  
240 2020;4(12):2850.
- 241 14. Quintana-Diaz M, Andres-Esteban EM, Ramirez-Cervantes KL, Olivan-Blazquez B,  
242 Juarez-Vela R, Gea-Caballero V. Coagulation Parameters: An Efficient Measure for Predicting  
243 the Prognosis and Clinical Management of Patients with COVID-19. J Clin Med. 2020;9(11).
- 244 15. WHO. COVID19. 2020. Contract No.:
- 245 .
- 246 16. Chan NC, Weitz JI. COVID-19 coagulopathy, thrombosis, and bleeding. Blood.  
247 2020;41:100648.

- 248 17. Rauch A, Labreuche J, Lassalle F, Goutay J, Caplan M, Charbonnier L, et al. Coagulation  
249 biomarkers are independent predictors of increased oxygen requirements in COVID-19. *J*  
250 *Thromb Haemost.* 2020.
- 251 18. Zhang Y, He L, Chen H, Lu S, Xiong Y, Liu J, et al. Manifestations of blood coagulation  
252 and its relation to clinical outcomes in severe COVID-19 patients: Retrospective analysis. *Int J*  
253 *Lab Hematol.* 2020.
- 254 19. Zhang A, Leng Y, Zhang Y, Wu K, Ji Y, Lei S, et al. Meta-analysis of coagulation  
255 parameters associated with disease severity and poor prognosis of COVID-19. *International*  
256 *journal of infectious diseases : IJID : official publication of the International Society for*  
257 *Infectious Diseases.* 2020;100:441-8.
- 258 20. Luo HC, You CY, Lu SW, Fu YQ. Characteristics of coagulation alteration in patients  
259 with COVID-19. *Ann Hematol.* 2020.
- 260 21. Levi M, Thachil J, Iba T, Levy JH. Coagulation abnormalities and thrombosis in patients  
261 with COVID-19. *Lancet Haematol.* 2020;7(6):e438-e40.
- 262 22. Zou Y, Guo H, Zhang Y, Zhang Z, Liu Y, Wang J, et al. Analysis of coagulation  
263 parameters in patients with COVID-19 in Shanghai, China. *Biosci Trends.* 2020;14(4):285-9.
- 264 23. Sayad B, Rahimi Z. Blood coagulation parameters in patients with severe COVID-19  
265 from Kermanshah Province, Islamic Republic of Iran. *East Mediterr Health J.* 2020;26(9):999-  
266 1004.
- 267 24. Adam EH, Zacharowski K, Miesbach W. A comprehensive assessment of the coagulation  
268 profile in critically ill COVID-19 patients. *Thromb Res.* 2020;194:42-4.
- 269 25. Paar V, Wernly B, Zhou Z, Motloch LJ, Hoppe UC, Egle A, et al. Anti-coagulation for  
270 COVID-19 treatment: both anti-thrombotic and anti-inflammatory? *J Thromb Thrombolysis.*  
271 2020.
- 272 26. Belen-Apak FB, Sarialioglu F. Pulmonary intravascular coagulation in COVID-19:  
273 possible pathogenesis and recommendations on anticoagulant/thrombolytic therapy. *J Thromb*  
274 *Thrombolysis.* 2020;50(2):278-80.
- 275 27. Lee AY, Connors JM, Kreuziger LB, Murphy M, Gernsheimer T, Lin Y, et al. COVID-  
276 19 and Coagulopathy 2020, December 1 [Available from: [https://www.hematology.org/COVID-](https://www.hematology.org/COVID-19/COVID-19-and-coagulopathy)  
277 [19/COVID-19-and-coagulopathy](https://www.hematology.org/COVID-19/COVID-19-and-coagulopathy)].
- 278 28. Harenberg J, Favaloro E. COVID-19: progression of disease and intravascular  
279 coagulation - present status and future perspectives. *Clin Chem Lab Med.* 2020;58(7):1029-36.
- 280 29. Pizzi R, Gini G, Caiano L, Castelli B, Dotan N, Magni F, et al. Coagulation parameters  
281 and venous thromboembolism in patients with and without COVID-19 admitted to the  
282 Emergency Department for acute respiratory insufficiency. *Thromb Res.* 2020;196:209-12.
- 283 30. Voicu S, Delrue M, Chousterman BG, Stepanian A, Bonnin P, Malissin I, et al.  
284 Imbalance between procoagulant factors and natural coagulation inhibitors contributes to  
285 hypercoagulability in the critically ill COVID-19 patient: clinical implications. *Eur Rev Med*  
286 *Pharmacol Sci.* 2020;24(17):9161-8.
- 287 31. Mei H, Hu Y. [Characteristics, causes, diagnosis and treatment of coagulation  
288 dysfunction in patients with COVID-19]. *Zhonghua Xue Ye Xue Za Zhi.* 2020;41(3):185-91.
- 289 32. Bao C, Tao X, Cui W, Yi B, Pan T, Young KH, et al. SARS-CoV-2 induced  
290 thrombocytopenia as an important biomarker significantly correlated with abnormal coagulation  
291 function, increased intravascular blood clot risk and mortality in COVID-19 patients. *Exp*  
292 *Hematol Oncol.* 2020;9:16.

- 293 33. Xiong M, Liang X, Wei YD. Changes in blood coagulation in patients with severe  
294 coronavirus disease 2019 (COVID-19): a meta-analysis. *Br J Haematol.* 2020;189(6):1050-2.  
295 34. Kander T. Coagulation disorder in COVID-19. *The Lancet Haematology.*  
296 2020;7(9):e630-e2.  
297 35. Song JC, Wang G, Zhang W, Zhang Y, Li WQ, Zhou Z, et al. Chinese expert consensus  
298 on diagnosis and treatment of coagulation dysfunction in COVID-19. *Mil Med Res.*  
299 2020;7(1):19.  
300 36. Chen X, Wang Q, Xu M, Li C. A Retrospective Analysis of the Coagulation Dysfunction  
301 in COVID-19 Patients. *Clin Appl Thromb Hemost.* 2020;26:1076029620964868.  
302 37. Pavoni V, Giancesello L, Pazzi M, Stera C, Meconi T, Frigieri FC. Evaluation of  
303 coagulation function by rotation thromboelastometry in critically ill patients with severe  
304 COVID-19 pneumonia. *J Thromb Thrombolysis.* 2020;50(2):281-6.  
305 38. Savioli F, Rocha LL. Coagulation profile in severe COVID-19 patients: what do we  
306 know so far? *Rev Bras Ter Intensiva.* 2020;32(2):197-9.  
307 39. Jose RJ, Manuel A. COVID-19 cytokine storm: the interplay between inflammation and  
308 coagulation. *Lancet Respir Med.* 2020;8(6):e46-e7.  
309 40. Kasinathan G, Sathar J. Haematological manifestations, mechanisms of thrombosis and  
310 anti-coagulation in COVID-19 disease: A review. *Ann Med Surg (Lond).* 2020;56:173-7.

311

312





26 **Abstract**

27 **Background:** Coagulopathy and thromboembolic events are among the complications of Corona  
28 Virus disease 2019 (COVID-19). Thus, abnormal coagulation profiles in COVID-19 patients are  
29 taken as important prognostic factors of COVID-19 disease severity. The aim of this study was  
30 to analyze coagulation profiles of hospitalized COVID-19 patients in Addis Ababa, Ethiopia.

31 **Methods:** This cross-sectional study was conducted among 455 Covid-19 patients admitted at  
32 Millennium COVID-19 treatment center, Addis Ababa, Ethiopia from July 1- October 23, 2020.  
33 Prothrombin Time (PT), Activated Partial Thromboplastin Time (APTT) and International  
34 normalized ratio (INR) were ~~estimated by~~determined on HUMACLOT DUE PLUS coagulation  
35 analyzer (Wiesbaden, Germany). In all tests,  $p < 0.05$  was defined as statistically significant.

36 **Result:** A prolonged prothrombin time was found ~~inamong~~ 46.8% of study subjects with  
37 COVID-19 and a prolonged prothrombin time and elevated INR with 53.3% of study subjects  
38 with severe and 51 % of critically COVID patients.~~Prolonged prothrombin time and high INR~~  
39 ~~were seen among 53.3% severe and 51% critical patients with COVID 19 manifestation.~~  
40 Thrombocytopenia was detected in 22.1% of COVID-19 patients. 50.5% and 51.3% of COVID-  
41 19 patients ~~aged~~ older than 55 years had thrombocytopenia and prolonged APTT respectively.

42 **Conclusion:**

43 In this study, prolonged prothrombin time and high INR were detected in around 50% of severe  
44 ~~found among severe~~ and critical COVID-19 patients. Thrombocytopenia and prolonged APTT  
45 were dominant in COVID-19 patients older than 55 years. Thus, we recommend emphasis to be  
46 given for monitoring of platelet count, PT, APTT and INR in hospitalized COVID-19 patients  
47 management.

48 **Key words:** COVID-19, Prothrombin time, activated partial thromboplastin time, international  
49 normalized ratio, Platelet, Addis Ababa, Ethiopia.

50

## 51 **Introduction**

52 Coronavirus disease 2019 (COVID-19) is caused by a novel beta corona virus called severe acute  
53 respiratory syndrome coronavirus 2 (SARS-CoV-2)(1). COVID-19 has become a pandemic that  
54 has heavily affected the global population. As of November 8, 2020, there have been 49,578,590  
55 confirmed cases of COVID-19 and 1,245,717 deaths, reported to World Health organization  
56 (WHO). Similarly, there have been 99,204 confirmed cases of COVID-19 with 1,518 deaths in  
57 Ethiopia(2).

58 The severity of COVID-19 varies considerably from asymptomatic to life threatening, lung  
59 injury being the main clinical manifestation. Most of the patients have a favorable prognosis, but  
60 some rapidly progress to severe and critical cases with respiratory distress syndrome, coagulation  
61 dysfunction and multiple organ failures (3, 4). Although the pathophysiology and the underlining  
62 mechanisms of clinical manifestations remain unclear, thrombo-inflammation and cytokine  
63 storm are clearly established components in Severe Acute Respiratory Distress Syndrome  
64 (SARS) of COVID-19(5-8).

65 Coagulopathy and abnormal coagulation profiles were indicated among the most significant  
66 markers of poor prognosis in COVID-19 patients (9-11). A retrospective cohort study conducted  
67 in Spain Madrid ~~demonstrated that~~ showed COVID-19 non-survivors had significantly lower  
68 prothrombin activity, abnormal coagulation parameters like prolonged PT, APTT, higher D-  
69 dimer and higher fibrinogen levels compared to survivors indicating coagulation parameters  
70 could be an efficient measure for ~~improving the clinical management and~~ predicting the  
71 prognosis of patients with SARS COV-2(7) and guiding management. Similarly, Long et al has  
72 reported that occurrence of coagulation dysfunction is more likely in severe and critically ill  
73 patients. The study also showed that D-dimer and prothrombin time could be considered as main

74 indicators in predicting the mortality of COVID-19 patients(3). ~~Different studies also support~~  
75 ~~that COVID-19 patients are at high risk of developing disseminated intravascular coagulation~~  
76 ~~(12,13).~~

77 Several studies have also demonstrated the increased occurrence of intravascular disseminated  
78 coagulopathy (DIC) in patients with COVID-19 (12,13). The result of blood coagulation  
79 parameters in COVID-19 can also guide management decisions and improve outcomes (12,14).

80 ~~It is also indicated that comparison of reports from various populations related to the clinical~~  
81 ~~course, outcome of COVID-19 and blood coagulation profile in these patients are necessary to~~  
82 ~~help the management and treatment of the disease (12,14). Moreover, this routine coagulation~~  
83 ~~parameter tests results could potentially be utilized in symptomatic patients in resource limited~~  
84 ~~settings with inadequate access to COVID-19 RT-PCR , as in Ethiopia, to raise suspension of~~  
85 ~~this infection. could be used as potential indicators for COVID-19 in individuals having typical~~  
86 ~~clinical manifestations that would be inputs for prompt patient management especially in~~  
87 ~~resource limited settings where the high-tech gold standard RT-PCR is not widely available, like~~  
88 ~~Ethiopia.~~ However, data on coagulation profiles among Ethiopian COVID-19 patients is not  
89 readily available~~searee~~. Thus, the aim of this study was to determine~~find out~~ the coagulation  
90 profile of COVID-19 patients admitted at Millennium COVID-19 treatment center, Addis  
91 Ababa, Ethiopia.

## 92 **Methods**

93 **Ethical consideration:** The study was approved by Addis Ababa University College of Health  
94 Sciences, department of Medical Laboratory Sciences research ethics review committee  
95 (DRERC/538/20/MLS) and it was in accordance with the principles of the Helsinki II

96 declaration. Laboratory test results were communicated to the responsible clinicians working at  
97 the treatment center. Written informed consent was obtained from the study participants. All the  
98 information obtained from the study participants were kept confidential.

### 99 *Study population*

100 In this study, we have included 455 consecutive patients with confirmed SARS-CoV-2 infection  
101 ~~and~~ admitted to Millennium COVID-19 treatment center, Addis Ababa, Ethiopia from July 1-  
102 October 23, 2020. The treatment center is the first referral center ~~for~~ COVID-19 patients in  
103 Ethiopia, since May 02, 2020. None of the study participants ~~were receiving~~ ~~was taking~~  
104 anticoagulant medications before blood drawing. Diagnosis of SARS-CoV-2 infection was made  
105 ~~with according to~~ real time PCR.

### 106 *Sample collection and coagulation profile analysis*

#### 107 *2.6. Laboratory Analysis*

108 ~~Eight milliliters of v~~ Venous blood were collected by professional nurses working in the  
109 treatment center: ~~5 mL~~ ~~five milliliters~~ in EDTA ~~for platelet count, three milliliters~~ ~~and 3 mL~~ in  
110 3.2% sodium citrated anti-coagulated tube for analysis of coagulation parameters. The samples  
111 for coagulation tests were collected at hospital admission. The prothrombin time (PT), activated  
112 partial prothrombin time (APTT), and international normalized ratio (INR) were analyzed using  
113 HUMACLOT DUE PLUS<sup>®</sup> coagulation analyzer (Wiesbaden<sup>®</sup>, Germany). Platelet count was  
114 performed using UniCel<sup>®</sup> DxH 800 Coulter<sup>®</sup> Cellular Analysis System (Beckman Coulter<sup>®</sup>,  
115 Inc. 4300 N. Harbor Blvd. Fullerton, CA 92835). The coagulation parameters were compared  
116 with the manufacturer cut off normal range of PT = 11.7- 15 seconds,

117 APTT = 23.8- 37.9 seconds, INR = 1.0- 1.2 and PLT= 159-386/ $\mu$ .l. The coagulation parameters  
118 above the cut off range were considered as a prolonged time and thrombocytopenia in the case of  
119 lower than cut off value for platelet. All laboratory tests and its interpretation were done  
120 following the manufacturers' recommendation and standard operating procedures.

## 121 *Statistical Analysis*

122 Statistical Package for the Social Sciences (SPSS) software version 25.0 (SPSS<sup>®</sup> Inc., Chicago,  
123 IL, USA) was used for statistical analysis. Chi-square test was used to determine association  
124 among categorical variables. The quantitative data were expressed as Mean  $\pm$  SD. P value < 0.05  
125 was considered as statistically significant.

## 126 *Results*

### 127 *Socio-demographic and Clinical characteristics of Study participants*

128 In this study, 455 patients diagnosed with COVID-19 were included. Among the study  
129 participants, 289 (63.5%) were males. The study participants were between the age of 4 and 90  
130 years with a mean of 49.9  $\pm$ 18.3 years. From the total 455 case, there were 297 mild cases, 90  
131 severe cases, and 68 critical cases based on disease severity of COVID-19 (Table 1).

132 **Table 1:** Socio-demographic characteristics of study participants ~~Addis Ababa, Ethiopia, 2020~~

| Variables |            | Frequency | Percent |
|-----------|------------|-----------|---------|
| Gender    | Male       | 289       | 63.5%   |
|           | Female     | 166       | 36.5%   |
| Age group | 0-18 years | 15        | 3.2%    |

|                  |             |     |       |
|------------------|-------------|-----|-------|
|                  | 18-35 years | 101 | 22.1% |
|                  | 36-55 years | 158 | 34.7% |
|                  | >55 years   | 181 | 39.7% |
| Disease severity | Moderate    | 297 | 65.2% |
|                  | Severe      | 90  | 19.8% |
|                  | Critical    | 68  | 15%   |

133 The median time from the disease onset to admission was 4 days (2-8 days). Severe and critical  
134 groups showed differences in sex ratio and age distribution. In ~~severe~~ severe (36.6%) and critical  
135 groups (48.5%), majority were elderly males of the age of >55 years old. males and elderly  
136 (Table 2).

137 **Table 2: Socio-demographic characteristics and disease severity of COVID-19 patients**  
138 ***admitted to Millennium COVID-19 treatment center Addis Ababa, Ethiopia***

| Variables     |               | Disease Severity |               |                 | P-value |
|---------------|---------------|------------------|---------------|-----------------|---------|
|               |               | Moderate, n (%)  | Severe, n (%) | Critical, n (%) |         |
| Age(year)     | 0-18, n= 15   | 10(66.7)         | 4(26.7)       | 1(6.7)          | 0.283   |
|               | 18-35, n=101  | 65(64.35)        | 22(21.78)     | 14(13.8)        |         |
|               | 36-55, n=158  | 107(67.7)        | 31(19.6)      | 20(12.65)       |         |
|               | >55, n=181    | 115(63.5)        | 33(18.2)      | 33(8.2)         |         |
| Sex,<br>N=455 | Male, n=289   | 187(64.7)        | 56(19.3)      | 46(15.9)        | 0.045   |
|               | Female, n=166 | 110(66.2)        | 34(20.4)      | 22(13.2)        |         |

139 ***Magnitude of coagulation abnormalities***

140 In this study, 209 COVID-19 patients (46%) showed prolonged PT and higher INR values.  
 141 Among those patients with prolonged PT, 51.3% were above 55 years of age. Prolonged PT  
 142 values ~~were demonstrated more~~ ~~was found among~~ ~~frequently among~~ males (49.8%) than females  
 143 (41%) ~~and this difference was statistically different~~ ~~and it has a significant association with~~  
 144 ~~gender~~ (P = 0.045). Similarly, 51.4% and 53.3% of ICU (critical) and severe patients had  
 145 prolonged PT values. Notably, prolonged APTT values were found among 43.1% of individuals,  
 146 and from these 47%, 45% and 41% were among ICU (critical), severe and moderate patients,  
 147 respectively. 57.2% of female patients had prolonged APTT; and 51.3% of patients aged older  
 148 than 55 years had a prolonged APTT.

149 Thrombocytopenia was detected in 22.1% (101 out of 455) ~~study subjects~~ ~~22.1% individuals~~.  
 150 50.5% (50 out of 99) patients aged older than 55 years had thrombocytopenia ~~and the~~  
 151 ~~occurrence~~. ~~Thrombocytopenia~~ was higher among male (23.8%) than female (18%) ICU patients  
 152 (Table 3).

| <i>Coagulation Parameters</i> |              | <i>Variables</i>     |                       |                       |                        |                      |                        |                          |                        |                          |
|-------------------------------|--------------|----------------------|-----------------------|-----------------------|------------------------|----------------------|------------------------|--------------------------|------------------------|--------------------------|
|                               |              | <i>Age</i>           |                       |                       |                        | <i>Sex</i>           |                        | <i>Disease Severity</i>  |                        |                          |
|                               |              | <i>0-18<br/>n(%)</i> | <i>19-35<br/>n(%)</i> | <i>36-55<br/>n(%)</i> | <i>&gt;55<br/>n(%)</i> | <i>Male<br/>n(%)</i> | <i>Female<br/>n(%)</i> | <i>Moderate<br/>n(%)</i> | <i>Severe<br/>n(%)</i> | <i>Critical<br/>n(%)</i> |
| PT                            | High n=213   | 9(4.2)               | 50(23.47)             | 61(28.6)              | 93(43.6)               | 144(67.6)            | 69(32.4)               | 130(61)                  | 48(22.5)               | 35(16.4)                 |
|                               | Normal n=220 | 6(2.7)               | 45(20.45)             | 89(40.4)              | 80(36.3)               | 131(59.5)            | 89(40.4)               | 149(67.7)                | 40(18.1)               | 31(14.1)                 |
|                               | Low=22       | 0                    | 6(27.2)               | 8(36.3)               | 8(36.3)                | 14(63.6)             | 8(36.3)                | 18(81)                   | 2(9)                   | 2(9)                     |
| APTT                          | High=196     | 6(3)                 | 46(23.4)              | 68(34.7)              | 76(38.77)              | 101(51.5)            | 95(48.5)               | 115(58.67)               | 41(21)                 | 42(21.4)                 |
|                               | Normal       | 6(3.1)               | 38(19.7)              | 70(36.2)              | 79(41)                 | 136(70.4)            | 57(29.5)               | 137(71)                  | 36(18.6)               | 21(10.8)                 |



|     |              |        |          |           |           |           |          |           |          |          |
|-----|--------------|--------|----------|-----------|-----------|-----------|----------|-----------|----------|----------|
|     | n=193        |        |          |           |           |           |          |           |          |          |
|     | Low n=66     | 3(4.5) | 17(25.7) | 20(30.3)  | 26(39.3)  | 52(78.7)  | 14(21)   | 45(68)    | 13(19.7) | 5(7.5)   |
| PLT | High n=65    | 4(6.1) | 11(17)   | 24(37)    | 26(40)    | 43(66)    | 22(33.8) | 39(60)    | 8(12.3)  | 8(12.3)  |
|     | Normal n=289 | 8(3)   | 70(24.2) | 105(36.3) | 105(36.3) | 175(60.8) | 114(39)  | 214(74)   | 44(15)   | 31(10.6) |
|     | Low n= 101   | 3(2.9) | 20(20)   | 28(27.7)  | 50(49.5)  | 69(69.70) | 30(30.3) | 33(32)    | 38(37.6) | 30(29.7) |
| INR | High n=210   | 9(4.2) | 50(24.7) | 60(28.5)  | 91(43.3)  | 141(67)   | 69(32.8) | 127(60.4) | 50(23.8) | 33(15.7) |
|     | Normal =224  | 5(2.2) | 44(19.6) | 93(41.5)  | 82(36.6)  | 115(51)   | 75(33.4) | 113(50.4) | 45(20)   | 32(14.2) |
|     | Low n=21     | 1(4.7) | 7(33.3)  | 5(23.8)   | 8(38)     | 14(66.6)  | 7(33.3)  | 15(71)    | 3(14.5)  | 3(14.5)  |

153 *Table 3: Result of coagulation parameters in patients with severe COVID-19 according to different*  
154 *variables*

155 PLT=platelet; PT= prothrombin time; APTT=activated partial thromboplastin time;  
156 INR=international normalized ratio.

## 157 Discussion

158 The COVID-19 pandemic ~~has brought~~had a major impact on health care globally. COVID-19  
159 has already caused >1.2 million deaths worldwide and more than 1400 in Ethiopia as of October  
160 30,2020 according to WHO report(15). Coagulation abnormalities are ~~indicated as~~ frequent  
161 ~~findings~~ in COVID-19 patients and are associated with poor prognosis and reduced survival(7).  
162 ~~Similarly, it is also indicated that coagulopathy which is resulted due to~~The dysregulation of  
163 coagulation and associated with hypercoagulability in patients with COVID manifest as~~as~~  
164 ~~evidenced by~~ venous and arterial thrombosis and multiorgan dysfunction(16); which are poor  
165 prognostic markers resulting in increased mortality and hospitalization and ICU admission is one~~one~~  
166 ~~of the most significant prognostic factors in patients with COVID-19 and is associated with~~  
167 ~~increased hospitalization, admission to critical care, and mortality~~(14, 17-19). Previous studies

168 indicated that coagulopathy in patients hospitalized with COVID-19 is characterized by increase  
169 in coagulation parameters such as PT, APTT and INR ~~levels~~ (20, 21).

170 Patients with serious infection are more likely to have COVID-19 associated coagulopathy than  
171 patients with a mild infection (21,22). In our study, prolonged PT, APTT an INR was more  
172 frequent~~found~~ among severe and critical COVID-19 patients ~~than moderate ones~~. Similarly,  
173 studies also reported that thrombotic complications are common among COVID-19 patients  
174 admitted to intensive care unit (ICU) (9.5%-47%)(22-24).

175 Treatment of the underlying condition is suggested to be paramount in coagulopathies. It is  
176 shown that bleeding is not common clinical manifestation in COVID-19 infections despite  
177 abnormal coagulation parameters (23,24). ~~Along these, it is suggested that~~and supportive care  
178 including blood product transfusion should be individualized in COVID -19 patients(25, 26).  
179 Laboratory findings alone should not be taken as basis for instituting blood transfusion therapy,  
180 rather it should be reserved for those who are bleeding, requires an invasive procedure, or who  
181 are otherwise at high risk for bleeding complications (26, 27).

182 Published studies~~Evidences~~ indicate that COVID-19 is associated with a hyper-coagulable state.  
183 Venous thromboembolism (VTE) and arterial thrombosis ranging from 15% to 30% were found  
184 in critically ill patients with COVID-19 and about 7% in those admitted to medical wards (28-  
185 30). ~~Clotting is reported from~~Abnormal thrombosis of different medical devices ~~used~~, deep vein  
186 thrombosis and multiple thrombi in the vessels of the lungs, kidneys and other organs ~~at~~from  
187 autopsy of patients who died of Covid-19 have been reported serving as the impetus behind  
188 guidelines -(9, 29)-~~which support the use of~~ ~~These indicate clinicians to use~~ therapeutic doses of  
189 heparin or low-molecular-weight heparin instead of prophylactic doses in critically ill COVID-  
190 19 patients (12, 26, 31). In the current study, thrombocytopenia was observed among males

191 (23.8%) than females (19.8%) and older people (27.6%). Severe (42.68%) and critical (42%)  
192 patients also had thrombocytopenia and this was in line with studies conducted in different  
193 countries (20, 22, 32, 33). Thrombocytopenia, defined as platelet count less than  $100 \times 10^9$  cells/L  
194 were independently associated with COVID-19 severity(34). Studies ~~aeross~~ suggested that  
195 routine coagulation test ~~resultss can be considered~~ are markers of disease severity and assist in  
196 management decision.as a significant marker to help clinicians assess prognosis and severity of  
197 patients with COVID-19. In critically ill patients, thrombocytopenia correlates with multi-organ  
198 failure and death, and a decline in platelet count, even in the absence of overt thrombocytopenia,  
199 portends a worse outcome (9, 12, 13). In patients who are not bleeding, there is no evidence that  
200 correction of laboratory parameters with blood products improves outcomes. Replacement might  
201 worsen disseminated thrombosis and further deplete scarce blood products (28, 35).

202 Many studies reported that coagulopathy associated with COVID-19 is characterized by  
203 thrombocytopenia, prolongation of the prothrombin time, high levels of D-dimer, and elevated  
204 levels of fibrinogen, factor VIII, and von Willebrand factor (3, 11, 16). The degree of  
205 coagulation abnormalities in critically ill non-COVID patients correlates with disease severity  
206 and predict the risk of thrombosis, the need for ventilator support, and mortality. Published  
207 studies support that COVID-19-associated coagulopathy is ~~however unique~~ characterized by  
208 ~~with a much a~~ decreased platelet count-count (9, 36-38). Patients with critical COVID-19  
209 infection and a cytokine storm have an extreme hyper-coagulable state. Even though the reason  
210 for this life-threatening condition is not known, this might be due to an uncontrolled hyper-  
211 inflammatory response without previous immunity (39, 40).

212 **Conclusion:** In this study, prolonged prothrombin time and high INR were found among severe  
213 and critical COVID-19 patients. Thrombocytopenia and prolonged APTT were dominant in  
214 COVID-19 patients older than 55 years. Thus, we recommend emphasis to be given for  
215 monitoring of platelet count, PT, APTT and INR in hospitalized COVID-19 patients  
216 management.

217 ~~**Ethical Clearance:** Ethical clearance was obtained from Addis Ababa University, College of  
218 Health Science, Department of Medical Laboratory Sciences, Research ethics review committee  
219 and it was in accordance with the principles of the Helsinki II declaration.~~

220 **Consent for publication:** Not applicable

#### 221 **Availability of data and material**

222 All the available data were included in the manuscript.

223 **Funding:** None.

224 **Conflict of interest:** The authors declare that they have no conflict of interest.

#### 225 **References**

- 226 1. Sohrabi C, Alsafi Z, O'Neill N, Khan M, Kerwan A, Al-Jabir A, et al. World Health  
227 Organization declares global emergency: A review of the 2019 novel coronavirus (COVID-19).  
228 Int J Surg. 2020;76:71-6.
- 229 2. World Health Organization. Who coronavirus disease (covid-19) dashboard  
230 2020, November 8 [Available from: <https://covid19.who.int/info>].
- 231 3. Long H, Nie L, Xiang X, Li H, Zhang X, Fu X, et al. D-Dimer and Prothrombin Time  
232 Are the Significant Indicators of Severe COVID-19 and Poor Prognosis. BioMed research  
233 international. 2020;2020:6159720.
- 234 4. Guan WJ, Ni ZY, Hu Y, Liang WH, Ou CQ, He JX, et al. Clinical Characteristics of  
235 Coronavirus Disease 2019 in China. The New England journal of medicine. 2020;382(18):1708-  
236 20.
- 237 5. Aggarwal M, Dass J, Mahapatra M. Hemostatic Abnormalities in COVID-19: An  
238 Update. Indian J Hematol Blood Transfus. 2020:1-11.

- 239 6. Coccheri S. COVID-19: The crucial role of blood coagulation and fibrinolysis. *Intern*  
240 *Emerg Med.* 2020;15(8):1369-73.
- 241 7. Quintana-Díaz M, Andrés-Esteban EM, Ramírez-Cervantes KL, Olivan-Blázquez B,  
242 Juárez-Vela R, Gea-Caballero V. Coagulation Parameters: An Efficient Measure for Predicting  
243 the Prognosis and Clinical Management of Patients with COVID-19. *Journal of Clinical*  
244 *Medicine.* 2020;9(11).
- 245 8. Parasher A. COVID-19: Current understanding of its pathophysiology, clinical  
246 presentation and treatment. *Postgrad Med J.* 2020.
- 247 9. Al-Samkari H, Karp Leaf RS, Dzik WH, Carlson JCT, Fogerty AE, Waheed A, et al.  
248 COVID-19 and coagulation: bleeding and thrombotic manifestations of SARS-CoV-2 infection.  
249 *Blood.* 2020;136(4):489-500.
- 250 10. Annunziata A, Imitazione P, Polistina GE, Lanza M, Coppola A, Fiorentino G.  
251 Pulmonary Embolism in Covid-19: Coagulation Parameters, Close Monitoring to Prevent? *Turk*  
252 *Thorac J.* 2020;21(4):287-8.
- 253 11. Savioli F, Rocha LL. Coagulation profile in severe COVID-19 patients: what do we  
254 know so far? *Revista Brasileira de Terapia Intensiva.* 2020;32(2).
- 255 12. Buioni D, Nardi P, Ruvolo G. Thrombocytopenia and coagulation disorders due to  
256 COVID 19 infection with concomitant cardiovascular diseases requiring anti-platelet and  
257 anticoagulant therapy, which strategy? *Clin Chim Acta.* 2020;508:109.
- 258 13. Levi M. COVID-19 coagulopathy vs disseminated intravascular coagulation. *Blood Adv.*  
259 2020;4(12):2850.
- 260 14. Quintana-Diaz M, Andres-Esteban EM, Ramirez-Cervantes KL, Olivan-Blazquez B,  
261 Juarez-Vela R, Gea-Caballero V. Coagulation Parameters: An Efficient Measure for Predicting  
262 the Prognosis and Clinical Management of Patients with COVID-19. *J Clin Med.* 2020;9(11).
- 263 15. WHO. COVID19. 2020. Contract No.:
- 264 .
- 265 16. Chan NC, Weitz JI. COVID-19 coagulopathy, thrombosis, and bleeding. *Blood.*  
266 2020;41:100648.
- 267 17. Rauch A, Labreuche J, Lassalle F, Goutay J, Caplan M, Charbonnier L, et al. Coagulation  
268 biomarkers are independent predictors of increased oxygen requirements in COVID-19. *J*  
269 *Thromb Haemost.* 2020.
- 270 18. Zhang Y, He L, Chen H, Lu S, Xiong Y, Liu J, et al. Manifestations of blood coagulation  
271 and its relation to clinical outcomes in severe COVID-19 patients: Retrospective analysis. *Int J*  
272 *Lab Hematol.* 2020.
- 273 19. Zhang A, Leng Y, Zhang Y, Wu K, Ji Y, Lei S, et al. Meta-analysis of coagulation  
274 parameters associated with disease severity and poor prognosis of COVID-19. *International*  
275 *journal of infectious diseases : IJID : official publication of the International Society for*  
276 *Infectious Diseases.* 2020;100:441-8.
- 277 20. Luo HC, You CY, Lu SW, Fu YQ. Characteristics of coagulation alteration in patients  
278 with COVID-19. *Ann Hematol.* 2020.
- 279 21. Levi M, Thachil J, Iba T, Levy JH. Coagulation abnormalities and thrombosis in patients  
280 with COVID-19. *Lancet Haematol.* 2020;7(6):e438-e40.
- 281 22. Zou Y, Guo H, Zhang Y, Zhang Z, Liu Y, Wang J, et al. Analysis of coagulation  
282 parameters in patients with COVID-19 in Shanghai, China. *Biosci Trends.* 2020;14(4):285-9.

- 283 23. Sayad B, Rahimi Z. Blood coagulation parameters in patients with severe COVID-19  
284 from Kermanshah Province, Islamic Republic of Iran. *East Mediterr Health J.* 2020;26(9):999-  
285 1004.
- 286 24. Adam EH, Zacharowski K, Miesbach W. A comprehensive assessment of the coagulation  
287 profile in critically ill COVID-19 patients. *Thromb Res.* 2020;194:42-4.
- 288 25. Paar V, Wernly B, Zhou Z, Motloch LJ, Hoppe UC, Egle A, et al. Anti-coagulation for  
289 COVID-19 treatment: both anti-thrombotic and anti-inflammatory? *J Thromb Thrombolysis.*  
290 2020.
- 291 26. Belen-Apak FB, Sarialioglu F. Pulmonary intravascular coagulation in COVID-19:  
292 possible pathogenesis and recommendations on anticoagulant/thrombolytic therapy. *J Thromb*  
293 *Thrombolysis.* 2020;50(2):278-80.
- 294 27. Lee AY, Connors JM, Kreuziger LB, Murphy M, Gernsheimer T, Lin Y, et al. COVID-  
295 19 and Coagulopathy 2020, December 1 [Available from: [https://www.hematology.org/COVID-  
296 19/COVID-19-and-coagulopathy](https://www.hematology.org/COVID-19/COVID-19-and-coagulopathy)].
- 297 28. Harenberg J, Favaloro E. COVID-19: progression of disease and intravascular  
298 coagulation - present status and future perspectives. *Clin Chem Lab Med.* 2020;58(7):1029-36.
- 299 29. Pizzi R, Gini G, Caiano L, Castelli B, Dotan N, Magni F, et al. Coagulation parameters  
300 and venous thromboembolism in patients with and without COVID-19 admitted to the  
301 Emergency Department for acute respiratory insufficiency. *Thromb Res.* 2020;196:209-12.
- 302 30. Voicu S, Delrue M, Chousterman BG, Stepanian A, Bonnin P, Malissin I, et al.  
303 Imbalance between procoagulant factors and natural coagulation inhibitors contributes to  
304 hypercoagulability in the critically ill COVID-19 patient: clinical implications. *Eur Rev Med*  
305 *Pharmacol Sci.* 2020;24(17):9161-8.
- 306 31. Mei H, Hu Y. [Characteristics, causes, diagnosis and treatment of coagulation  
307 dysfunction in patients with COVID-19]. *Zhonghua Xue Ye Xue Za Zhi.* 2020;41(3):185-91.
- 308 32. Bao C, Tao X, Cui W, Yi B, Pan T, Young KH, et al. SARS-CoV-2 induced  
309 thrombocytopenia as an important biomarker significantly correlated with abnormal coagulation  
310 function, increased intravascular blood clot risk and mortality in COVID-19 patients. *Exp*  
311 *Hematol Oncol.* 2020;9:16.
- 312 33. Xiong M, Liang X, Wei YD. Changes in blood coagulation in patients with severe  
313 coronavirus disease 2019 (COVID-19): a meta-analysis. *Br J Haematol.* 2020;189(6):1050-2.
- 314 34. Kander T. Coagulation disorder in COVID-19. *The Lancet Haematology.*  
315 2020;7(9):e630-e2.
- 316 35. Song JC, Wang G, Zhang W, Zhang Y, Li WQ, Zhou Z, et al. Chinese expert consensus  
317 on diagnosis and treatment of coagulation dysfunction in COVID-19. *Mil Med Res.*  
318 2020;7(1):19.
- 319 36. Chen X, Wang Q, Xu M, Li C. A Retrospective Analysis of the Coagulation Dysfunction  
320 in COVID-19 Patients. *Clin Appl Thromb Hemost.* 2020;26:1076029620964868.
- 321 37. Pavoni V, Giancesello L, Pazzi M, Stera C, Meconi T, Frigieri FC. Evaluation of  
322 coagulation function by rotation thromboelastometry in critically ill patients with severe  
323 COVID-19 pneumonia. *J Thromb Thrombolysis.* 2020;50(2):281-6.
- 324 38. Savioli F, Rocha LL. Coagulation profile in severe COVID-19 patients: what do we  
325 know so far? *Rev Bras Ter Intensiva.* 2020;32(2):197-9.
- 326 39. Jose RJ, Manuel A. COVID-19 cytokine storm: the interplay between inflammation and  
327 coagulation. *Lancet Respir Med.* 2020;8(6):e46-e7.

328 40. Kasinathan G, Sathar J. Haematological manifestations, mechanisms of thrombosis and  
329 anti-coagulation in COVID-19 disease: A review. *Ann Med Surg (Lond)*. 2020;56:173-7.  
330
