# Supplementary material for: Blood coagulation parameter abnormalities in hospitalized patients with confirmed COVID-19 in Ethiopia
Source: PubMed Central journal article supplement (PMC8216564; doi:10.1371/journal.pone.0252939), 2021-06-21
Supplement: pone.0252939.s004.pdf [file pone.0252939.s004.pdf]

# PLOS ONE

## Blood coagulation parameter abnormalities in hospitalized patients with confirmed COVID-19 in Ethiopia --Manuscript Draft--

|                               |                                                                                                                                                                                                                                                                                                                                                                                                                                                                                                                                                                                                                                                                                                                                                                                                                                                                                                                                                                                                                                                                                                                                                                                                                                                                                                                                                                                                                                                                                                                                                                                                                                                                           |
|-------------------------------|---------------------------------------------------------------------------------------------------------------------------------------------------------------------------------------------------------------------------------------------------------------------------------------------------------------------------------------------------------------------------------------------------------------------------------------------------------------------------------------------------------------------------------------------------------------------------------------------------------------------------------------------------------------------------------------------------------------------------------------------------------------------------------------------------------------------------------------------------------------------------------------------------------------------------------------------------------------------------------------------------------------------------------------------------------------------------------------------------------------------------------------------------------------------------------------------------------------------------------------------------------------------------------------------------------------------------------------------------------------------------------------------------------------------------------------------------------------------------------------------------------------------------------------------------------------------------------------------------------------------------------------------------------------------------|
| <b>Manuscript Number:</b>     | PONE-D-20-35898R3                                                                                                                                                                                                                                                                                                                                                                                                                                                                                                                                                                                                                                                                                                                                                                                                                                                                                                                                                                                                                                                                                                                                                                                                                                                                                                                                                                                                                                                                                                                                                                                                                                                         |
| <b>Article Type:</b>          | Research Article                                                                                                                                                                                                                                                                                                                                                                                                                                                                                                                                                                                                                                                                                                                                                                                                                                                                                                                                                                                                                                                                                                                                                                                                                                                                                                                                                                                                                                                                                                                                                                                                                                                          |
| <b>Full Title:</b>            | Blood coagulation parameter abnormalities in hospitalized patients with confirmed COVID-19 in Ethiopia                                                                                                                                                                                                                                                                                                                                                                                                                                                                                                                                                                                                                                                                                                                                                                                                                                                                                                                                                                                                                                                                                                                                                                                                                                                                                                                                                                                                                                                                                                                                                                    |
| <b>Short Title:</b>           | Coagulation profile of COVID-19 patients                                                                                                                                                                                                                                                                                                                                                                                                                                                                                                                                                                                                                                                                                                                                                                                                                                                                                                                                                                                                                                                                                                                                                                                                                                                                                                                                                                                                                                                                                                                                                                                                                                  |
| <b>Corresponding Author:</b>  | Shambel Araya<br>Addis Ababa University<br>Addis Ababa, ETHIOPIA                                                                                                                                                                                                                                                                                                                                                                                                                                                                                                                                                                                                                                                                                                                                                                                                                                                                                                                                                                                                                                                                                                                                                                                                                                                                                                                                                                                                                                                                                                                                                                                                          |
| <b>Keywords:</b>              | COVID-19; Prothrombin time; activated partial thromboplastin time; international normalized ratio; platelet; Addis Ababa; Ethiopia                                                                                                                                                                                                                                                                                                                                                                                                                                                                                                                                                                                                                                                                                                                                                                                                                                                                                                                                                                                                                                                                                                                                                                                                                                                                                                                                                                                                                                                                                                                                        |
| <b>Abstract:</b>              | <p><b>Background :</b> Coagulopathy and thromboembolic events are among the complications of Corona Virus disease 2019 (COVID-19). Thus, abnormal coagulation profiles in COVID-19 patients are taken as important prognostic factors of COVID-19 disease severity. The aim of this study was to analyze coagulation profiles of hospitalized COVID-19 patients in Addis Ababa, Ethiopia. <b>Methods :</b> This cross-sectional study was conducted among 455 Covid-19 patients admitted at Millennium COVID-19 treatment center, Addis Ababa, Ethiopia from July 1- October 23, 2020. Prothrombin Time (PT), Activated Partial Thromboplastin Time (APTT) and International normalized ratio (INR) were determined on HUMACLOT DUE PLUS coagulation analyzer (Wiesbaden, Germany) . In all tests, <math>p &lt; 0.05</math> was defined as statistically significant. <b>Result :</b> A prolonged prothrombin time was found in 46.8% of study subjects with COVID-19 and a prolonged prothrombin time and elevated INR with 53.3% of study subjects with severe and 51 % of critically COVID patients. Thrombocytopenia was detected in 22.1% of COVID-19 patients. 50.5% and 51.3% of COVID-19 patients older than 55 years had thrombocytopenia and prolonged APTT respectively. <b>Conclusion :</b></p> <p>In this study, prolonged prothrombin time and high INR were detected in around 50% of severe and critical COVID-19 patients. Thrombocytopenia and prolonged APTT were dominant in COVID-19 patients older than 55 years. Thus, we recommend emphasis to be given for monitoring of platelet count, PT, APTT and INR in hospitalized COVID-19 patients.</p> |
| <b>Order of Authors:</b>      | Shambel Araya, MSc<br>Mintesnot Aragaw Mamo<br>Yakob Gebregziabher Tsegay<br>Aschalew Ayteneu<br>Abebe Hordofa<br>AbebeEdao Negeso<br>Zemenu Tamir<br>Tirhas Niguse<br>Mahlet Cheru<br>Asegdew Atlaw<br>Moges Wordofa                                                                                                                                                                                                                                                                                                                                                                                                                                                                                                                                                                                                                                                                                                                                                                                                                                                                                                                                                                                                                                                                                                                                                                                                                                                                                                                                                                                                                                                     |
| <b>Response to Reviewers:</b> | General Comments<br>The reviewer felt that the manuscript was substantially improved but there are still a number of grammatical and typographical errors that should be corrected. Again, it is recommended that the manuscript is reviewed by a native English language speaker.                                                                                                                                                                                                                                                                                                                                                                                                                                                                                                                                                                                                                                                                                                                                                                                                                                                                                                                                                                                                                                                                                                                                                                                                                                                                                                                                                                                        |

Dear reviewers and editors

We have carefully consider your comments and we have incorporated all your comments and recommendations

The manuscript have also reviewed by a native English language speaker

Specific comments

Comment 1: Abstract, background section:  
 “Thus”, “taken as” and “COVID-19” was removed as per your suggestion in line 28 & 29

Comment 2: Abstract, method section:  
 Insert trade mark: inserted  
 Remove tests and replace it with statistical analysis results: accepted and replaced

Comment 3: Result section: “with” is replaced with ‘in’ in line

Comment 4: abstract, conclusion section.  
 Replace “around” with “more than”

Comment5: Introduction section:  
 Dear editor and reviewers, all comments and suggestions given in introduction section were accepted and amended accordingly  
 Remove “heavily” in line 52  
 Replace 49,578, 490 with “more than 1.4 million” in line 53  
 Insert with lung injury in line 56  
 Remove and critical cases with

Comment 6: method section:  
 Dear editor and reviewers, all comments and suggestions given in method section were accepted and amended accordingly

Insert “personal identifying” in line 87: accepted and inserted  
 Delete “time”, “its” in line 107 and 108  
 Replace Platelet with platelets in line 108

Comment 6: Result section:  
 Dear editor and reviewers, all comments and suggestions given in result section were accepted and amended accordingly  
 Delete Y in line 126  
 Delete N=455 in table 1  
 Replace “higher” with “elevated”  
 Move heading of table 3 to the top

Comment 6: Discussion section:  
 Dear editor and reviewers, all comments and suggestions given in discussion section were accepted and amended accordingly  
 Replace “and” with “is” in line 153  
 Replace in “patients with COVID” with “and” in line 151  
 Delete “resulting in increased mortality and hospitalization and ICU admission” in line 153  
 Change manifest in to manifests and increase in to increases  
 Delete “(9.5%-47%)” in line 160  
 Insert “More frequently” in line 176 and 177  
 Rephrase the sentences from line 188-193  
 Before: The degree of coagulation abnormalities in critically ill non-COVID patients correlates with disease severity and predict the risk of thrombosis, the need for ventilator support, and mortality. Published studies support that COVID-19-associated coagulopathy is characterized by a decreased platelet count (9, 36-38). Patients with critical COVID-19 infection and a cytokine storm have an extreme hyper-coagulable state.  
 Modified: Published studies indicate that COVID-19-associated coagulopathy is characterized by a decreased platelet count (9, 36-38)and a cytokine storm with an extreme hyper-coagulable state.

Comment 6: Discussion section:  
 Replace “APTT” with “clotting time assays”

Response: Dear editors and reviewers all of the above listed comments, recommendations and suggestions are accepted, replaced and corrected and we thank you very much for your valuable comments & time.  
 Looking forward to hearing from you. Thank you again for your consideration!  
 Sincerely,  
 Shambel Araya (BSc, MSc, PhD fellow)

**Additional Information:**

| Question                                                                                                                                                                                                                                                                                                                                                                                                                                                                                                                                                                                                                                                                                                                                                                                                                                                                                                                                                                                                                                                                                                                                                                                                                                                                                                                                                                            | Response                                                           |
|-------------------------------------------------------------------------------------------------------------------------------------------------------------------------------------------------------------------------------------------------------------------------------------------------------------------------------------------------------------------------------------------------------------------------------------------------------------------------------------------------------------------------------------------------------------------------------------------------------------------------------------------------------------------------------------------------------------------------------------------------------------------------------------------------------------------------------------------------------------------------------------------------------------------------------------------------------------------------------------------------------------------------------------------------------------------------------------------------------------------------------------------------------------------------------------------------------------------------------------------------------------------------------------------------------------------------------------------------------------------------------------|--------------------------------------------------------------------|
| <p><b>Financial Disclosure</b></p> <p>Enter a financial disclosure statement that describes the sources of funding for the work included in this submission. Review the <a href="#">submission guidelines</a> for detailed requirements. View published research articles from <a href="#">PLOS ONE</a> for specific examples.</p> <p>This statement is required for submission and <b>will appear in the published article</b> if the submission is accepted. Please make sure it is accurate.</p> <p><b>Unfunded studies</b><br/>Enter: <i>The author(s) received no specific funding for this work.</i></p> <p><b>Funded studies</b><br/>Enter a statement with the following details:</p> <ul style="list-style-type: none"> <li>• Initials of the authors who received each award</li> <li>• Grant numbers awarded to each author</li> <li>• The full name of each funder</li> <li>• URL of each funder website</li> <li>• Did the sponsors or funders play any role in the study design, data collection and analysis, decision to publish, or preparation of the manuscript?</li> <li>• <b>NO</b> - Include this sentence at the end of your statement: <i>The funders had no role in study design, data collection and analysis, decision to publish, or preparation of the manuscript.</i></li> <li>• <b>YES</b> - Specify the role(s) played.</li> </ul> <p>* typeset</p> | <p>The author(s) received no specific funding for this work.</p>   |
| <p><b>Competing Interests</b></p> <p>Use the instructions below to enter a competing interest statement for this submission. On behalf of all authors, disclose any <a href="#">competing interests</a> that could be perceived to bias this work—acknowledging all financial support and any other relevant financial or non-financial competing interests.</p> <p>This statement <b>will appear in the published article</b> if the submission is</p>                                                                                                                                                                                                                                                                                                                                                                                                                                                                                                                                                                                                                                                                                                                                                                                                                                                                                                                             | <p>The authors have declared that no competing interests exist</p> |

accepted. Please make sure it is accurate. View published research articles from [PLOS ONE](#) for specific examples.

**NO authors have competing interests**

Enter: *The authors have declared that no competing interests exist.*

**Authors with competing interests**

Enter competing interest details beginning with this statement:

*I have read the journal's policy and the authors of this manuscript have the following competing interests: [insert competing interests here]*

\* typeset

**Ethics Statement**

Enter an ethics statement for this submission. This statement is required if the study involved:

- Human participants
- Human specimens or tissue
- Vertebrate animals or cephalopods
- Vertebrate embryos or tissues
- Field research

Write "N/A" if the submission does not require an ethics statement.

General guidance is provided below. Consult the [submission guidelines](#) for detailed instructions. **Make sure that all information entered here is included in the Methods section of the manuscript.**

Addis Ababa University College of Health Science Department of Medical Laboratory Science research ethics review committee (DRERC) protocol number: DRERC/538/20/MLS

**Format for specific study types**

**Human Subject Research (involving human participants and/or tissue)**

- Give the name of the institutional review board or ethics committee that approved the study
- Include the approval number and/or a statement indicating approval of this research
- Indicate the form of consent obtained (written/oral) or the reason that consent was not obtained (e.g. the data were analyzed anonymously)

**Animal Research (involving vertebrate animals, embryos or tissues)**

- Provide the name of the Institutional Animal Care and Use Committee (IACUC) or other relevant ethics board that reviewed the study protocol, and indicate whether they approved this research or granted a formal waiver of ethical approval
- Include an approval number if one was obtained
- If the study involved *non-human primates*, add *additional details* about animal welfare and steps taken to ameliorate suffering
- If anesthesia, euthanasia, or any kind of animal sacrifice is part of the study, include briefly which substances and/or methods were applied

**Field Research**

Include the following details if this study involves the collection of plant, animal, or other materials from a natural setting:

- Field permit number
- Name of the institution or relevant body that granted permission

**Data Availability**

Authors are required to make all data underlying the findings described fully available, without restriction, and from the time of publication. PLOS allows rare exceptions to address legal and ethical concerns. See the [PLOS Data Policy](#) and [FAQ](#) for detailed information.

Yes - all data are fully available without restriction

A Data Availability Statement describing where the data can be found is required at submission. Your answers to this question constitute the Data Availability Statement and **will be published in the article**, if accepted.

**Important:** Stating 'data available on request from the author' is not sufficient. If your data are only available upon request, select 'No' for the first question and explain your exceptional situation in the text box.

Do the authors confirm that all data underlying the findings described in their manuscript are fully available without restriction?

**Describe where the data may be found in full sentences. If you are copying our sample text, replace any instances of XXX with the appropriate details.**

- If the data are **held or will be held in a public repository**, include URLs, accession numbers or DOIs. If this information will only be available after acceptance, indicate this by ticking the box below. For example: *All XXX files are available from the XXX database (accession number(s) XXX, XXX).*
- If the data are all contained **within the manuscript and/or Supporting Information files**, enter the following: *All relevant data are within the manuscript and its Supporting Information files.*
- If neither of these applies but you are able to provide **details of access elsewhere**, with or without limitations, please do so. For example:

*Data cannot be shared publicly because of [XXX]. Data are available from the XXX Institutional Data Access / Ethics Committee (contact via XXX) for researchers who meet the criteria for access to confidential data.*

*The data underlying the results presented in the study are available from (include the name of the third party*

All relevant data are within the manuscript

|                                                                                                                                                                                                                                         |  |
|-----------------------------------------------------------------------------------------------------------------------------------------------------------------------------------------------------------------------------------------|--|
| <p><i>and contact information or URL).</i></p> <ul style="list-style-type: none"><li>• This text is appropriate if the data are owned by a third party and authors do not have permission to share the data.</li></ul> <p>* typeset</p> |  |
| Additional data availability information:                                                                                                                                                                                               |  |

1 ***Blood coagulation parameter abnormalities in hospitalized patients with confirmed COVID-19***  
2 ***in Ethiopia***

3 Shambel Araya<sup>1&2\*</sup>, Mintesnot Aragaw Mamo<sup>1&2</sup>, Yakob Gebregziabher Tsegay<sup>3&4</sup>, Asegdew Atlaw<sup>2</sup>,  
4 Aschalew Aytene<sup>2</sup>, Abebe Hordofa<sup>2</sup>, Abebe Edao Negeso<sup>1</sup>, Moges Wordofa<sup>1</sup>, Tirhas Niguse<sup>1</sup>, Mahlet  
5 Cheru<sup>1</sup>, Zemenu Tamir<sup>1</sup>

6 <sup>1</sup>Department of Medical Laboratory Sciences, College of Health Sciences, Addis Ababa  
7 University, Addis Ababa, Ethiopia

8 <sup>2</sup>Department of Medical Laboratory, Millennium COVID-19 Treatment and Care Centre,  
9 St. Paul Millennium Medical College, Addis Ababa, Ethiopia;

10 <sup>3</sup>Department of Medical Biotechnology, Institute of Biotechnology, University of  
11 Gondar, Gondar, Ethiopia.

12 <sup>4</sup>Department of Research and development center, College of Health Sciences, Defense  
13 University, Addis Ababa, Ethiopia.

14 Address:

15 1. Shambel Araya (corresponding author); [shambelaraya8@gmail.com](mailto:shambelaraya8@gmail.com)

16 2. Mintesnot Aragaw Mamo: [mintsh2015@gmail.com](mailto:mintsh2015@gmail.com)

17 3. Yakob Gebreegziabher Tsegaye: [yakobtsegay17@gmail.com](mailto:yakobtsegay17@gmail.com)

18 4. Asegdew Atlaw: [asegdew21@gmail.com](mailto:asegdew21@gmail.com)

19 5. Aschalew Aytene: [aschu9033@gmail.com](mailto:aschu9033@gmail.com)

20 6. Abebe Hordofa: [abuhordofa@gmail.com](mailto:abuhordofa@gmail.com)

21 7. Abebe Edao Negeso: [abenegesso@gmail.com](mailto:abenegesso@gmail.com)

22 8. Moges Wordofa: [heranmakmow@gmail.com](mailto:heranmakmow@gmail.com)

23 9. Tirhas Niguse: [peace.for.all.060610@gmail.com](mailto:peace.for.all.060610@gmail.com)

24 10. Mahlet Cheru: [yuluyaya54@gmail.com](mailto:yuluyaya54@gmail.com)

25 11. Zemenu Tamir: [zemenut266@gmail.com](mailto:zemenut266@gmail.com)



26 **Abstract**

27 **Background:** Coagulopathy and thromboembolic events are among the complications of Corona  
28 Virus disease 2019 (COVID-19). Abnormal coagulation parameters in COVID-19 patients are  
29 important prognostic factors of disease severity. The aim of this study was to analyze  
30 coagulation profiles of hospitalized COVID-19 patients in Addis Ababa, Ethiopia. **Methods:**  
31 This prospective cross-sectional study was conducted among 455 Covid-19 patients admitted at  
32 Millennium COVID-19 care and treatment center, Addis Ababa, Ethiopia from July 1- October  
33 23, 2020. Prothrombin Time (PT), Activated Partial Thromboplastin Time (APTT) and  
34 International normalized ratio (INR) were determined on HUMACLOT DUE PLUS®  
35 coagulation analyzer (Wiesbaden, Germany). In all statistical analysis of results,  $p < 0.05$  was  
36 defined as statistically significant.

37 **Result:** A prolonged prothrombin time was found in 46.8% of study participants with COVID-19  
38 and a prolonged prothrombin time and elevated INR in 53.3% of study subjects with severe and  
39 51 % of critically COVID patients. Thrombocytopenia was detected in 22.1% of COVID-19  
40 patients. 50.5% and 51.3% of COVID-19 patients older than 55 years had thrombocytopenia and  
41 prolonged APTT respectively.

42 **Conclusion:**

43 In this study, prolonged prothrombin time and elevated INR were detected in more than 50% of  
44 severe and critical COVID-19 patients. Thrombocytopenia and prolonged APTT were dominant  
45 in COVID-19 patients older than 55 years. Thus, we recommend emphasis to be given for  
46 monitoring of platelet count, PT, APTT and INR in hospitalized and admitted COVID-19  
47 patients.

48 **Key words:** activated partial thromboplastin time, COVID-19, Prothrombin time, international  
49 normalized ratio, Platelet, Addis Ababa, Ethiopia.

50

51 **Introduction**

52 Coronavirus disease 2019 (COVID-19) is caused by a novel beta corona virus called severe acute  
53 respiratory syndrome coronavirus 2 (SARS-CoV-2)(1). COVID-19 has become a pandemic that  
54 has affected the global population. As of November 8, 2020, there have been more than 49  
55 million confirmed cases of COVID-19 and more than 1.2 million deaths, reported to World  
56 Health organization (WHO). Similarly, there have been 99,204 confirmed cases of COVID-19  
57 with 1,518 deaths in Ethiopia(2).

58 The severity of COVID-19 infection ranges considerably from asymptomatic to life threatening,  
59 with lung injury being the main clinical manifestation. Most of the patients have a favorable  
60 prognosis, but some rapidly progress to severe respiratory distress syndrome, coagulation  
61 dysfunction and multiple organ failures (3, 4). Although the pathophysiology and the underlining  
62 mechanisms of clinical manifestations remain unclear, thrombo inflammation and cytokine storm  
63 are clearly established components in Severe Acute Respiratory Distress Syndrome (SARS) of  
64 COVID-19(5-8).

65 Coagulopathy and abnormal coagulation parameters were indicated among the most significant  
66 biomarkers of poor prognosis in COVID-19 patients (9-11). A retrospective cohort study  
67 conducted in Spain Madrid demonstrated that COVID-19 non-survivors had significantly ~~lower~~  
68 ~~prothrombin time,~~ abnormal coagulation parameters such as prolonged PT, APTT, higher D-  
69 dimer and higher fibrinogen levels compared to survivors indicating coagulation parameters  
70 could be an efficient measure for predicting the prognosis of patients with SARS COV-2(7) ~~and~~  
71 ~~used as~~ guiding clinical management. Similarly, Long et al has reported that occurrence of  
72 coagulation dysfunction is more likely in severe and critically ill patients. The study also showed  
73 that D-dimer and prothrombin time could be considered as main indicators in predicting the

74 mortality of COVID-19 patients (3). Many studies have also demonstrated the increased  
75 occurrence of intravascular disseminated coagulopathy (DIC) in patients with COVID-19 (12,  
76 13). The result of blood coagulation profiles in COVID-19 patients can ~~also~~ guide management  
77 decisions and improve outcomes (12, 14).

78 Moreover, routine coagulation parameter tests results could potentially be utilized in  
79 symptomatic patients in resource limited settings with inadequate access to COVID-19 RT-PCR,  
80 as in Ethiopia, to raise suspension of this infection. However, data on coagulation profiles among  
81 Ethiopian COVID-19 patients is not readily available. Thus, the aim of this study was to  
82 determine the coagulation profile of COVID-19 patients admitted at Millennium COVID-19  
83 treatment center, Addis Ababa, Ethiopia.

#### 84 ***Methods***

85 ***Ethical consideration:*** Ethical clearance was obtained and approved by Addis Ababa University  
86 College of Health Sciences, department of Medical Laboratory Sciences research ethics review  
87 committee (DRERC/538/20/MLS) and it was in accordance with the principles of the Helsinki II  
88 declaration. Laboratory test results were communicated to the responsible clinicians working at  
89 COVID-19 care and treatment center. Written informed consent was obtained from the study  
90 participants. All the personal identifying information obtained from the study participants were  
91 kept confidential.

#### 92 ***Study population***

93 In this study, we have included 455 consecutive patients with confirmed SARS-CoV-2 infection  
94 admitted to Millennium COVID-19 treatment center, Addis Ababa, Ethiopia from July 1-  
95 October 23, 2020. The treatment center is the first referral center for COVID-19 patients in

96 Ethiopia, since May 02, 2020. None of the study participants were receiving anticoagulant  
97 medications before blood drawing. Diagnosis of SARS-CoV-2 infection was made with real time  
98 RT-PCR.

### 99 *Sample collection and coagulation profile analysis*

#### 100 **2.6. Laboratory Analysis**

101 Venous bloods were collected by professional nurses working in the COVID-19 care and  
102 treatment center: 5 mL in EDTA and 3 mL in 3.2% sodium citrated anti-coagulated tube for  
103 analysis of coagulation parameters. The samples for coagulation profile tests were collected at  
104 hospital admission. The prothrombin time (PT), activated partial prothrombin time (APTT), and  
105 international normalized ratio (INR) were analyzed using HUMACLOT DUE PLUS®  
106 coagulation analyzer (Wiesbaden®, Germany). Platelet count was performed using UniCel®  
107 DxH 800 Coulter® Cellular Analysis System (Beckman Coulter®, Inc. 4300 N. Harbor Blvd.  
108 Fullerton, CA 92835). The coagulation parameters were compared with the manufacturer cut off  
109 normal range of PT = 11.7- 15 seconds, APTT = 23.8- 37.9 seconds, INR = 1.0- 1.2 and PLT=  
110 159-386/ $\mu$ .l. The coagulation parameters above the cut off value were considered as a prolonged  
111 and thrombocytopenia in the case of lower than cut off value for platelets. All laboratory tests  
112 and interpretation were done following the manufacturers' recommendation and standard  
113 operating procedures set out by the center.

#### 114 **Statistical Analysis**

115 Statistical Package for the Social Sciences (SPSS) software version 25.0 (SPSS® Inc., Chicago,  
116 IL, USA) was used for statistical analysis. Chi-square test was used to determine association

117 among categorical variables. The quantitative data were expressed as Mean  $\pm$  SD. P value  $< 0.05$   
118 was considered as statistically significant.

## 119 **Results**

### 120 ***Socio-demographic and Clinical characteristics of Study participants***

121 In this study, 455 patients diagnosed with COVID-19 were included. Among the study  
122 participants, 289 (63.5%) were males. The study participants were between the age of 4 and 90  
123 years with a mean of  $49.9 \pm 18.3$  years. From the total 455 study subjects, there were 297 mild  
124 cases, 90 severe cases, and 68 critical cases based on disease severity of COVID-19 (Table 1).

125 **Table 1:** Socio-demographic characteristics of study participants

| Variables        |             | Frequency | Percent |
|------------------|-------------|-----------|---------|
| Gender           | Male        | 289       | 63.5%   |
|                  | Female      | 166       | 36.5%   |
| Age group        | 0-18 years  | 15        | 3.2%    |
|                  | 18-35 years | 101       | 22.1%   |
|                  | 36-55 years | 158       | 34.7%   |
|                  | >55 years   | 181       | 39.7%   |
| Disease severity | Moderate    | 297       | 65.2%   |
|                  | Severe      | 90        | 19.8%   |
|                  | Critical    | 68        | 15%     |

126 The median time from the disease onset to admission was 4 days (2-8 days). Severe and critical  
127 groups showed differences in sex ratio and age distribution. In severe (36.6%) and critical groups  
128 (48.5%), were elderly males of the age of >55 years old. (Table 2).

129

130 **Table 2: Socio-demographic characteristics and disease severity of COVID-19 patients**

| Variables |               | Disease Severity |               |                 | P-value |
|-----------|---------------|------------------|---------------|-----------------|---------|
|           |               | Moderate, n (%)  | Severe, n (%) | Critical, n (%) |         |
| Age(year) | 0-18, n= 15   | 10(66.7)         | 4(26.7)       | 1(6.7)          | 0.283   |
|           | 18-35, n=101  | 65(64.35)        | 22(21.78)     | 14(13.8)        |         |
|           | 36-55, n=158  | 107(67.7)        | 31(19.6)      | 20(12.65)       |         |
|           | >55, n=181    | 115(63.5)        | 33(18.2)      | 33(8.2)         |         |
| Sex,      | Male, n=289   | 187(64.7)        | 56(19.3)      | 46(15.9)        | 0.045   |
|           | Female, n=166 | 110(66.2)        | 34(20.4)      | 22(13.2)        |         |

131

132 ***Magnitude of coagulation abnormalities***

133 In this study, 209 COVID-19 patients (46%) showed prolonged PT and elevated INR values.

134 Among those study participants with prolonged PT, 51.3% were above 55 years of age.

135 Prolonged PT values were demonstrated more frequently among males (49.8%) than females

136 (41%) and this difference was statistically significant ( $P = 0.045$ ). Similarly, 51.4% and 53.3% of

137 ICU (critical) and severe patients had prolonged PT values. Notably, prolonged APTT values

138 were found among 43.1% of individuals, and from these 47%, 45% and 41% were among ICU

139 (critical), severe and moderate patients, respectively. 57.2% of female patients had prolonged

140 APTT; and 51.3% of patients aged older than 55 years had a prolonged APTT.

141 Thrombocytopenia was detected in 22.1% (101 out of 455) study subjects. 50.5% (50 out of 99)

142 patients aged older than 55 years had thrombocytopenia and the occurrence was higher among

143 male (23.8%) than female (18%) ICU patients (Table 3).

144

145 **Table 3: Result of coagulation parameters in patients with severe COVID-19 according to**  
 146 **different variables**

| <b>Coagulation parameters</b> |              | <b>Variables</b> |                   |                   |                    |                  |                    |                         |                    |                      |
|-------------------------------|--------------|------------------|-------------------|-------------------|--------------------|------------------|--------------------|-------------------------|--------------------|----------------------|
|                               |              | <b>Age</b>       |                   |                   |                    | <b>Sex</b>       |                    | <b>Disease severity</b> |                    |                      |
|                               |              | <b>0-18 n(%)</b> | <b>19-35 n(%)</b> | <b>36-55 n(%)</b> | <b>&gt;55 n(%)</b> | <b>Male n(%)</b> | <b>Female n(%)</b> | <b>Moderate n(%)</b>    | <b>Severe n(%)</b> | <b>Critical n(%)</b> |
| <b>PT</b>                     | High n=213   | 9(4.2)           | 50(23.47)         | 61(28.6)          | 93(43.6)           | 144(67.6)        | 69(32.4)           | 130(61)                 | 48(22.5)           | 35(16.4)             |
|                               | Normal n=220 | 6(2.7)           | 45(20.45)         | 89(40.4)          | 80(36.3)           | 131(59.5)        | 89(40.4)           | 149(67.7)               | 40(18.1)           | 31(14.1)             |
|                               | Low=22       | 0                | 6(27.2)           | 8(36.3)           | 8(36.3)            | 14(63.6)         | 8(36.3)            | 18(81)                  | 2(9)               | 2(9)                 |
| <b>APTT</b>                   | High=196     | 6(3)             | 46(23.4)          | 68(34.7)          | 76(38.77)          | 101(51.5)        | 95(48.5)           | 115(58.67)              | 41(21)             | 42(21.4)             |
|                               | Normal n=193 | 6(3.1)           | 38(19.7)          | 70(36.2)          | 79(41)             | 136(70.4)        | 57(29.5)           | 137(71)                 | 36(18.6)           | 21(10.8)             |
|                               | Low n=66     | 3(4.5)           | 17(25.7)          | 20(30.3)          | 26(39.3)           | 52(78.7)         | 14(21)             | 45(68)                  | 13(19.7)           | 5(7.5)               |
| <b>PLT</b>                    | High n=65    | 4(6.1)           | 11(17)            | 24(37)            | 26(40)             | 43(66)           | 22(33.8)           | 39(60)                  | 8(12.3)            | 8(12.3)              |
|                               | Normal n=289 | 8(3)             | 70(24.2)          | 105(36.3)         | 105(36.3)          | 175(60.8)        | 114(39)            | 214(74)                 | 44(15)             | 31(10.6)             |
|                               | Low n= 101   | 3(2.9)           | 20(20)            | 28(27.7)          | 50(49.5)           | 69(69.70)        | 30(30.3)           | 33(32)                  | 38(37.6)           | 30(29.7)             |
| <b>INR</b>                    | High n=210   | 9(4.2)           | 50(24.7)          | 60(28.5)          | 91(43.3)           | 141(67)          | 69(32.8)           | 127(60.4)               | 50(23.8)           | 33(15.7)             |
|                               | Normal =224  | 5(2.2)           | 44(19.6)          | 93(41.5)          | 82(36.6)           | 115(51)          | 75(33.4)           | 113(50.4)               | 45(20)             | 32(14.2)             |
|                               | Low n=21     | 1(4.7)           | 7(33.3)           | 5(23.8)           | 8(38)              | 14(66.6)         | 7(33.3)            | 15(71)                  | 3(14.5)            | 3(14.5)              |

147 PLT=platelet; PT= prothrombin time; APTT=activated partial thromboplastin time;

148 INR=international normalized ratio.

149

150



## 151 **Discussion**

152 The COVID-19 pandemic had a major impact on health care globally. COVID-19 has already  
153 caused >1.2 million deaths worldwide and more than 1400 in Ethiopia as of October 30,2020  
154 according to WHO report(15). Coagulation abnormalities are frequent in COVID-19 patients  
155 and are associated with poor prognosis and reduced survival(7). The dysregulation of  
156 coagulation associated with hypercoagulability manifests as venous and arterial thrombosis and  
157 multiorgan dysfunction (16) which are poor prognostic markers (13, 14, 17-19). Previous studies  
158 indicated that the coagulopathy in patients hospitalized with COVID-19 is characterized by  
159 increases in coagulation parameters such as PT, APTT and INR (20, 21).

160 Patients with serious infection are more likely to have COVID-19 associated coagulopathy than  
161 patients with a mild infection (21, 22). In this recent study, prolonged PT, APTT and INR were  
162 more frequent among severe and critical COVID-19 patients. Similarly, studies also reported that  
163 thrombotic complications are common among COVID-19 patients admitted to intensive care unit  
164 (ICU) (22-24).

165 Treatment of the underlying condition is suggested to be paramount in coagulopathies. It is  
166 shown that bleeding is not common clinical manifestation in COVID-19 infections despite  
167 abnormal coagulation parameters (23,24) and supportive care including blood product  
168 transfusion should be individualized in COVID -19 patients(25, 26). Laboratory findings alone  
169 should not be taken as basis for instituting blood transfusion therapy, rather it should be reserved  
170 for those who are bleeding, requires an invasive procedure, or who are otherwise at high risk for  
171 bleeding complications (26, 27).

172 Published studies indicate that COVID-19 is associated with a hyper-coagulable state. Venous  
173 thromboembolism (VTE) and arterial thrombosis ranging from 15% to 30% were found in  
174 critically ill patients with COVID-19 and about 7% in those admitted to medical wards (28-30).  
175 Abnormal thrombosis of different medical devices, deep vein thrombosis and multiple thrombi in  
176 the vessels of the lungs, kidneys and other organs at autopsy of patients who died of Covid-19  
177 have been reported serving as the impetus behind guidelines (9, 29) which support the use of  
178 therapeutic doses of heparin or low-molecular-weight heparin instead of prophylactic doses in  
179 critically ill COVID-19 patients (12, 26, 31). In the current study, thrombocytopenia was  
180 observed more frequently among males (23.8%) than females (19.8%) and older people (27.6%).  
181 Severe (42.68%) and critical (42%) patients also more frequently had thrombocytopenia and this  
182 was in line with studies conducted in different countries (20, 22, 32, 33). Thrombocytopenia,  
183 defined as platelet count less than  $100 \times 10^9$  cells/L were independently associated with COVID-  
184 19 severity (34). Studies suggest that routine coagulation test results are markers of disease  
185 severity and assist in management decision. In critically ill patients, thrombocytopenia correlates  
186 with multi-organ failure and death, and a decline in platelet count, even in the absence of overt  
187 thrombocytopenia, portends a worse outcome (9, 12, 13). In patients who are not bleeding, there  
188 is no evidence that correction of laboratory parameters with blood products improves outcomes.  
189 Replacement might worsen disseminated thrombosis and further deplete scarce blood products  
190 (28, 35).

191 Many studies reported that coagulopathy associated with COVID-19 is characterized by  
192 thrombocytopenia, prolongation of the prothrombin time, high levels of D-dimer, and elevated  
193 levels of fibrinogen, factor VIII, and von Willebrand factor (3, 11, 16). Published studies indicate  
194 that COVID-19-associated coagulopathy is characterized by a decreased platelet count (9, 36-

195 38)and a cytokine storm with an extreme hyper-coagulable state. Even though the reason for this  
196 life-threatening condition is not known, this might be due to an uncontrolled hyper-inflammatory  
197 response without previous immunity (39, 40).

198 **Conclusion:** In this study, prolonged prothrombin time and high INR were found among severe  
199 and critical COVID-19 patients. Thrombocytopenia and prolonged clotting time assay were  
200 dominant in COVID-19 patients older than 55 years. Thus, we recommend emphasis to be given  
201 for monitoring of platelet count, PT, APTT and INR in hospitalized COVID-19 patients  
202 management.

203 **Consent for publication:** Not applicable

204 **Availability of data and material**

205 All the available data were included in the manuscript.

206 **Funding:** None

207 **Conflict of interest:** The authors declare that they have no conflict of interest.

## 208 **References**

- 209 1. Sohrabi C, Alsafi Z, O'Neill N, Khan M, Kerwan A, Al-Jabir A, et al. World Health  
210 Organization declares global emergency: A review of the 2019 novel coronavirus (COVID-19).  
211 Int J Surg. 2020;76:71-6.
- 212 2. World Health Organization. Who coronavirus disease (covid-19) dashboard  
213 2020,November 8 [Available from: <https://covid19.who.int/info>.
- 214 3. Long H, Nie L, Xiang X, Li H, Zhang X, Fu X, et al. D-Dimer and Prothrombin Time  
215 Are the Significant Indicators of Severe COVID-19 and Poor Prognosis. BioMed research  
216 international. 2020;2020:6159720.
- 217 4. Guan WJ, Ni ZY, Hu Y, Liang WH, Ou CQ, He JX, et al. Clinical Characteristics of  
218 Coronavirus Disease 2019 in China. The New England journal of medicine. 2020;382(18):1708-  
219 20.
- 220 5. Aggarwal M, Dass J, Mahapatra M. Hemostatic Abnormalities in COVID-19: An  
221 Update. Indian J Hematol Blood Transfus. 2020:1-11.

- 222 6. Coccheri S. COVID-19: The crucial role of blood coagulation and fibrinolysis. *Intern*  
223 *Emerg Med.* 2020;15(8):1369-73.
- 224 7. Quintana-Díaz M, Andrés-Esteban EM, Ramírez-Cervantes KL, Oliven-Blázquez B,  
225 Juárez-Vela R, Gea-Caballero V. Coagulation Parameters: An Efficient Measure for Predicting  
226 the Prognosis and Clinical Management of Patients with COVID-19. *Journal of Clinical*  
227 *Medicine.* 2020;9(11).
- 228 8. Parasher A. COVID-19: Current understanding of its pathophysiology, clinical  
229 presentation and treatment. *Postgrad Med J.* 2020.
- 230 9. Al-Samkari H, Karp Leaf RS, Dzik WH, Carlson JCT, Fogerty AE, Waheed A, et al.  
231 COVID-19 and coagulation: bleeding and thrombotic manifestations of SARS-CoV-2 infection.  
232 *Blood.* 2020;136(4):489-500.
- 233 10. Annunziata A, Imitazione P, Polistina GE, Lanza M, Coppola A, Fiorentino G.  
234 Pulmonary Embolism in Covid-19: Coagulation Parameters, Close Monitoring to Prevent? *Turk*  
235 *Thorac J.* 2020;21(4):287-8.
- 236 11. Savioli F, Rocha LL. Coagulation profile in severe COVID-19 patients: what do we  
237 know so far? *Revista Brasileira de Terapia Intensiva.* 2020;32(2).
- 238 12. Buioni D, Nardi P, Ruvolo G. Thrombocytopenia and coagulation disorders due to  
239 COVID 19 infection with concomitant cardiovascular diseases requiring anti-platelet and  
240 anticoagulant therapy, which strategy? *Clin Chim Acta.* 2020;508:109.
- 241 13. Levi M. COVID-19 coagulopathy vs disseminated intravascular coagulation. *Blood Adv.*  
242 2020;4(12):2850.
- 243 14. Quintana-Diaz M, Andres-Esteban EM, Ramirez-Cervantes KL, Oliven-Blazquez B,  
244 Juarez-Vela R, Gea-Caballero V. Coagulation Parameters: An Efficient Measure for Predicting  
245 the Prognosis and Clinical Management of Patients with COVID-19. *J Clin Med.* 2020;9(11).
- 246 15. WHO. COVID19. 2020. Contract No.:
- 247 .
- 248 16. Chan NC, Weitz JI. COVID-19 coagulopathy, thrombosis, and bleeding. *Blood.*  
249 2020;41:100648.
- 250 17. Rauch A, Labreuche J, Lassalle F, Goutay J, Caplan M, Charbonnier L, et al. Coagulation  
251 biomarkers are independent predictors of increased oxygen requirements in COVID-19. *J*  
252 *Thromb Haemost.* 2020.
- 253 18. Zhang Y, He L, Chen H, Lu S, Xiong Y, Liu J, et al. Manifestations of blood coagulation  
254 and its relation to clinical outcomes in severe COVID-19 patients: Retrospective analysis. *Int J*  
255 *Lab Hematol.* 2020.
- 256 19. Zhang A, Leng Y, Zhang Y, Wu K, Ji Y, Lei S, et al. Meta-analysis of coagulation  
257 parameters associated with disease severity and poor prognosis of COVID-19. *International*  
258 *journal of infectious diseases : IJID : official publication of the International Society for*  
259 *Infectious Diseases.* 2020;100:441-8.
- 260 20. Luo HC, You CY, Lu SW, Fu YQ. Characteristics of coagulation alteration in patients  
261 with COVID-19. *Ann Hematol.* 2020.
- 262 21. Levi M, Thachil J, Iba T, Levy JH. Coagulation abnormalities and thrombosis in patients  
263 with COVID-19. *Lancet Haematol.* 2020;7(6):e438-e40.
- 264 22. Zou Y, Guo H, Zhang Y, Zhang Z, Liu Y, Wang J, et al. Analysis of coagulation  
265 parameters in patients with COVID-19 in Shanghai, China. *Biosci Trends.* 2020;14(4):285-9.

- 266 23. Sayad B, Rahimi Z. Blood coagulation parameters in patients with severe COVID-19  
267 from Kermanshah Province, Islamic Republic of Iran. *East Mediterr Health J.* 2020;26(9):999-  
268 1004.
- 269 24. Adam EH, Zacharowski K, Miesbach W. A comprehensive assessment of the coagulation  
270 profile in critically ill COVID-19 patients. *Thromb Res.* 2020;194:42-4.
- 271 25. Paar V, Wernly B, Zhou Z, Motloch LJ, Hoppe UC, Egle A, et al. Anti-coagulation for  
272 COVID-19 treatment: both anti-thrombotic and anti-inflammatory? *J Thromb Thrombolysis.*  
273 2020.
- 274 26. Belen-Apak FB, Sarialioglu F. Pulmonary intravascular coagulation in COVID-19:  
275 possible pathogenesis and recommendations on anticoagulant/thrombolytic therapy. *J Thromb*  
276 *Thrombolysis.* 2020;50(2):278-80.
- 277 27. Lee AY, Connors JM, Kreuziger LB, Murphy M, Gernsheimer T, Lin Y, et al. COVID-  
278 19 and Coagulopathy 2020, December 1 [Available from: <https://www.hematology.org/COVID-19/COVID-19-and-coagulopathy>.  
279 <https://www.hematology.org/COVID-19/COVID-19-and-coagulopathy>].
- 280 28. Harenberg J, Favaloro E. COVID-19: progression of disease and intravascular  
281 coagulation - present status and future perspectives. *Clin Chem Lab Med.* 2020;58(7):1029-36.
- 282 29. Pizzi R, Gini G, Caiano L, Castelli B, Dotan N, Magni F, et al. Coagulation parameters  
283 and venous thromboembolism in patients with and without COVID-19 admitted to the  
284 Emergency Department for acute respiratory insufficiency. *Thromb Res.* 2020;196:209-12.
- 285 30. Voicu S, Delrue M, Chousterman BG, Stepanian A, Bonnin P, Malissin I, et al.  
286 Imbalance between procoagulant factors and natural coagulation inhibitors contributes to  
287 hypercoagulability in the critically ill COVID-19 patient: clinical implications. *Eur Rev Med*  
288 *Pharmacol Sci.* 2020;24(17):9161-8.
- 289 31. Mei H, Hu Y. [Characteristics, causes, diagnosis and treatment of coagulation  
290 dysfunction in patients with COVID-19]. *Zhonghua Xue Ye Xue Za Zhi.* 2020;41(3):185-91.
- 291 32. Bao C, Tao X, Cui W, Yi B, Pan T, Young KH, et al. SARS-CoV-2 induced  
292 thrombocytopenia as an important biomarker significantly correlated with abnormal coagulation  
293 function, increased intravascular blood clot risk and mortality in COVID-19 patients. *Exp*  
294 *Hematol Oncol.* 2020;9:16.
- 295 33. Xiong M, Liang X, Wei YD. Changes in blood coagulation in patients with severe  
296 coronavirus disease 2019 (COVID-19): a meta-analysis. *Br J Haematol.* 2020;189(6):1050-2.
- 297 34. Kander T. Coagulation disorder in COVID-19. *The Lancet Haematology.*  
298 2020;7(9):e630-e2.
- 299 35. Song JC, Wang G, Zhang W, Zhang Y, Li WQ, Zhou Z, et al. Chinese expert consensus  
300 on diagnosis and treatment of coagulation dysfunction in COVID-19. *Mil Med Res.*  
301 2020;7(1):19.
- 302 36. Chen X, Wang Q, Xu M, Li C. A Retrospective Analysis of the Coagulation Dysfunction  
303 in COVID-19 Patients. *Clin Appl Thromb Hemost.* 2020;26:1076029620964868.
- 304 37. Pavoni V, Giancesello L, Pazzi M, Stera C, Meconi T, Frigieri FC. Evaluation of  
305 coagulation function by rotation thromboelastometry in critically ill patients with severe  
306 COVID-19 pneumonia. *J Thromb Thrombolysis.* 2020;50(2):281-6.
- 307 38. Savioli F, Rocha LL. Coagulation profile in severe COVID-19 patients: what do we  
308 know so far? *Rev Bras Ter Intensiva.* 2020;32(2):197-9.
- 309 39. Jose RJ, Manuel A. COVID-19 cytokine storm: the interplay between inflammation and  
310 coagulation. *Lancet Respir Med.* 2020;8(6):e46-e7.

311 40. Kasinathan G, Sathar J. Haematological manifestations, mechanisms of thrombosis and  
312 anti-coagulation in COVID-19 disease: A review. *Ann Med Surg (Lond)*. 2020;56:173-7.

313

314

315

1 ***Blood coagulation parameter abnormalities in hospitalized patients with confirmed COVID-19***  
2 ***in Ethiopia***

3 Shambel Araya<sup>1&2\*</sup>, Mintesnot\_Aragaw Mamo<sup>1&2</sup>, Yakob\_Gebregziabher Tsegay<sup>3&4</sup>, Asegdew Atlaw<sup>2</sup>,  
4 Aschalew Ayteneu<sup>2</sup>, Abebe Hordofa<sup>2</sup>, Abebe Edao Negeso<sup>1</sup>, MogesWordofa<sup>1</sup>, Tirhas Niguse<sup>1</sup>, Mahlet  
5 Cheru<sup>1</sup>,Zemenu Tamir<sup>1</sup>

6 <sup>1</sup>Department of Medical Laboratory Sciences, College of Health Sciences, Addis Ababa  
7 University, Addis Ababa, Ethiopia

8 <sup>2</sup>Department of Medical Laboratory, Millennium COVID-19 Treatment and Care Centre,  
9 St. Paul Millennium Medical College, Addis Ababa, Ethiopia;

10 <sup>3</sup>Department of Medical Biotechnology, Institute of Biotechnology, University of  
11 Gondar, Gondar, Ethiopia.

12 <sup>4</sup>Department of Research and development center, College of Health Sciences, Defense  
13 University, Addis Ababa, Ethiopia.

14 Address:

15 1. Shambel Araya (corresponding author);[shambelaraya8@gmail.com](mailto:shambelaraya8@gmail.com)

16 2. Mintsnot\_Aragaw Mamo;[mintsh2015@gmail.com](mailto:mintsh2015@gmail.com)

17 3. Yakob\_Gebreegziabher\_Tsegaye: [yakobtsegay17@gmail.com](mailto:yakobtsegay17@gmail.com)

18 4. Asegdew\_Atlaw: [asegdew21@gmail.com](mailto:asegdew21@gmail.com)

19 5. AschalewAyteneu:[aschu9033@gmail.com](mailto:aschu9033@gmail.com)

20 6. Abebe Hordofa: [abuhordofa@gmail.com](mailto:abuhordofa@gmail.com)

21 7. Abebe EdaoNegeso:[abenegesso@gmail.com](mailto:abenegesso@gmail.com)

22 8. Moges\_Wordofa: [heranmakmow@gmail.com](mailto:heranmakmow@gmail.com)

23 9. TirhasNiguse;[peace.for.all.060610@gmail.com](mailto:peace.for.all.060610@gmail.com)

24 10. MahletCheru:[yuluyaya54@gmail.com](mailto:yuluyaya54@gmail.com)

25 11. Zemenu Tamir: [zemenut266@gmail.com](mailto:zemenut266@gmail.com)

26 **Abstract**

27 **Background:** Coagulopathy and thromboembolic events are among the complications of Corona  
28 Virus disease 2019 (COVID-19). ~~Thus, a~~Abnormal coagulation ~~profiles-parameters~~ in COVID-  
29 19 patients are ~~taken-as~~ important prognostic factors of ~~COVID-19~~ disease severity. The aim of  
30 this study was to analyze coagulation profiles of hospitalized COVID-19 patients in Addis  
31 Ababa, Ethiopia. **Methods:** This prospective cross-sectional study was conducted among 455  
32 Covid-19 patients admitted at Millennium COVID-19 care and treatment center, Addis Ababa,  
33 Ethiopia from July 1- October 23, 2020. Prothrombin Time (PT), Activated Partial  
34 Thromboplastin Time (APTT) and International normalized ratio (INR) were determined on  
35 HUMACLOT DUE PLUS® coagulation analyzer (Wiesbaden, Germany). In all statistical  
36 analysis of results -tests,  $p < 0.05$  was defined as statistically significant.

37 **Result:** A prolonged prothrombin time was found in 46.8% of study ~~subjects- participants~~  
38 ~~withparticipants with~~ COVID-19 and a prolonged prothrombin time and elevated INR inwith  
39 53.3% of study subjects with severe and 51 % of critically COVID patients. Thrombocytopenia  
40 was detected in 22.1% of COVID-19 patients. 50.5% and 51.3% of COVID-19 patients older  
41 than 55 years had thrombocytopenia and prolonged APTT respectively.

42 **Conclusion:**

43 In this study, prolonged prothrombin time and high-elevated INR were detected in more  
44 thanaround 50% of severe and critical COVID-19 patients. Thrombocytopenia and prolonged  
45 APTT were dominant in COVID-19 patients older than 55 years. Thus, we recommend emphasis  
46 to be given for monitoring of platelet count, PT, APTT and INR in hospitalized and admitted  
47 COVID-19 patients.



48 **Key words:** activated partial thromboplastin time, ~~COVID~~, COVID-19, Prothrombin time,  
49 ~~activated partial thromboplastin time~~, international normalized ratio, Platelet, Addis Ababa,  
50 Ethiopia.

51

## 52 **Introduction**

53 Coronavirus disease 2019 (COVID-19) is caused by a novel beta corona virus called severe acute  
54 respiratory syndrome coronavirus 2 (SARS-CoV-2)(1). COVID-19 has become a pandemic that  
55 has [heavily](#) affected the global population. As of November 8, 2020, there have been [more than](#)  
56 [49 million](#) ~~49,578,590~~ confirmed cases of COVID-19 and [more than 1.2 million](#) ~~1,245,717~~  
57 deaths, reported to World Health organization (WHO). Similarly, there have been 99,204  
58 confirmed cases of COVID-19 with 1,518 deaths in Ethiopia(2).

59 The severity of COVID-19 [infection ranges varies](#) considerably from asymptomatic to life  
60 threatening, [with](#) lung injury being the main clinical manifestation. Most of the patients have a  
61 favorable prognosis, but some rapidly progress to severe ~~and critical cases with~~ respiratory  
62 distress syndrome, coagulation dysfunction and multiple organ failures (3, 4). Although the  
63 pathophysiology and the underlining mechanisms of clinical manifestations remain unclear,  
64 thrombo-inflammation and cytokine storm are clearly established components in Severe Acute  
65 Respiratory Distress Syndrome (SARS) of COVID-19(5-8).

66 Coagulopathy and abnormal coagulation ~~profiles-parameters~~ were indicated among the most  
67 significant [biomarkers](#) of poor prognosis in COVID-19 patients (9-11). A retrospective cohort  
68 study conducted in Spain Madrid demonstrated that COVID-19 non-survivors had significantly  
69 lower prothrombin ~~activitytime~~, abnormal coagulation parameters ~~like-such as~~ prolonged PT,  
70 APTT, higher D- dimer and higher fibrinogen levels compared to survivors indicating  
71 coagulation parameters could be an efficient measure for predicting the prognosis of patients  
72 with SARS COV-2(7) and [used as guiding clinical](#) management. Similarly, Long et al has  
73 reported that occurrence of coagulation dysfunction is more likely in severe and critically ill  
74 patients. The study also showed that D-dimer and prothrombin time could be considered as main

75 indicators in predicting the mortality of COVID-19 patients (3). ~~Several~~ Many studies have  
76 also demonstrated the increased occurrence of intravascular disseminated coagulopathy (DIC) in  
77 patients with COVID-19 (12, 13). The result of blood coagulation ~~parameters~~ profiles in  
78 COVID-19 patients can also guide management decisions and improve outcomes (12, 14).  
79 Moreover, routine coagulation parameter tests results could potentially be utilized in  
80 symptomatic patients in resource limited settings with inadequate access to COVID-19 RT-PCR,  
81 as in Ethiopia, to raise suspension of this infection. However, data on coagulation profiles among  
82 Ethiopian COVID-19 patients is not readily available. Thus, the aim of this study was to  
83 determinethe coagulation profile of COVID-19 patients admitted at Millennium COVID-19  
84 treatment center, Addis Ababa, Ethiopia.

## 85 ***Methods***

86 ***Ethical consideration:*** Ethical clearance was obtained and approved by Addis Ababa University  
87 College of Health Sciences, department of Medical Laboratory Sciences research ethics review  
88 committee (DRERC/538/20/MLS) and it was in accordance with the principles of the Helsinki II  
89 declaration. Laboratory test results were communicated to the responsible clinicians working at  
90 COVID-19 care and the treatment center. Written informed consent was obtained from the study  
91 participants. All the personal identifying information obtained from the study participants were  
92 kept confidential.

## 93 ***Study population***

94 In this study, we have included 455 consecutive patients with confirmed SARS-CoV-2 infection  
95 admitted to Millennium COVID-19 treatment center, Addis Ababa, Ethiopia from July 1-  
96 October 23, 2020. The treatment center is the first referral center for COVID-19 patients in

97 Ethiopia, since May 02, 2020. None of the study participants were ~~receiving~~receiving  
98 anticoagulant medications before blood drawing. Diagnosis of SARS-CoV-2 infection was made  
99 with real time RT-PCR.

## 100 *Sample collection and coagulation profile analysis*

### 101 *2.6. Laboratory Analysis*

102 Venous bloods were collected by professional nurses working in the COVID-19 care and  
103 treatment center: 5 mL in EDTA and 3 mL in 3.2% sodium citrated anti-coagulated tube for  
104 analysis of coagulation parameters. The samples for coagulation profile tests were collected at  
105 hospital admission. The prothrombin time (PT), activated partial prothrombin time (APTT), and  
106 international normalized ratio (INR) were analyzed using HUMACLOT DUE PLUS®  
107 coagulation analyzer (Wiesbaden®, Germany). Platelet count was performed using UniCel®  
108 DxH 800 Coulter®Cellular Analysis System (Beckman Coulter®, Inc. 4300 N. Harbor Blvd.  
109 Fullerton, CA 92835). The coagulation parameters were compared with the manufacturer cut off  
110 normal range of PT = 11.7- 15 seconds, APTT = 23.8- 37.9 seconds, INR = 1.0- 1.2 and PLT=  
111 159-386/ $\mu$ .l. The coagulation parameters above the cut off ~~range-value~~ were considered as a  
112 prolonged ~~time~~ and thrombocytopenia in the case of lower than cut off value for platelets. All  
113 laboratory tests and ~~its~~ interpretation were done following the manufacturers' recommendation  
114 and standard operating procedures set out by the center.

### 115 *Statistical Analysis*

116 Statistical Package for the Social Sciences (SPSS) software version 25.0 (SPSS® Inc., Chicago,  
117 IL, USA) was used for statistical analysis. Chi-square test was used to determine association

118 among categorical variables. The quantitative data were expressed as Mean  $\pm$  SD. P value < 0.05  
119 was considered as statistically significant.

120

## 121 *Results*

### 122 *Socio-demographic and Clinical characteristics of Study participants*

123 In this study, 455 patients diagnosed with COVID-19 were included. Among the study  
124 participants, 289 (63.5%) were males. The study participants were between the age of 4 and 90  
125 years with a mean of 49.9  $\pm$ 18.3 years. From the total 455 ~~cases~~study subjects, there  
126 were 297 mild cases, 90 severe cases, and 68 critical cases based on disease severity of COVID-  
127 19(Table 1).

128 **Table 1:** Socio-demographic characteristics of study participants

| Variables        |             | Frequency | Percent |
|------------------|-------------|-----------|---------|
| Gender           | Male        | 289       | 63.5%   |
|                  | Female      | 166       | 36.5%   |
| Age group        | 0-18 years  | 15        | 3.2%    |
|                  | 18-35 years | 101       | 22.1%   |
|                  | 36-55 years | 158       | 34.7%   |
|                  | >55 years   | 181       | 39.7%   |
| Disease severity | Moderate    | 297       | 65.2%   |

|  |          |    |       |
|--|----------|----|-------|
|  | Severe   | 90 | 19.8% |
|  | Critical | 68 | 15%   |

129 The median time from the disease onset to admission was 4 days (2-8 days). Severe and critical  
130 groups showed differences in sex ratio and age distribution. In severe (36.6%) and critical groups  
131 (48.5%), were elderly males of the age of >55 years old.  $y$  (Table 2).

132

133 **Table 2: Socio-demographic characteristics and disease severity of COVID-19 patients**

| Variables       |               | Disease Severity |               |                 | P-value |
|-----------------|---------------|------------------|---------------|-----------------|---------|
|                 |               | Moderate, n (%)  | Severe, n (%) | Critical, n (%) |         |
| Age(year)       | 0-18, n= 15   | 10(66.7)         | 4(26.7)       | 1(6.7)          | 0.283   |
|                 | 18-35, n=101  | 65(64.35)        | 22(21.78)     | 14(13.8)        |         |
|                 | 36-55, n=158  | 107(67.7)        | 31(19.6)      | 20(12.65)       |         |
|                 | >55, n=181    | 115(63.5)        | 33(18.2)      | 33(8.2)         |         |
| Sex,<br>$N=455$ | Male, n=289   | 187(64.7)        | 56(19.3)      | 46(15.9)        | 0.045   |
|                 | Female, n=166 | 110(66.2)        | 34(20.4)      | 22(13.2)        |         |

134 ***Magnitude of coagulation abnormalities***

135 In this study, 209 COVID-19 patients (46%) showed prolonged PT and ~~elevated~~higher INR  
136 values. Among those ~~patients~~ study participants with prolonged PT, 51.3% were above 55 years  
137 of age. Prolonged PT values were demonstrated more frequently among males (49.8%) than  
138 females (41%) and this difference was statistically ~~different~~ significant (P = 0.045). Similarly,  
139 51.4% and 53.3% of ICU (critical) and severe patients had prolonged PT values. Notably,  
140 prolonged APTT values were found among 43.1% of individuals, and from these 47%, 45% and

141 41% were among ICU (critical), severe and moderate patients, respectively. 57.2% of female  
 142 patients had prolonged APTT; and 51.3% of patients aged older than 55 years had a prolonged  
 143 APTT.

144 Thrombocytopenia was detected in 22.1% (101 out of 455) study subjects. 50.5% (50 out of 99)  
 145 patients aged older than 55 years had thrombocytopenia and the occurrence was higher among  
 146 male (23.8%) than female (18%) ICU patients (Table 3).

147

| <i>Coagulation Parameters</i> |                 | <i>Variables</i>     |                       |                       |                        |                      |                        |                          |                        |                          |
|-------------------------------|-----------------|----------------------|-----------------------|-----------------------|------------------------|----------------------|------------------------|--------------------------|------------------------|--------------------------|
|                               |                 | <i>Age</i>           |                       |                       |                        | <i>Sex</i>           |                        | <i>Disease Severity</i>  |                        |                          |
|                               |                 | <i>0-18<br/>n(%)</i> | <i>19-35<br/>n(%)</i> | <i>36-55<br/>n(%)</i> | <i>&gt;55<br/>n(%)</i> | <i>Male<br/>n(%)</i> | <i>Female<br/>n(%)</i> | <i>Moderate<br/>n(%)</i> | <i>Severe<br/>n(%)</i> | <i>Critical<br/>n(%)</i> |
| PT                            | High<br>n=213   | 9(4.2)               | 50(23.47)             | 61(28.6)              | 93(43.6)               | 144(67.6)            | 69(32.4)               | 130(61)                  | 48(22.5)               | 35(16.4)                 |
|                               | Normal<br>n=220 | 6(2.7)               | 45(20.45)             | 89(40.4)              | 80(36.3)               | 131(59.5)            | 89(40.4)               | 149(67.7)                | 40(18.1)               | 31(14.1)                 |
|                               | Low=22          | 0                    | 6(27.2)               | 8(36.3)               | 8(36.3)                | 14(63.6)             | 8(36.3)                | 18(81)                   | 2(9)                   | 2(9)                     |
| APTT                          | High=196        | 6(3)                 | 46(23.4)              | 68(34.7)              | 76(38.77)              | 101(51.5)            | 95(48.5)               | 115(58.67)               | 41(21)                 | 42(21.4)                 |
|                               | Normal<br>n=193 | 6(3.1)               | 38(19.7)              | 70(36.2)              | 79(41)                 | 136(70.4)            | 57(29.5)               | 137(71)                  | 36(18.6)               | 21(10.8)                 |
|                               | Low<br>n=66     | 3(4.5)               | 17(25.7)              | 20(30.3)              | 26(39.3)               | 52(78.7)             | 14(21)                 | 45(68)                   | 13(19.7)               | 5(7.5)                   |
| PLT                           | High<br>n=65    | 4(6.1)               | 11(17)                | 24(37)                | 26(40)                 | 43(66)               | 22(33.8)               | 39(60)                   | 8(12.3)                | 8(12.3)                  |

|     |                 |        |          |           |           |           |          |           |          |          |
|-----|-----------------|--------|----------|-----------|-----------|-----------|----------|-----------|----------|----------|
|     | Normal<br>n=289 | 8(3)   | 70(24.2) | 105(36.3) | 105(36.3) | 175(60.8) | 114(39)  | 214(74)   | 44(15)   | 31(10.6) |
|     | Low<br>n=101    | 3(2.9) | 20(20)   | 28(27.7)  | 50(49.5)  | 69(69.70) | 30(30.3) | 33(32)    | 38(37.6) | 30(29.7) |
| INR | High<br>n=210   | 9(4.2) | 50(24.7) | 60(28.5)  | 91(43.3)  | 141(67)   | 69(32.8) | 127(60.4) | 50(23.8) | 33(15.7) |
|     | Normal<br>n=224 | 5(2.2) | 44(19.6) | 93(41.5)  | 82(36.6)  | 115(51)   | 75(33.4) | 113(50.4) | 45(20)   | 32(14.2) |
|     | Low<br>n=21     | 1(4.7) | 7(33.3)  | 5(23.8)   | 8(38)     | 14(66.6)  | 7(33.3)  | 15(71)    | 3(14.5)  | 3(14.5)  |

148 **Table 3: Result of coagulation parameters in patients with severe COVID-19 according to**

149 **different variables**

150 PLT=platelet; PT= prothrombin time; APTT=activated partial thromboplastin time;

151 INR=international normalized ratio.

## 152 Discussion

153 The COVID-19 pandemic had a major impact on health care globally. COVID-19 has already

154 caused >1.2 million deaths worldwide and more than 1400 in Ethiopia as of October 30,2020

155 according to WHO report(15). Coagulation abnormalities are frequent in COVID-19 patients

156 and are associated with poor prognosis and reduced survival(7). The dysregulation of

157 coagulation ~~and~~ associated with hypercoagulability ~~in patients with COVID~~ manifests as venous

158 and arterial thrombosis and multiorgan dysfunction(16); which are poor prognostic markers

159 ~~resulting in increased mortality and hospitalization and ICU admission~~ (13, 14, 17-19). Previous

160 studies indicated that the coagulopathy in patients hospitalized with COVID-19 is characterized

161 by increases in coagulation parameters such as PT, APTT and INR (20, 21).



162 Patients with serious infection are more likely to have COVID-19 associated coagulopathy than  
163 patients with a mild infection (21,22). ~~In our~~In this recent study, prolonged PT, APTT and INR  
164 were~~was~~ more frequent among severe and critical COVID-19 patients. Similarly, studies also  
165 reported that thrombotic complications are common among COVID-19 patients admitted to  
166 intensive care unit (ICU) (~~9.5%–47%~~)(22-24).

167 Treatment of the underlying condition is suggested to be paramount in coagulopathies. It is  
168 shown that bleeding is not common clinical manifestation in COVID-19 infections despite  
169 abnormal coagulation parameters (23,24)- and supportive care including blood product  
170 transfusion should be individualized in COVID -19 patients(25, 26). Laboratory findings alone  
171 should not be taken as basis for instituting blood transfusion therapy, rather it should be reserved  
172 for those who are bleeding, requires an invasive procedure, or who are otherwise at high risk for  
173 bleeding complications (26, 27).

174 Published studies indicate that COVID-19 is associated with a hyper-coagulable state. Venous  
175 thromboembolism (VTE) and arterial thrombosis ranging from 15% to 30% were found in  
176 critically ill patients with COVID-19 and about 7% in those admitted to medical wards (28-30).  
177 Abnormal thrombosis of different medical devices, deep vein thrombosis and multiple thrombi in  
178 the vessels of the lungs, kidneys and other organs at autopsy of patients who died of Covid-19  
179 have been reported serving as the impetus behind guidelines (9, 29)which support the use of  
180 therapeutic doses of heparin or low-molecular-weight heparin instead of prophylactic doses in  
181 critically ill COVID-19 patients (12, 26, 31).In the current study, thrombocytopenia was  
182 observed more frequently among males (23.8%) than females (19.8%) and older people (27.6%).  
183 Severe (42.68%) and critical (42%) patients also more frequently had thrombocytopenia and this  
184 was in line with studies conducted in different countries (20, 22, 32, 33). Thrombocytopenia,

185 defined as platelet count less than  $100 \times 10^9$  cells/L were independently associated with COVID-  
186 19 severity(34). Studies suggest that routine coagulation test results are markers of disease  
187 severity and assist in management decision. In critically ill patients, thrombocytopenia correlates  
188 with multi-organ failure and death, and a decline in platelet count, even in the absence of overt  
189 thrombocytopenia, portends a worse outcome (9, 12, 13). In patients who are not bleeding, there  
190 is no evidence that correction of laboratory parameters with blood products improves outcomes.  
191 Replacement might worsen disseminated thrombosis and further deplete scarce blood products  
192 (28, 35).

193 Many studies reported that coagulopathy associated with COVID-19 is characterized by  
194 thrombocytopenia, prolongation of the prothrombin time, high levels of D-dimer, and elevated  
195 levels of fibrinogen, factor VIII, and von Willebrand factor (3, 11, 16). ~~The degree of~~  
196 ~~coagulation abnormalities in critically ill non-COVID patients correlates with disease severity~~  
197 ~~and predict the risk of thrombosis, the need for ventilator support, and mortality.~~ Published  
198 studies ~~indicatesupport~~ that COVID-19-associated coagulopathy is characterized by a decreased  
199 platelet count (9, 36-38). ~~Patients with critical COVID-19 infection~~ and a cytokine storm  
200 ~~with~~have an extreme hyper-coagulable state. Even though the reason for this life-threatening  
201 condition is not known, this might be due to an uncontrolled hyper-inflammatory response  
202 without previous immunity (39, 40).

203 **Conclusion:** In this study, prolonged prothrombin time and high INR were found among severe  
204 and critical COVID-19 patients. Thrombocytopenia and prolonged clotting time assay-APTT  
205 were dominant in COVID-19 patients older than 55 years. Thus, we recommend emphasis to be

206 given for monitoring of platelet count, PT, APTT and INR in hospitalized COVID-19 patients  
207 management.

208 **Consent for publication:** Not applicable

209 **Availability of data and material**

210 All the available data were included in the manuscript.

211 **Funding:** None

212 **Conflict of interest:** The authors declare that they have no conflict of interest.

213 References

- 214 1. Sohrabi C, Alsafi Z, O'Neill N, Khan M, Kerwan A, Al-Jabir A, et al. World Health  
215 Organization declares global emergency: A review of the 2019 novel coronavirus (COVID-19).  
216 Int J Surg. 2020;76:71-6.
- 217 2. World Health Organization. Who coronavirus disease (covid-19) dashboard  
218 2020, November 8 [Available from: <https://covid19.who.int/info>].
- 219 3. Long H, Nie L, Xiang X, Li H, Zhang X, Fu X, et al. D-Dimer and Prothrombin Time  
220 Are the Significant Indicators of Severe COVID-19 and Poor Prognosis. BioMed research  
221 international. 2020;2020:6159720.
- 222 4. Guan WJ, Ni ZY, Hu Y, Liang WH, Ou CQ, He JX, et al. Clinical Characteristics of  
223 Coronavirus Disease 2019 in China. The New England journal of medicine. 2020;382(18):1708-  
224 20.
- 225 5. Aggarwal M, Dass J, Mahapatra M. Hemostatic Abnormalities in COVID-19: An  
226 Update. Indian J Hematol Blood Transfus. 2020:1-11.
- 227 6. Coccheri S. COVID-19: The crucial role of blood coagulation and fibrinolysis. Intern  
228 Emerg Med. 2020;15(8):1369-73.
- 229 7. Quintana-Díaz M, Andrés-Esteban EM, Ramírez-Cervantes KL, Oliván-Blázquez B,  
230 Juárez-Vela R, Gea-Caballero V. Coagulation Parameters: An Efficient Measure for Predicting  
231 the Prognosis and Clinical Management of Patients with COVID-19. Journal of Clinical  
232 Medicine. 2020;9(11).
- 233 8. Parasher A. COVID-19: Current understanding of its pathophysiology, clinical  
234 presentation and treatment. Postgrad Med J. 2020.
- 235 9. Al-Samkari H, Karp Leaf RS, Dzik WH, Carlson JCT, Fogerty AE, Waheed A, et al.  
236 COVID-19 and coagulation: bleeding and thrombotic manifestations of SARS-CoV-2 infection.  
237 Blood. 2020;136(4):489-500.
- 238 10. Annunziata A, Imitazione P, Polistina GE, Lanza M, Coppola A, Fiorentino G.  
239 Pulmonary Embolism in Covid-19: Coagulation Parameters, Close Monitoring to Prevent? Turk  
240 Thorac J. 2020;21(4):287-8.

- 241 11. Savioli F, Rocha LL. Coagulation profile in severe COVID-19 patients: what do we  
242 know so far? *Revista Brasileira de Terapia Intensiva*. 2020;32(2).
- 243 12. Buioni D, Nardi P, Ruvolo G. Thrombocytopenia and coagulation disorders due to  
244 COVID 19 infection with concomitant cardiovascular diseases requiring anti-platelet and  
245 anticoagulant therapy, which strategy? *Clin Chim Acta*. 2020;508:109.
- 246 13. Levi M. COVID-19 coagulopathy vs disseminated intravascular coagulation. *Blood Adv*.  
247 2020;4(12):2850.
- 248 14. Quintana-Diaz M, Andres-Esteban EM, Ramirez-Cervantes KL, Olivan-Blazquez B,  
249 Juarez-Vela R, Gea-Caballero V. Coagulation Parameters: An Efficient Measure for Predicting  
250 the Prognosis and Clinical Management of Patients with COVID-19. *J Clin Med*. 2020;9(11).
- 251 15. WHO. COVID19. 2020. Contract No.:
- 252 .
- 253 16. Chan NC, Weitz JI. COVID-19 coagulopathy, thrombosis, and bleeding. *Blood*.  
254 2020;41:100648.
- 255 17. Rauch A, Labreuche J, Lassalle F, Goutay J, Caplan M, Charbonnier L, et al. Coagulation  
256 biomarkers are independent predictors of increased oxygen requirements in COVID-19. *J*  
257 *Thromb Haemost*. 2020.
- 258 18. Zhang Y, He L, Chen H, Lu S, Xiong Y, Liu J, et al. Manifestations of blood coagulation  
259 and its relation to clinical outcomes in severe COVID-19 patients: Retrospective analysis. *Int J*  
260 *Lab Hematol*. 2020.
- 261 19. Zhang A, Leng Y, Zhang Y, Wu K, Ji Y, Lei S, et al. Meta-analysis of coagulation  
262 parameters associated with disease severity and poor prognosis of COVID-19. *International*  
263 *journal of infectious diseases : IJID : official publication of the International Society for*  
264 *Infectious Diseases*. 2020;100:441-8.
- 265 20. Luo HC, You CY, Lu SW, Fu YQ. Characteristics of coagulation alteration in patients  
266 with COVID-19. *Ann Hematol*. 2020.
- 267 21. Levi M, Thachil J, Iba T, Levy JH. Coagulation abnormalities and thrombosis in patients  
268 with COVID-19. *Lancet Haematol*. 2020;7(6):e438-e40.
- 269 22. Zou Y, Guo H, Zhang Y, Zhang Z, Liu Y, Wang J, et al. Analysis of coagulation  
270 parameters in patients with COVID-19 in Shanghai, China. *Biosci Trends*. 2020;14(4):285-9.
- 271 23. Sayad B, Rahimi Z. Blood coagulation parameters in patients with severe COVID-19  
272 from Kermanshah Province, Islamic Republic of Iran. *East Mediterr Health J*. 2020;26(9):999-  
273 1004.
- 274 24. Adam EH, Zacharowski K, Miesbach W. A comprehensive assessment of the coagulation  
275 profile in critically ill COVID-19 patients. *Thromb Res*. 2020;194:42-4.
- 276 25. Paar V, Wernly B, Zhou Z, Motloch LJ, Hoppe UC, Egle A, et al. Anti-coagulation for  
277 COVID-19 treatment: both anti-thrombotic and anti-inflammatory? *J Thromb Thrombolysis*.  
278 2020.
- 279 26. Belen-Apak FB, Sarialioglu F. Pulmonary intravascular coagulation in COVID-19:  
280 possible pathogenesis and recommendations on anticoagulant/thrombolytic therapy. *J Thromb*  
281 *Thrombolysis*. 2020;50(2):278-80.
- 282 27. Lee AY, Connors JM, Kreuziger LB, Murphy M, Gernsheimer T, Lin Y, et al. COVID-  
283 19 and Coagulopathy 2020, December 1 [Available from: <https://www.hematology.org/COVID-19/COVID-19-and-coagulopathy>].
- 284 28. Harenberg J, Favaloro E. COVID-19: progression of disease and intravascular  
285 coagulation - present status and future perspectives. *Clin Chem Lab Med*. 2020;58(7):1029-36.
- 286

- 287 29. Pizzi R, Gini G, Caiano L, Castelli B, Dotan N, Magni F, et al. Coagulation parameters  
288 and venous thromboembolism in patients with and without COVID-19 admitted to the  
289 Emergency Department for acute respiratory insufficiency. *Thromb Res.* 2020;196:209-12.
- 290 30. Voicu S, Delrue M, Chousterman BG, Stepanian A, Bonnin P, Malissin I, et al.  
291 Imbalance between procoagulant factors and natural coagulation inhibitors contributes to  
292 hypercoagulability in the critically ill COVID-19 patient: clinical implications. *Eur Rev Med*  
293 *Pharmacol Sci.* 2020;24(17):9161-8.
- 294 31. Mei H, Hu Y. [Characteristics, causes, diagnosis and treatment of coagulation  
295 dysfunction in patients with COVID-19]. *Zhonghua Xue Ye Xue Za Zhi.* 2020;41(3):185-91.
- 296 32. Bao C, Tao X, Cui W, Yi B, Pan T, Young KH, et al. SARS-CoV-2 induced  
297 thrombocytopenia as an important biomarker significantly correlated with abnormal coagulation  
298 function, increased intravascular blood clot risk and mortality in COVID-19 patients. *Exp*  
299 *Hematol Oncol.* 2020;9:16.
- 300 33. Xiong M, Liang X, Wei YD. Changes in blood coagulation in patients with severe  
301 coronavirus disease 2019 (COVID-19): a meta-analysis. *Br J Haematol.* 2020;189(6):1050-2.
- 302 34. Kander T. Coagulation disorder in COVID-19. *The Lancet Haematology.*  
303 2020;7(9):e630-e2.
- 304 35. Song JC, Wang G, Zhang W, Zhang Y, Li WQ, Zhou Z, et al. Chinese expert consensus  
305 on diagnosis and treatment of coagulation dysfunction in COVID-19. *Mil Med Res.*  
306 2020;7(1):19.
- 307 36. Chen X, Wang Q, Xu M, Li C. A Retrospective Analysis of the Coagulation Dysfunction  
308 in COVID-19 Patients. *Clin Appl Thromb Hemost.* 2020;26:1076029620964868.
- 309 37. Pavoni V, Ganesello L, Pazzi M, Stera C, Meconi T, Frigieri FC. Evaluation of  
310 coagulation function by rotation thromboelastometry in critically ill patients with severe  
311 COVID-19 pneumonia. *J Thromb Thrombolysis.* 2020;50(2):281-6.
- 312 38. Savioli F, Rocha LL. Coagulation profile in severe COVID-19 patients: what do we  
313 know so far? *Rev Bras Ter Intensiva.* 2020;32(2):197-9.
- 314 39. Jose RJ, Manuel A. COVID-19 cytokine storm: the interplay between inflammation and  
315 coagulation. *Lancet Respir Med.* 2020;8(6):e46-e7.
- 316 40. Kasinathan G, Sathar J. Haematological manifestations, mechanisms of thrombosis and  
317 anti-coagulation in COVID-19 disease: A review. *Ann Med Surg (Lond).* 2020;56:173-7.

318

319
